# Supplementary material for: Analysis of a Marseillevirus Transcriptome Reveals Temporal Gene Expression Profile and Host Transcriptional Shift
Source: Front Microbiol. 2020 Apr 14;11:651. doi: 10.3389/fmicb.2020.00651 (PMC7192143; doi:10.3389/fmicb.2020.00651)
Supplement: TABLE S2 — Expression data in TPM for all genes at each evaluated time of infection (0 h corresponds to 30 min of infection due to virus adsorption period). [file Table_2.xls]

## Sheet: Plan1
Gene	Gene function	Time of infection (expression data in TPM)
		0h	1h	2h	4h	5h	6h	8h	10h	12h	Total
MAR_ORF001	hypothetical protein	4668.49	2878.84	881.987	169.542	142.019	153.015	137.111	231.72	136.995	9399.71
MAR_ORF002	hypothetical protein	20.7614	52.5112	280.659	126.82	46.8796	73.8081	43.0757	97.3607	51.0693	792.945
MAR_ORF003	hypothetical protein	130.756	606.315	564.948	60.993	22.3674	13.5832	15.8548	16.8677	13.1579	1444.84
MAR_ORF004	hypothetical protein	345.323	5119.17	5490.78	400.784	368.212	394.6	250.198	345.735	332.694	13047.5
MAR_ORF005	hypothetical protein	6746.8	4643.95	729.161	453.934	527.437	471.759	603.788	303.93	411.891	14892.6
MAR_ORF006	hypothetical protein	28.2407	253.967	256.754	144.906	99.1944	222.308	164.62	197.698	237.924	1605.61
MAR_ORF007	hypothetical protein	305.379	5006.2	10039.2	190.684	195.798	361.88	157.562	90.7943	141.889	16489.3
MAR_ORF008	hypothetical protein	54.1281	1688.48	720.658	39.6766	27.1604	41.2346	48.1305	22.6767	26.629	2668.78
MAR_ORF009	hypothetical protein	728.647	3300.91	1687.16	163.793	168.185	88.813	100.786	202.065	78.8628	6519.22
MAR_ORF010	hypothetical protein	778.274	10999.2	15423.6	765.651	739.937	561.682	613.122	1164.16	1190.21	32235.8
MAR_ORF011	hypothetical protein	0	26.077	171.41	204.051	46.5607	23.5626	59.5902	123.52	42.7966	697.568
MAR_ORF012	hypothetical protein	20.4809	69.0688	115.593	82.5702	46.2461	46.8069	39.4584	57.71	45.3413	523.276
MAR_ORF013	hypothetical protein	19404.1	20589.6	12465.5	454.477	483.949	454.83	387.961	724.791	415.17	55380.3
MAR_ORF014	hypothetical protein	66373.7	22285.8	2559.11	98.0245	83.8776	16.979	59.4554	53.314	61.6775	91592
MAR_ORF015	truncated dUTPase	0	834.101	365.551	401.174	602.055	753.677	455.457	293.578	151.452	3857.05
MAR_ORF016	hypothetical protein	137.124	559.786	264.303	79.3532	54.3208	21.9918	32.087	41.5496	15.9774	1206.49
MAR_ORF017	Dam-like adenine-specific DNA methylase	179.208	1990.04	2825.76	1092.18	1171.57	1544.63	1353.73	1633.94	1500.99	13292
MAR_ORF018	hypothetical protein	54.8403	954.126	1249.78	62.1252	93.8105	102.544	99.0053	114.606	105.771	2836.61
MAR_ORF019	F-box containing protein	10079	6383.6	351.375	59.4332	89.1934	118.783	160.831	285.74	300.316	17828.2
MAR_ORF020	hypothetical protein	481.698	178.294	940.932	2712.77	4828.23	5423.79	9015.71	12994.8	7709.72	44285.9
MAR_ORF021	hypothetical protein	719.52	77.4407	16.4205	8775.34	16500.3	19814.3	19343.6	15478.3	17236.6	97961.9
MAR_ORF022	hypothetical protein	0	63.8886	35.609	22.2189	11.4074	46.1828	40.4296	48.5428	47.5328	315.812
MAR_ORF023	DNA-directed RNA polymerase subunit beta	6654.11	4006.28	460.71	118.223	93.7224	91.2453	95.6083	108.854	95.8269	11724.6
MAR_ORF024	hypothetical protein	489.886	2947.05	5042.52	207.601	159.396	200.203	180.746	298.751	194.876	9721.03
MAR_ORF025	hypothetical protein	34.5323	103.516	41.3511	1783.14	1770.31	1698.24	1683.15	1084.11	1693.2	9891.53
MAR_ORF026	hypothetical protein	401.532	179.22	173.32	6830.14	15641.4	19573.7	15741.3	14842.6	27536.3	100920
MAR_ORF028	F-box containing protein	35029.4	9991.6	573.888	931.356	750.484	737.883	717.736	1155.24	948.133	50835.7
MAR_ORF029	hypothetical protein	1843.28	24116.5	60761.3	27563.4	19258.9	17693	24533	14183.7	22469.1	212422
MAR_ORF030	hypothetical protein	436.305	15914.1	12209.8	572.305	760.491	1224.54	864.405	656.362	1224.33	33862.6
MAR_ORF031	hypothetical protein	140.332	118.312	550.477	596.618	1647.73	1560.81	3335.86	7428.22	5483.36	20861.7
MAR_ORF032	hypothetical protein	12356.4	4777.4	9358.33	1018.96	1155.27	1183.98	1336.21	2636.33	1932.3	35755.2
MAR_ORF033	hypothetical protein	602.263	8046.06	7473.36	790.76	752.188	806.686	665	803.368	1106.21	21045.9
MAR_ORF034	hypothetical protein	339.974	9659.63	10404.9	1166.84	963.766	1035.97	1110.33	1152.03	1039.28	26872.7
MAR_ORF035	hypothetical protein	709.423	4064.4	11685.7	3616.48	3555.7	4876.21	5486.2	15087.1	13727.4	62808.7
MAR_ORF036	highly derived D5-like helicase-primase	48.8293	210.587	257.365	575.433	453.75	426.346	509.893	700.431	599.747	3782.38
MAR_ORF037	hypothetical protein	70.0849	73.8596	114.103	1021.04	1463.83	1628.41	2272.06	4736.72	3801.33	15181.4
MAR_ORF038	hypothetical protein	49.4213	2013.88	998.769	193.208	111.594	75.298	87.8905	219.071	234.017	3983.15
MAR_ORF039	F-box containing protein	41100	9091.17	363.517	198.919	173.423	171.625	183.633	259.28	400.515	51942.1
MAR_ORF040	restriction endonuclease	228.569	2893.52	2992.26	1353.24	1820.94	2303.78	1982.4	2810.58	3030.24	19415.5
MAR_ORF041	hypothetical protein	182.915	220.305	113.447	3313.68	7532.79	12461.4	9061.82	4509.97	15368.6	52764.9
MAR_ORF042	F-box containing protein	35950.7	9596.22	384.234	197.901	87.7489	107.51	136.402	192.301	243.38	46896.4
MAR_ORF043	hypothetical protein	38.8612	114.672	183.603	291.979	394.87	451.466	538.486	812.592	1195.49	4022.02
MAR_ORF044	hypothetical protein	145.885	126.411	245.893	2242.68	4129.83	4260.17	4899.36	6116.57	8892.02	31058.8
MAR_ORF045	hypothetical protein	229.514	96.7504	86.304	5264.66	8774.43	9571.17	9614.21	7856.19	13368.5	54861.7
MAR_ORF046	hypothetical protein	32.9475	1277.77	774.109	88.5535	74.3958	133.863	94.4009	163.858	158.037	2797.94
MAR_ORF047	hypothetical protein	15.4652	91.2694	83.7301	34.0085	46.5607	23.5626	27.5032	50.7875	48.5028	421.39
MAR_ORF048	hypothetical protein	272.805	1827.21	2708.99	1755.29	1705.4	1801.13	1457.71	1889.18	1709.78	15127.5
MAR_ORF049	hypothetical protein	52.9252	133.862	496.413	172.814	133.991	197.926	168.279	281.289	228.122	1865.62
MAR_ORF050	hypothetical protein	179.714	1065.65	715.668	79.0395	139.774	141.469	174.006	243.358	158.037	2896.72
MAR_ORF051	hypothetical protein	748.878	0	27470.8	5776.91	3288	1942.39	1463.92	2967.51	2305.91	45964.4
MAR_ORF052	DNA-directed RNA polymerase subunit alpha	1554.01	1460.5	204.99	87.884	83.2992	74.9416	71.0731	99.8975	88.4753	3725.07
MAR_ORF053	hypothetical protein	196.829	232.322	27.1441	28.8557	44.4443	29.9888	46.672	13.5661	25.4186	645.241
MAR_ORF054	hypothetical protein	898.125	1064.81	100.347	144.011	232.372	406.237	141.421	138.824	88.0236	3214.17
MAR_ORF055	DNA-directed RNA polymerase subunit alpha	8422.63	4938.83	707.757	42.4707	50.4954	53.4308	53.3277	46.3632	42.1938	14357.5
MAR_ORF056	hypothetical protein	472.39	8239.14	12101.7	627.611	562.961	524.804	347.123	341.947	430.3	23648
MAR_ORF057	hypothetical protein	77.7223	196.58	101.23	128.186	87.7489	133.22	149.739	120.53	107.54	1102.5
MAR_ORF058	hypothetical protein	3298.07	2989.5	183.547	97.819	57.3955	58.0915	67.8065	35.554	24.6193	6812.4
MAR_ORF059	hypothetical protein	66.3069	263.54	306.741	2430.19	2452.58	2193.68	3018.19	2763.18	1576.27	15070.7
MAR_ORF060	hypothetical protein	18672.8	8870.69	1506.04	42.7286	51.1869	118.417	95.0269	156.374	186.403	29699.7
MAR_ORF061	hypothetical protein	1673.05	3036.78	787.178	43.2836	74.0738	59.9776	5.834	15.9602	7.26246	5703.4
MAR_ORF062	hypothetical protein	245.985	40.1394	10122.2	820.121	388.209	211.57	256.36	346.16	304.491	12735.2
MAR_ORF063	hypothetical protein	66.6191	1853.47	2435.47	219.747	200.569	203.001	301.124	424.725	221.226	5925.95
MAR_ORF064	hypothetical protein	473.62	1018.22	10543.6	1544.91	855.552	577.285	245.666	353.318	672.798	16285
MAR_ORF065	hypothetical protein	161.662	136.296	1153.94	548.066	425.875	338.674	347.395	404.729	391.446	3908.08
MAR_ORF066	hypothetical protein	122.671	100.087	155.63	1580.85	2656.75	3463.71	3050.7	4024.03	5604.5	20758.9
MAR_ORF067	hypothetical protein	110.511	33.2753	22.7798	4759.12	7028.6	7480.65	7255.34	4937.01	6123.63	37750.9
MAR_ORF068	F-box containing protein	1515.59	277.381	15.1516	3.95354	4.05956	4.10879	4.79592	5.46678	5.9702	1836.47
MAR_ORF069	hypothetical protein	199.728	673.554	2714.18	1980.75	2918.16	4555.63	2695.31	5156.75	3632.69	24526.8
MAR_ORF070	zinc finger protein	26.2601	645.212	641.322	181.491	302.126	242.917	303.556	412.331	313.517	3068.73
MAR_ORF071	hypothetical protein	57.1919	216.98	373.909	62.8836	64.57	65.353	50.8549	5.79685	10.5511	908.091
MAR_ORF072	ATP-dependent DNA ligase	52.2616	2067.72	1344.39	65.6716	78.6715	68.2504	88.5159	100.948	70.9342	3937.37
MAR_ORF073	hypothetical protein	87.0438	129.504	111.409	4387.48	8559.37	10695.4	7745.98	2997.81	8524.16	43238.1
MAR_ORF074	metal dependent phosphohydrolase	51.0053	2438.82	1965.05	154.891	126.139	144.321	110.145	154.503	90.0649	5234.94
MAR_ORF075	hypothetical protein	51.9036	1085.23	954.381	418.506	257.838	150.252	292.3	472.634	158.953	3842
MAR_ORF076	hypothetical protein	0	244.28	151.407	114.362	100.653	152.811	171.76	179.822	53.4538	1168.55
MAR_ORF077	hypothetical protein	616.227	954.819	706.055	3638.04	4951.55	7193.85	3741.84	3713.13	4178.71	29694.2
MAR_ORF078	hypothetical protein	242.829	360.035	775.392	6113.26	8420.02	10269.9	11101.4	8182.59	7156.95	52622.4
MAR_ORF079	translation initiation factor SUI1	63.1494	13.3101	378.184	497.611	891.2	817.82	781.453	1588.65	1112.59	6143.97
MAR_ORF080	hypothetical protein	20.9046	0	9.60963	68.9552	47.2029	47.7753	12.3922	314.861	61.7058	583.407
MAR_ORF081	nucleoside deaminase	5082.76	3256.76	305.867	311.606	862.508	1154.57	624.523	831.778	385.309	12815.7
MAR_ORF082	hypothetical protein	366.267	5419.88	12808.3	2305.21	2405.05	2068.6	1849.28	2212.08	1672.97	31107.6
MAR_ORF083	hypothetical protein	67.1462	250.702	680.04	421.878	252.695	138.841	145.001	232.175	173.426	2361.9
MAR_ORF084	serine/threonine protein kinase	2991.75	4786.11	830.265	173.384	204.409	203.551	194.748	165.515	185.864	9735.59
MAR_ORF085	hypothetical protein	225.29	1243.24	758.417	480.408	184.984	249.637	188.186	105.456	196.479	3632.09
MAR_ORF086	hypothetical protein	3280.69	3957.98	1005.4	142.255	90.4242	147.841	164.348	252.156	115.934	9157.02
MAR_ORF087	hypothetical protein	87.2279	781.371	1960.33	399.62	221.582	207.656	138.967	103.885	168.97	4069.61
MAR_ORF088	hypothetical protein	0	70.9873	147.296	262.306	63.3742	16.0357	18.7174	53.7658	27.1838	659.666
MAR_ORF089	hypothetical protein	10.1717	480.236	424.981	44.736	38.2797	23.2464	18.0893	38.3526	61.9258	1140.02
MAR_ORF090	hypothetical protein	505.195	523.065	503.397	552.224	453.626	452.375	830.134	1616.66	806.111	6242.78
MAR_ORF091	hypothetical protein	30.5151	111.483	107.544	693.408	352.174	240.212	391.935	614.054	281.481	2822.81
MAR_ORF092	HTH-containing DNA-binding protein	785.051	7905.64	5521.79	471.552	484.197	465.15	445.987	114.494	289.662	16483.5
MAR_ORF093	hypothetical protein	2058.48	4929.91	12827.1	455.985	366.057	430.809	368.761	788.718	736.57	22962.4
MAR_ORF094	hypothetical protein	588.286	1361.84	595.86	80.3973	45.0291	53.1709	14.7769	21.4255	34.9506	2795.73
MAR_ORF095	hypothetical protein	522.035	3144.74	6645.29	296.252	304.196	436.171	284.505	344.443	369.699	12347.3
MAR_ORF096	hypothetical protein	3523.24	3526.32	173.923	21.6418	14.8148	7.4972	11.668	16.3592	19.9718	7315.44
MAR_ORF097	putative antitoxin	769.451	1454.69	1474.97	564.018	272.022	230.914	469.951	537.894	266.7	6040.62
MAR_ORF098	toxin of RelE/StbE family	0	90.4617	156.192	39.3255	0	30.6523	43.7292	49.4836	44.5388	454.383
MAR_ORF099	flavin-containing amine oxidoreductase	219.895	108.382	133.914	1063.83	1408.1	1353.01	1627.41	1689.92	1517.23	9121.69
MAR_ORF100	hypothetical protein	0	193.948	72.5727	29.7574	30.5554	20.6173	8.02176	4.93768	2.49647	362.906
MAR_ORF101	hypothetical protein	41.637	49.1451	659.694	604.305	200.569	126.876	125.88	179.951	127.512	2115.57
MAR_ORF102	hypothetical protein	0	0	7.25727	34.717	11.8827	12.0268	9.35871	14.0815	26.2129	115.537
MAR_ORF103	hypothetical protein	49.5752	53.7381	54.26	62.296	47.9749	53.9518	73.4703	111.408	54.8757	561.55
MAR_ORF104	hypothetical protein	15.1181	0	4.24698	847.753	765.232	800.424	750.564	714.528	675.653	4573.52
MAR_ORF105	hypothetical protein	76.7385	1754.91	1277.77	780.474	714.765	716.125	750.593	786.75	537.973	7396.1
MAR_ORF106	F-box containing protein	46.3279	546.819	860.309	276.523	144.46	131.086	127.507	164.484	109.888	2407.41
MAR_ORF107	hypothetical protein	50.8586	1200.59	1336.77	1103.49	1561.81	2068.93	1745.62	1819.89	1696.39	12584.3
MAR_ORF108	hypothetical protein	26.9437	300.986	227.416	49.3753	40.5595	46.1828	29.9479	118.251	78.2893	917.951
MAR_ORF109	hypothetical protein	925.687	260.145	24676.5	29569.7	17876.1	9340.26	5807.56	5874.96	10733.8	105065
MAR_ORF110	hypothetical protein	146.67	2404.41	3029.01	501.717	466.107	720.054	574.806	759.824	622.346	9224.95
MAR_ORF111	hypothetical protein	117.228	1143.64	2524.62	491.025	535.705	395.488	508.783	547.249	684.336	6948.08
MAR_ORF112	hypothetical protein	40.4156	1033.58	233.609	444.378	324.476	389.988	513.107	286.205	331.797	3597.55
MAR_ORF113	hypothetical protein	36.9655	7.79129	26.433	4572.48	4277.76	4364.83	4475.75	4095.57	3870.14	25727.7
MAR_ORF114	hypothetical protein	79.4977	69.1856	448.878	661.679	517.288	535.282	479.622	654.807	740.881	4187.12
MAR_ORF115	hypothetical protein	0	0	2.90291	55.5472	0	28.8642	22.4609	17.6659	17.4753	144.916
MAR_ORF116	hypothetical protein	93.6598	50.2495	2642.41	4693.43	2159.71	947.006	1276.99	1401.54	871.801	14136.8
MAR_ORF117	hypothetical protein	50.102	232.322	875.831	1377.2	1338.72	1431.28	1136.04	924.747	1548.22	8914.47
MAR_ORF118	SMC1 family ATPase	96.4113	820.96	2007.56	725.082	368.635	277.625	368.633	518.778	399.13	5582.82
MAR_ORF119	hypothetical protein	6.39488	5.39144	156.782	234.376	264.728	258.195	314.642	359.605	202.92	1803.03
MAR_ORF120	small membrane protein	14.1644	0	9.40506	155.74	159.916	140.275	205.717	210.182	122.817	1018.22
MAR_ORF121	small membrane protein	40.2368	11.3077	32.1974	865.16	1160.93	929.786	1244.29	1099.51	1479.68	6863.1
MAR_ORF122	serine/threonine protein kinase	48.756	1715.07	845.691	766.483	470.817	336.651	303.169	261.096	318.454	5066.18
MAR_ORF123	hypothetical protein	818.416	8228.85	24632.1	6021.32	4985.02	5865.21	3180.47	3847.79	3671.21	61250.4
MAR_ORF124	MORN repeat-containing protein	1479.92	526.141	12.2947	0	13.4204	13.5832	13.2123	10.1206	11.5131	2080.21
MAR_ORF125	hypothetical protein	59.4347	676.467	567.68	304.965	268.408	339.579	211.397	224.1	142.543	2794.57
MAR_ORF126	hypothetical protein	53.8875	1726.41	1394.77	192.564	141.958	133.417	91.8402	46.9725	57.1636	3838.99
MAR_ORF127	hypothetical protein	16.3847	27.6275	1270.38	318.271	154.154	99.8546	41.2795	26.9037	66.5005	2021.35
MAR_ORF128	hypothetical protein	686.11	1346.84	670.023	45.0383	30.8307	31.2046	27.3173	28.6474	11.3353	2877.35
MAR_ORF129	ribonuclease H	9894	6613.82	1407.02	125.177	64.2668	73.1769	82.2512	110.344	57.1023	18427.2
MAR_ORF130	eukaryotic peptide chain release translation termination factor 1	55.2557	123.119	84.6681	399.246	207.947	177.395	266.723	217.624	128.88	1660.86
MAR_ORF131	DHH family phosphohydrolase	11.144	620.095	247.032	118.446	62.9082	42.4474	52.8492	56.4767	57.5656	1268.96
MAR_ORF132	hypothetical protein	102.593	2414.01	1710.42	136.732	133.378	191.836	117.488	98.5037	129.048	5034.01
MAR_ORF133	hypothetical protein	96.9975	1103.99	2342.45	399.94	501.924	480.301	483.359	817.978	582.696	6809.64
MAR_ORF134	hypothetical protein	58.5419	1299.71	1882.78	300.384	225.21	287.403	208.221	336.242	228.004	4826.49
MAR_ORF135	hypothetical protein	45.1067	2859.78	2259.66	178.545	88.2712	48.107	56.1523	72.785	76.5584	5684.96
MAR_ORF136	hypothetical protein	39.1962	99.1375	128.796	392.661	442.527	437.94	627.357	814.168	643.572	3625.35
MAR_ORF137	hypothetical protein	45.7289	2263.64	2451.12	81.4054	83.5884	84.602	36.7894	51.1172	47.0025	5144.99
MAR_ORF138	hypothetical protein	954.258	4117.26	2229.62	534.899	239.414	156.793	244.02	493.09	200.211	9169.57
MAR_ORF139	hypothetical protein	12.5949	127.423	266.113	138.483	72.6785	76.7581	124.437	201.702	82.0999	1102.29
MAR_ORF140	hypothetical protein	0	11.8312	10.0347	10.2865	10.5624	21.3809	4.15943	5.6895	15.5336	89.4783
MAR_ORF141	hypothetical protein	1604.74	2861.21	2979.26	309.322	402.613	412.023	269.531	453.259	564.691	9856.64
MAR_ORF142	hypothetical protein	84.1992	1230.45	1016.38	36.0028	10.5624	32.0714	27.0363	27.8786	27.1838	2491.76
MAR_ORF143	hypothetical protein	186.853	3879.99	4186.55	131.893	151.056	200.336	143.586	179.57	145.548	9205.38
MAR_ORF144	hypothetical protein	7514.78	10674.7	3081.6	83.3208	118.827	153.943	87.9719	133.902	140.967	21990
MAR_ORF145	hypothetical protein	216.512	766.663	454.512	317.413	293.332	131.951	269.531	646.945	147.791	3244.65
MAR_ORF146	F-box containing protein	3104.85	3079.08	546.177	138.868	95.0613	128.285	131.022	161.724	133.977	7519.04
MAR_ORF147	hypothetical protein	44431.6	36392.2	2414.44	140.626	93.858	116.918	85.2946	76.6138	58.3984	83810
MAR_ORF148	hypothetical protein	1373.18	943.322	689.944	74.56	61.2476	54.2415	84.4169	161.658	90.0739	3532.65
MAR_ORF149	hypothetical protein	21.807	43.6649	68.7787	261.751	252.357	257.494	250.463	145.328	321.847	1623.49
MAR_ORF150	hypothetical protein	0	11.3077	313.069	49.1568	30.285	61.3046	31.8031	30.9952	22.2694	550.191
MAR_ORF151	F-box containing protein	3725.41	3882.78	640.263	28.6695	44.1575	59.5907	40.5746	100.297	86.5872	8608.32
MAR_ORF152	D5 family helicase-primase	26.8245	491.886	329.938	366.218	310.422	324.403	392.569	536.639	342.083	3120.98
MAR_ORF153	hypothetical protein	20064.5	8081.43	780.175	45.5985	68.1036	73.2376	65.3713	143.299	128.326	29450.1
MAR_ORF154	zinc-ribbon-containing protein	0	0	284.351	802.96	587.31	548.706	760.558	866.337	545.367	4395.59
MAR_ORF155	hypothetical protein	33.931	4519.88	2794.88	207.266	153.233	232.637	107.276	51.3584	89.7238	8190.18
MAR_ORF156	restriction endonuclease	14.2175	755.156	508.472	131.312	117.712	121.306	100.295	138.111	110.163	1996.74
MAR_ORF157	A32-like packaging ATPase	0	4.9526	121.817	1171.23	229.916	143.202	167.151	159.571	176.649	2174.49
MAR_ORF158	hypothetical protein	0	15.775	58.7749	342.884	70.4158	42.7618	72.0968	51.5848	20.7114	675.005
MAR_ORF159	hypothetical protein	55.5715	1818.7	1571.44	433.268	380.245	415.645	467.187	580.671	383.058	6105.78
MAR_ORF160	serine/threonine protein kinase	18.7883	1251.37	685.182	78.0416	136.7	104.961	172.633	256.451	235.7	2939.83
MAR_ORF161	mannosyltransferase OCH1-like protein	155.139	2817.13	5271.86	559.846	458.091	563.648	459.83	900.895	827.806	12014.3
MAR_ORF162	mannosyltransferase OCH1-like protein	45.0174	105.427	62.082	241.988	323.773	293.405	292.066	280.262	214.087	1858.11
MAR_ORF163	translation elongation factor EF-1alpha	10.8256	51.7193	83.4932	243.35	206.419	118.206	135.835	241.251	150.454	1241.55
MAR_ORF164	hypothetical protein	45.2414	38.1424	56.6139	248.719	178.772	215.405	234.666	345.752	242.046	1605.36
MAR_ORF165	small membrane protein	43.3024	0	6.63522	571.343	358.517	65.9754	532.645	939.256	351.503	2869.18
MAR_ORF166	histone 2A-domain-containing protein	143.487	158.776	164.441	2484.83	3982.45	5274.13	4906.85	6485.71	5238.04	28838.7
MAR_ORF167	hypothetical protein	108.964	4868.9	4261.39	272.29	227.402	230.159	217.269	300.807	219.298	10706.5
MAR_ORF168	hypothetical protein	85.1453	531.209	660.167	1085.98	1102.28	843.225	1226.52	979.004	684.874	7198.4
MAR_ORF169	hypothetical protein	17.9359	37.8039	1295.83	690.232	769.491	765.158	582.123	320.322	895.065	5373.96
MAR_ORF170	hypothetical protein	72.1707	304.231	1358.99	4708.29	2915.21	1136.24	812.871	698.346	905.386	12911.7
MAR_ORF171	hypothetical protein	3936.83	4628.03	944.979	130.965	190.123	103.254	126	113.152	70.4694	10243.8
MAR_ORF172	hypothetical protein	0	76.806	35.1099	30.3537	18.7006	0	7.36423	18.8033	6.11157	193.249
MAR_ORF173	DNA topoisomerase II	95.9407	812.382	2591.92	699.182	398.734	272.224	306.21	372.062	351.943	5900.59
MAR_ORF174	hypothetical protein	4640.02	5700.83	7714.89	632.384	737.091	1403.25	898.437	884.832	804.401	23416.1
MAR_ORF175	hypothetical protein	90.6057	1604.16	3170.48	833.208	1128.34	1411.84	1313.48	1635.35	1559.1	12746.6
MAR_ORF176	hypothetical protein	12.4228	31.4206	178.933	173.016	46.7515	37.8547	25.7748	42.3075	45.8368	594.318
MAR_ORF177	hypothetical protein	0	16.1743	20.5776	14.0626	72.1985	14.6148	5.68631	4.66683	17.6965	165.677
MAR_ORF178	hypothetical protein	6882.94	3642.71	309.644	30.6891	69.3265	44.6518	29.7824	32.251	26.2612	11068.2
MAR_ORF179	hypothetical protein	7311.18	4446.65	289.207	44.4378	18.2518	46.1828	28.75	9.83146	15.6579	12210.1
MAR_ORF180	hypothetical protein	60.0232	75.9072	465.998	54.9973	67.7665	57.1569	71.1633	37.1113	22.1469	912.271
MAR_ORF181	putative nuclease	241.946	11673.1	9182.52	522.01	357.339	382.538	227.315	395.516	314.976	23297.3
MAR_ORF182	hypothetical protein	12.6299	223.61	502.526	157.384	209.135	240.535	131.022	125.966	111.842	1714.65
MAR_ORF183	hypothetical protein	23.6349	129.521	572.509	521.906	360.232	319.588	347.641	427.851	338.469	3041.35
MAR_ORF184	helicase origin-binding-protein	58.0931	139.314	442.31	202.506	203.078	179.971	221.931	343.033	208.393	1998.63
MAR_ORF185	hypothetical protein	134.123	576.694	985.105	2438.18	1241.69	572.176	433.317	724.309	536.94	7642.53
MAR_ORF186	hypothetical protein	19373.1	6888.86	3673.09	289.812	231.454	150.596	214.844	424.783	384.963	31631.5
MAR_ORF187	hypothetical protein	32445.3	21399.6	1464.04	237.289	254.727	280.235	130.84	101.417	217.169	56530.6
MAR_ORF188	hypothetical protein	13.841	163.368	64.3323	116.675	98.968	100.168	108.715	96.2383	62.5599	824.865
MAR_ORF189	class 3 lipase	146.997	59.8288	300.582	4863.63	8133.94	10055.2	7519.52	6028.14	7301.51	44409.3
MAR_ORF190	hypothetical protein	23.8675	30.1836	31.6958	69.9808	53.893	72.7288	84.8916	100.637	55.0403	522.918
MAR_ORF191	serine/threonine protein kinase	37467.4	5184.1	598.552	87.2885	85.5552	119.58	93.0524	176.659	292.586	44104.8
MAR_ORF192	hypothetical protein	16.6548	203.601	692.87	640.93	181.766	139.563	148.094	201.896	216.617	2441.99
MAR_ORF193	zinc finger protein	384.803	73.9912	2350.95	13831.1	16722.3	14790.8	16326.9	15746.8	17849.9	98077.6
MAR_ORF194	hypothetical protein	30.3584	67.9247	87.6687	860.169	1091.52	1153.68	1308.2	1059.27	1233.88	6892.67
MAR_ORF195	serine/threonine protein kinase	68.3256	1361.56	1623.41	150.251	65.4521	56.7821	18.4106	37.2709	17.1888	3398.65
MAR_ORF196	hypothetical protein	202.078	212.962	3931.61	6850.82	4829.12	4413.02	3703.56	2904.38	4582.41	31630
MAR_ORF197	RNA ligase	151.19	195.863	4881.22	1759.67	849.307	544.979	451.404	629.417	734.727	10197.8
MAR_ORF198	hypothetical protein	44.2507	9.3268	23.7318	1119.05	940.899	682.628	901.716	916.317	495.941	5133.86
MAR_ORF199	serine/threonine protein kinase	33213.1	4148.38	662.764	277.736	261.744	173.976	124.612	68.1805	105.33	39035.8
MAR_ORF200	hypothetical protein	34.9079	39.2406	594.623	1748.51	1353.12	1037.12	1225.22	1524.37	1130.76	8687.87
MAR_ORF201	hypothetical protein	11.5694	0	5.90923	59.3634	8.70791	26.4405	24.004	26.2673	32.0158	194.278
MAR_ORF202	hypothetical protein	222.471	128.949	85.9332	234.419	146.517	42.3695	119.517	273.409	82.0857	1335.67
MAR_ORF203	D6/D11-like helicase	52.9377	36.3661	37.5538	945.668	1154.02	1069.43	1306.98	1967.25	1305.06	7875.26
MAR_ORF204	hypothetical protein	306.621	118.175	2365.28	5349.23	4912.42	5339.05	5686.64	9015.96	4856.71	37950.1
MAR_ORF205	hypothetical protein	147.672	124.501	359.663	4289.95	5867.48	7187.93	6176.18	4011.36	5312.49	33477.2
MAR_ORF206	RING finger E3 ubiquitin protein ligase	0	29.487	76.2199	384.558	508.944	674.979	549.429	405.548	320.47	2949.63
MAR_ORF207	hypothetical protein	258.149	344.016	155.672	1226.92	1441.59	1370.26	1169.94	1658.38	1066.18	8691.12
MAR_ORF208	hypothetical protein	104.011	238.016	680.76	773.304	480.899	532.007	352.328	471.091	391.995	4024.41
MAR_ORF209	hypothetical protein	103.335	96.8009	2129.39	1405.51	1261.72	1460.7	976.709	950.561	1381.08	9765.81
MAR_ORF210	Rossmann-fold nucleotide-binding protein	17.2226	312.183	252.025	31.5609	19.4444	19.6802	28.0761	41.5463	47.6599	769.398
MAR_ORF211	ribonucleoside diphosphate reductase alpha subunit	62.8051	1274.99	1393.56	923.162	582.186	480.966	553.072	483.733	506.154	6260.63
MAR_ORF212	proliferating cell nuclear antigen	86.1704	158.119	724.918	2307.35	1369.65	776.148	518.329	582.202	710.7	7233.58
MAR_ORF213	transcription initiation factor TFIIB	107.851	1713.27	1585.91	1780.84	965.567	735.119	1105.38	1567	1853.56	11414.5
MAR_ORF214	hypothetical protein	0	16.8128	81.4851	146.177	165.107	45.5751	29.5538	93.787	18.395	596.892
MAR_ORF215	hypothetical protein	56.1328	75.7198	1847.54	2386.47	1174.54	752.608	296.151	400.996	766.324	7756.48
MAR_ORF216	RuvC-like Holliday junction resolvase	56.9234	11.9979	816.267	584.159	198.156	162.615	160.284	255.306	106.328	2352.04
MAR_ORF217	dNMP kinase	86.8807	252.299	5187.02	1719.49	1387.77	860.411	1081.56	1268.85	1271.58	13115.9
MAR_ORF218	hypothetical protein	57.1919	12.0545	59.1536	597.395	882.456	838.696	991.671	1296.76	1255.58	5990.96
MAR_ORF219	hypothetical protein	792.554	105.504	12744.4	84839.5	47324.8	22148.7	20212.8	17578	19582.6	225329
MAR_ORF220	hypothetical protein	28.596	48.2178	48.1992	1488.25	2238.43	2962.67	2551.22	2898.43	2426.76	14690.8
MAR_ORF221	hypothetical protein	62.2843	70.0149	1440.41	9085.4	2463.78	1112.39	1554.83	2450.01	1147.78	19386.9
MAR_ORF222	transcription factor S-II-domain-containing protein RNAP subunit	34353.3	11227.4	1432.62	148.126	136.888	123.154	164.713	163.038	147.258	47896.4
MAR_ORF223	class 3 lipase	8.76061	44.3158	74.2786	256.866	240.676	200.214	180.466	244.899	192.329	1442.8
MAR_ORF224	hypothetical protein	6.08669	5.13161	25.4927	428.316	554.334	454.409	481.692	405.943	440.181	2801.58
MAR_ORF225	hypothetical protein	25.9074	480.53	785.357	208.896	185.248	108.549	142.06	190.117	172.064	2298.73
MAR_ORF226	hypothetical protein	299.659	131.178	284.134	4590.21	7090.2	8240.02	8299.44	11759.9	8881.78	49576.5
MAR_ORF227	putative RNA methyltransferase	159.535	36.6824	2741.23	11194.5	5518.11	3364.27	2130.03	1231.87	2333.16	28709.4
MAR_ORF228	patatin-like phospholipase	5.13758	12.9943	106.801	256.082	232.014	219.172	165.982	171.217	125.111	1294.51
MAR_ORF229	hypothetical protein	24.1849	118.942	281.232	2523.26	1577.61	875.139	781.353	1372.74	1321.43	8875.9
MAR_ORF230	hypothetical protein	81.6085	98.2901	447.395	1703.45	2135.22	2048.62	2517.93	2473.31	2481.31	13987.1
MAR_ORF231	thioredoxin	157.621	112.444	3205.43	14566.7	19456.4	17346.2	11776.7	6519.73	9470.76	82612
MAR_ORF232	hypothetical protein	20.4809	112.237	578.489	52.5447	200.4	202.83	121.41	151.541	236.152	1676.08
MAR_ORF233	hypothetical protein	135.499	3334.05	6745	481.9	407.945	462.592	354.02	484.248	382.373	12787.6
MAR_ORF234	hypothetical protein	228.074	775.347	995.068	474.578	448.542	358.701	368.533	262.789	355.614	4267.25
MAR_ORF235	hypothetical protein	140.332	47.3249	6.45091	1429.83	1299.17	930.07	1135.52	3117.28	1113.24	9219.22
MAR_ORF236	thymidine kinase	16.2095	327.984	341.519	196.049	140.304	123.483	62.4582	105.807	92.7031	1406.52
MAR_ORF237	zinc finger/DNA-binding protein	47.1166	191.997	1626.83	690.743	620.608	604.205	430.598	846.244	901.109	5959.45
MAR_ORF238	hypothetical protein	18.8271	7.93647	8.65463	1904.48	1388.72	1405.56	1688.06	1221.3	894.387	8537.92
MAR_ORF239	hypothetical protein	162.747	214.391	334.581	3709.36	6928.63	8171.09	6557.38	8129.1	7432.04	41639.3
MAR_ORF240	hypothetical protein	196.582	2020.91	4594.45	2463.6	3274.25	3859.84	2447.21	3064.36	3380.99	25302.2
MAR_ORF241	D6/D11-like helicase	104.455	110.497	273.958	2441.48	2487.66	2713.76	3178.41	2959.75	2683.33	16953.3
MAR_ORF242	NUDIX hydrolase	19017	8929.19	309.644	105.804	108.642	137.449	128.348	136.06	124.823	28997
MAR_ORF243	hypothetical protein	13.6539	287.786	228.048	710.604	246.646	239.235	141.645	110.715	80.6067	2058.94
MAR_ORF244	ribonuclease III	5026.13	3078.08	879.714	1540.42	2077.38	2279.63	2151.37	3190.91	2358.33	22581.9
MAR_ORF245	restriction endonuclease	63.6546	1058	925.215	375.499	187.081	219.368	127.578	160.13	201.315	3317.84
MAR_ORF246	hypothetical protein	13.6539	707.955	186.205	40.034	10.2769	5.20076	8.09402	10.2411	12.5948	994.255
MAR_ORF247	ubiquitin	358.954	386.694	3464.14	6358.7	4803.1	4162.53	4373.97	9088.44	5765	38761.5
MAR_ORF248	hypothetical protein	141.283	967.353	2494.86	696.694	921.612	1050.2	982.189	1638.23	1371.96	10264.4
MAR_ORF249	MutH/Vsr/archaeal HJR-like endonuclease	224.994	4357.6	7045.51	774.225	957.277	1097.44	935.486	839.475	909.147	17141.1
MAR_ORF250	hypothetical protein	202.078	227.159	93.7532	15713.7	20837.4	21500.6	16581.1	9799.37	10733.7	95689
MAR_ORF251	hypothetical protein	0	60.8463	373.231	330.638	190.123	274.897	171.131	104.606	166.431	1671.9
MAR_ORF252	hypothetical protein	54.1281	2296.95	1692.9	224.834	135.802	123.704	128.348	122.893	73.2298	4852.79
MAR_ORF253	hypothetical protein	16.6243	355.066	325.211	158.416	118.87	86.5399	114.974	64.4797	70.5401	1310.72
MAR_ORF254	hypothetical protein	56.1328	830.815	1324.27	109.723	84.499	114.032	97.9777	200.776	180.65	2998.87
MAR_ORF255	hypothetical protein	14528.7	8356.92	4403.08	711.898	848.996	706.676	726.753	591.512	836.403	31711
MAR_ORF256	hypothetical protein	272.465	229.712	136.556	24.965	25.6345	12.9727	10.0948	27.6165	78.5406	818.557
MAR_ORF257	hypothetical protein	18.7109	15.775	11.4683	2400.19	2042.06	2266.38	1353.2	1000.59	1204.72	10313.1
MAR_ORF258	alkylated DNA repair protein	312.256	841.146	483.915	44.6611	45.8587	69.6223	56.4345	37.6708	56.2019	1947.77
MAR_ORF259	hypothetical protein	15.9535	699.412	565.507	111.094	120.077	151.917	96.9366	68.2381	58.8641	1888
MAR_ORF260	divergent serine/threonine protein kinase	19.8765	29.3259	36.6327	792.838	962.457	1064.98	1047.19	874.423	1010.24	5837.97
MAR_ORF261	hypothetical protein	0	44.5734	62.1087	206.687	252.023	295.355	250.726	325.81	211.329	1648.61
MAR_ORF262	hypothetical protein	0	0	0	531.321	173.59	163.146	288.086	266.491	69.9011	1492.54
MAR_ORF263	hypothetical protein	35.8526	175.865	215.752	661.788	944.48	804.474	741.935	1003.63	1134.05	5717.83
MAR_ORF264	serine/threonine protein kinase catalytic domain-containing protein	71.6831	80.5802	103.738	1246.06	1397.66	1471.82	1247.49	1469.05	1131.01	8219.08
MAR_ORF265	hypothetical protein	0	0	50.0894	235.259	181.176	169.79	129.481	35.0607	131.579	932.433
MAR_ORF266	hypothetical protein	47.362	0	1488.95	954.718	552.544	342.763	315.857	438.767	655.323	4796.28
MAR_ORF267	hypothetical protein	39.2639	172.135	159.635	1985.89	2730.67	3834.61	2765.14	1333.68	1796.42	14817.4
MAR_ORF268	ribonucleotide reductase small chain	113.264	3601.41	4830.05	2024.21	1997.3	2153	1851.23	1334.55	1302.5	19207.5
MAR_ORF269	chaperone protein DnaJ	10.8256	73.0155	46.4465	111.094	81.4811	65.9754	117.118	117.188	180.744	803.888
MAR_ORF270	superfamily II helicase	78.9759	1826.29	1566.27	228.805	99.0714	106.003	103.666	80.6582	72.8498	4162.6
MAR_ORF271	hypothetical protein	42.4931	203.01	447.826	1131.71	938.175	809.277	932.023	1987.54	655.895	7147.95
MAR_ORF272	membrane protein	22.2064	60.8463	27.2214	1420.22	1520.98	1163.03	1253.86	902.343	1135.83	7506.54
MAR_ORF273	membrane protein	22.894	11.581	11.6935	946.484	899.493	725.53	1122.37	933.766	738.291	5412.1
MAR_ORF274	hypothetical protein	0	11.5635	30.1237	211.13	268.408	208.972	236.805	277.9	184.084	1428.99
MAR_ORF275	hypothetical protein	0	0	7.61418	72.8488	112.204	113.564	117.828	88.6443	73.3389	586.042
MAR_ORF276	papain-like cysteine peptidase	70.356	22.2436	21.4115	6238.05	5919.91	5562.92	6290.79	3596.11	4335.22	32057
MAR_ORF277	NUDIX hydrolase	130.654	1927.67	1890.56	2015.98	1824.19	1647.25	1556.77	2091.04	1273.89	14358
MAR_ORF278	metallopeptidase WLM	21.0498	124.228	57.5206	995.221	1196.19	1234.75	1001.38	1149.56	1159.19	6939.1
MAR_ORF279	bacterial MORN repeat-containing protein	1314.99	526.141	78.1698	212.386	251.633	141.491	167.356	284.341	117.872	3094.38
MAR_ORF280	hypothetical protein	187.772	214.847	859.74	2035.09	2331.95	2452.18	2126.83	1613.38	2009.19	13831
MAR_ORF281	membrane-bound metal-dependent hydrolase	74.1895	44.6773	473.668	1577.08	2169.79	1824.7	1859.7	1352.26	1618.97	10995
MAR_ORF282	glycosyltransferase	3002.26	2906.98	551.106	109.505	99.7464	110.134	109.983	163.727	108.019	7161.46
MAR_ORF283	hypothetical protein	98.4146	199.133	306.628	72.1393	59.259	14.9944	64.174	58.2546	36.3123	909.309
MAR_ORF284	hypothetical protein	30.9303	130.385	164.301	192.715	81.4811	35.344	18.3354	48.9065	42.7966	745.194
MAR_ORF285	papain-like cysteine peptidase	55.2377	29.1064	77.0582	1708.17	2125.56	1909.38	1989.25	1104.92	1591.64	10590.3
MAR_ORF286	hypothetical protein	325.78	155.243	2186.31	6364.57	3795.35	2600.48	3942.21	2698.48	2359.65	24428.1
MAR_ORF287	hypothetical protein	175.586	2524.38	4223.61	189.673	361.697	281.602	202.696	261.523	293.244	8514.01
MAR_ORF288	hypothetical protein	0	0	18.9733	43.5664	78.2858	56.5965	83.6779	89.7603	49.342	420.202
MAR_ORF289	putative nuclease	0	7.21905	86.5952	527.228	696.042	547.931	545.661	476.645	628.715	3516.04
MAR_ORF290	hypothetical protein	20.1541	16.9916	62.3816	877.528	1019.38	1323.46	967.731	954.221	976.385	6218.23
MAR_ORF291	SWIB/MDM2 domain-containing protein	651.436	28.0213	20074.5	10549.1	7955.13	5788.04	4293.19	4721.15	5354.18	59414.8
MAR_ORF292	hypothetical protein	301.041	10069	9773.65	3157.82	1168.08	806.617	1113.82	1578.67	762.21	28730.9
MAR_ORF293	AP endonuclease family 2 protein	20.2078	332.221	284.356	411.049	349.826	315.582	241.08	336.318	283.333	2573.97
MAR_ORF294	hypothetical protein	11171.3	7886.46	537.714	65.701	55.1969	167.599	149.739	191.608	112.744	20338.1
MAR_ORF295	HNH-family endonuclease	52.1492	1033.21	1335.3	410.93	353.26	432.032	392.221	514.83	590.477	5114.4
MAR_ORF296	membrane protein	288.683	225.131	517.547	8876.98	15736.7	18445.6	13093.6	7776.8	16295.6	81256.7
MAR_ORF297	hypothetical protein	0	54.1429	97.0916	329.517	357.688	273.966	239.837	190.589	281.974	1824.81
MAR_ORF298	hypothetical protein	264.86	818.766	1194.23	10429.9	8439.23	7689.65	10039.8	8411.03	9674.86	56962.4
MAR_ORF299	hypothetical protein	0	99.5666	177.944	678.109	325.925	134.95	326.704	272.121	174.299	2189.62
MAR_ORF300	hypothetical protein	1349.24	31.1652	68.9146	36586.7	49037.7	50251.9	55730.5	67098.6	58014.5	318169
MAR_ORF301	Vsr/MutH/archaeal HJR family nuclease	13.318	289.688	279.713	68.3358	58.1394	71.0192	55.2641	68.358	56.0192	959.855
MAR_ORF302	hypothetical protein	2295.95	842.786	54.3523	42.5468	9.70839	24.5653	30.5851	53.0794	28.5554	3382.13
MAR_ORF303	hypothetical protein	588.404	7666.63	6936.93	509.727	523.397	706.325	475.643	286.992	575.656	18269.7
MAR_ORF304	eukaryotic translation initiation factor 5	70.2589	1074.68	765.906	58.858	105.764	91.7538	107.098	57.3773	38.8854	2370.58
MAR_ORF305	hypothetical protein	378.896	31.9443	27.7389	35828	39222.3	43382.9	28499.2	15090.3	25099.2	187560
MAR_ORF306	early transcription factor large subunit	68.0413	59.6144	145.418	2557.32	2100.72	2216.65	3298.75	3503.22	2463.03	16412.8
MAR_ORF307	hypothetical protein	81.5562	194.817	145.796	1270.36	1652.28	1900.12	1250.96	855.844	1242.55	8594.28
MAR_ORF308	hypothetical protein	225.173	80.3171	17.2516	57.1343	13.037	6.59754	20.5357	17.2051	9.58644	446.837
MAR_ORF309	hypothetical protein	435.99	210.045	10587.3	9709.35	5047.37	4017.27	2356.86	3737.3	3117.78	39219.2
MAR_ORF310	disulfide oxidoreductase	182.326	1402.67	1130.32	2004.71	2324.36	3099.11	2431.86	1339.35	1765.92	15680.6
MAR_ORF311	hypothetical protein	1326.14	1535.1	1350.39	5693.59	4586.71	3479.74	3356.66	4594.42	5970.72	31893.5
MAR_ORF312	hypothetical protein	88.7653	13.8587	11.9223	3125.59	3174.76	2441.88	3177.66	5408.77	2272.62	19715.8
MAR_ORF313	thioredoxin	162.095	81.9961	1755.61	10913.4	8277.96	5538.23	4127.04	5579.16	6338.2	42773.7
MAR_ORF314	3-domain mRNA capping enzyme	5700.08	2845.38	221.943	456.571	325.527	256.258	390.053	467.594	346.437	11009.8
MAR_ORF315	DNA repair exonuclease SbcCD D subunit	35.9783	841.737	885.746	454.927	206.483	157.597	173.289	238.129	199.125	3193.01
MAR_ORF316	ankyrin repeat-containing protein	7391.76	3137.19	167.239	605.24	496.187	528.899	658.897	915.484	691.738	14592.6
MAR_ORF317	hypothetical protein	1353.92	170.37	40.2537	36305.7	39575.9	39270.7	54229.6	35972.5	68786.4	275705
MAR_ORF318	hypothetical protein	796.928	4667.17	10131.4	1215.26	1531.69	1680.36	2140.64	2609.9	2164.64	26938
MAR_ORF319	XRN1 5'-3' exonuclease	5901.83	5662.79	897.872	212.686	232.329	315.096	366.877	396.337	452.72	14438.5
MAR_ORF320	hypothetical protein	27.5561	232.322	22.5195	60.597	0	20.9922	57.1732	32.3991	10.1674	463.727
MAR_ORF321	zinc finger protein	52.5203	113.861	845.005	112.744	64.9429	54.299	51.1486	73.3101	62.9802	1430.81
MAR_ORF322	zinc finger protein	24.4449	61.8277	540.003	770.494	266.785	279.331	405.746	623.386	243.527	3215.54
MAR_ORF323	truncated XRN1	0	13.1729	34.3162	11.453	47.0407	11.9028	9.26223	110.224	69.1805	306.552
MAR_ORF324	hypothetical protein	26.5892	195.349	779.153	211.608	82.9106	60.7668	84.4395	145.686	97.4061	1683.91
MAR_ORF325	hypothetical protein	29.6013	104.817	279.405	256.038	187.152	171.381	131.607	239.306	172.568	1571.88
MAR_ORF326	P-loop ATPase/GTPase	2344.87	2893.07	528.366	68.124	37.6658	54.4608	36.0222	35.071	38.2478	6035.89
MAR_ORF327	restriction endonuclease	296.758	4548.15	5089.99	691.427	584.993	637.839	781.158	783.337	584.628	13998.3
MAR_ORF328	glycosyltransferase	31.1422	35.0074	94.1125	494.599	429.729	336.09	486.14	679.28	232.685	2818.79
MAR_ORF329	DNA polymerase B family	39.313	796.607	1011.67	326.924	342.833	374.874	338.722	402.921	506.689	4140.56
MAR_ORF330	ankyrin repeat-containing protein	1572.66	1034.51	142.352	773.942	1045.28	1200.46	1264.95	1761	990.9	9786.06
MAR_ORF331	ankyrin repeat-containing protein	323.448	13455.6	22095.1	1320.94	1078.13	1161.61	1068.26	899.594	571.143	41973.8
MAR_ORF332	thioredoxin	81.7227	18.7908	90.6922	2227.33	3679.43	4652.23	3965.89	4624.76	3618.41	22959.3
MAR_ORF333	hypothetical protein	63.591	80.4192	1738.77	1328.47	781.763	258.365	216.756	228.169	236.588	4932.89
MAR_ORF334	inactivated thioredoxin/glutaredoxin	451.665	253.862	7902.57	5311.93	3172.91	2049.17	2005.12	3810.51	2238.69	27196.4
MAR_ORF335	hypothetical protein	11.9337	0	29.2577	96.2235	98.8039	90.911	53.0573	79.8322	70.4515	530.471
MAR_ORF336	hypothetical protein	483.42	572.794	635.303	239.428	177.011	199.064	255.59	391.457	197.651	3151.72
MAR_ORF337	hypothetical protein	170.931	2180.86	2655.83	175.412	94.3466	295.153	179.012	276.279	237.559	6265.38
MAR_ORF338	membrane protein	38.08	6.42096	27.23	714.577	773.866	1067.54	668.184	425.804	665.993	4387.7
MAR_ORF339	hypothetical protein	81.4158	179.522	2353.99	8722.29	5948.8	4122.1	4106.08	3177.2	4901.17	33592.6
MAR_ORF340	transcription factor A2-like protein	17.4707	18.4117	52.4252	284.94	200.533	183.001	130.752	200.808	135.37	1223.71
MAR_ORF341	hypothetical protein	205.82	4574.74	15655.2	1714.42	2436.39	2052.57	1946.61	2591.38	3230.99	34408.1
MAR_ORF342	major capsid protein	608.771	48.1169	26.3974	61325.1	45875.2	40047.6	66724.9	23909.4	30870.6	269436
MAR_ORF343	hypothetical protein	39.0615	1686.13	1707.03	778.806	552.728	499.917	470.058	486.822	634.155	6854.71
MAR_ORF344	zinc-ribbon-containing protein	91.5851	859.32	697.905	158.088	164.551	216.06	209.285	266.508	178.227	2841.53
MAR_ORF345	hypothetical protein	6828.11	5137.99	268.901	70.1649	84.0542	24.3067	85.115	56.2722	117.728	12672.6
MAR_ORF346	hypothetical protein	88.2865	1758.49	1143.69	169.877	132.901	109.292	140.653	179.866	91.618	3814.67
MAR_ORF347	zinc-ribbon-containing protein	6.98427	29.4417	29.9655	511.956	226.044	287.312	318.8	427.012	180.39	2017.91
MAR_ORF348	hypothetical protein	6073.17	4280.54	2818.86	436.442	488.887	552.544	718.749	1121.4	625.116	17115.7
MAR_ORF349	restriction endonuclease	174.205	2761.16	4161.86	439.27	563.812	554.724	490.526	497.082	416.514	10059.2
MAR_ORF350	hypothetical protein	1409.66	2761.64	1006.76	95.5651	110.394	111.732	99.0212	149.322	76.6658	5820.75
MAR_ORF351	hypothetical protein	8.28189	6.98236	16.0744	42.4951	81.0359	50.473	83.4613	35.592	53.4763	377.872
MAR_ORF352	divergent serine/threonine protein kinase	487.424	237.576	18.283	5.58264	0	0	2.25738	1.54389	1.40505	754.072
MAR_ORF353	divergent serine/threonine protein kinase	2567.22	6049.86	7667.23	1428.36	814.811	842.364	813.635	874.674	526.398	21584.5
MAR_ORF354	hypothetical protein	5402.5	18384.3	29999.1	513.906	527.687	714.733	314.758	420.094	372.806	56649.8
MAR_ORF355	MORN repeat-containing protein	0	89.1469	72.0101	19.3769	19.8966	46.9883	39.176	51.4437	43.8914	381.93
MAR_ORF356	hypothetical protein	359.143	714.583	812.998	173.75	254.098	399.448	347.026	444.979	475.725	3981.75
MAR_ORF357	hypothetical protein	193.479	285.46	345.055	11.8186	97.0839	49.1306	33.4524	69.2909	92.21	1176.98
MAR_ORF358	hypothetical protein	230.946	1630.68	1467.86	1491.84	1086.42	1044.61	1300.59	1924.16	1688.28	11865.4
MAR_ORF359	hypothetical protein	20.7614	52.5112	748.659	776.139	703.193	743.353	510.755	607.733	697.096	4860.2
MAR_ORF360	divergent serine/threonine protein kinase	137.088	1207.14	833.626	72.5743	68.7881	179.857	121.898	162.726	167.201	2950.9
MAR_ORF361	MORN repeat-containing protein	30160.2	3075.78	263.75	23.806	48.8887	24.7408	41.7131	32.4789	27.9605	33699.3
MAR_ORF362	hypothetical protein	109.372	632.299	1127.65	137.436	341.045	309.472	199.138	217.28	409.318	3483.01
MAR_ORF363	calcineurin-like phosphoesterase	106.029	3034.05	3474.89	969.219	952.961	1069.05	1177.58	1438.05	1016.01	13237.8
MAR_ORF364	hypothetical protein	61.8606	104.308	388.634	759.523	221.163	117.813	192.522	367.426	122.684	2335.93
MAR_ORF365	flap-specific endonuclease	45.9268	2647.06	1607.29	119.358	128.843	117.683	87.8636	189.587	96.2826	5039.9
MAR_ORF366	MORN repeat-containing protein	25.9815	116.825	54.4088	12.6965	0	0	7.70089	8.77809	4.79322	231.184
MAR_ORF367	putative nuclease	58.2918	40.9542	1142.55	1573.84	1188.27	999.146	695.424	1281.12	1173.98	8153.58
MAR_ORF368	hypothetical protein	30340.1	15383.7	1098.08	97.0055	42.6887	91.2134	63.507	108.713	66.268	47291.3
MAR_ORF369	hypothetical protein	974.754	3642.45	8260.48	1954.52	946.669	709.03	710.175	1289.87	690.31	19178.3
MAR_ORF370	hypothetical protein	1316.99	317.24	948.15	17200.5	28825.2	27160.2	39831.7	89992.2	36076.7	241669
MAR_ORF371	Csr/MutH/archaeal HJR family nuclease	100.322	1758.07	1719.33	567.291	337.097	382.127	621.259	914.872	635.885	7036.25
MAR_ORF372	hypothetical protein	45.4676	89.444	629.35	2544.06	3171.25	3475.25	4200.19	2560.48	3629.27	20344.8
MAR_ORF373	hypothetical protein	17.2226	14.5201	43.9835	25.2487	38.8887	39.3603	61.257	80.2996	88.9651	409.746
MAR_ORF374	hypothetical protein	13325	9435.07	1852.91	151.088	173.392	249.387	280.312	263.975	284.078	26015.2
MAR_ORF375	hypothetical protein	1374.85	10459.5	28671.3	515.796	871.848	1006.12	965.819	1696.37	1973.21	47534.8
MAR_ORF376	hypothetical protein	875.89	5019.82	2357.51	72.1393	140.74	314.882	140.016	88.9779	143.433	9153.41
MAR_ORF377	hypothetical protein	145.496	981.329	965.468	293.289	328.532	267.86	319.843	724.579	225.92	4252.32
MAR_ORF378	hypothetical protein	2758.37	1635.55	211.332	3988.29	7232.27	9825.38	8669.91	13569.3	10496.4	58386.7
MAR_ORF379	hypothetical protein	95.5775	0	25.8036	3322.82	6525.83	7229.06	6604.72	4214.35	6372.97	34391.1
MAR_ORF380	hypothetical protein	6.18606	31.2924	43.9188	453.447	568.04	692.741	718.749	1081.96	855.932	4452.27
MAR_ORF381	hypothetical protein	42.394	17.8709	3.78934	85.4573	87.7489	80.7391	53.4036	174.457	50.8372	596.697
MAR_ORF382	hypothetical protein	27.9628	18.8601	45.4182	979.763	875.546	958.591	1284.66	808.329	837.782	5836.92
MAR_ORF383	RNAP subunit Rpb5	5492.04	6797.22	480.426	108.804	105.841	136.882	106.516	113.391	164.304	13505.4
MAR_ORF384	hypothetical protein	898.777	133.72	23.4033	38560.1	35601.6	42222.3	50019.9	54509.6	34820.5	256790
MAR_ORF385	F-box containing protein	1953.74	1883.35	749.895	726.589	427.1	465.111	593.99	1058.28	580.411	8438.47
MAR_ORF386	hypothetical protein	291.821	269.84	50.0045	6.90028	14.1706	14.3425	16.7411	69.8431	74.677	808.34
MAR_ORF387	HNH endonuclease	341.067	2454.29	3216.54	2313.44	3272.16	4113.27	4162.57	3855.56	4778.98	28507.9
MAR_ORF388	hypothetical protein	0	79.8607	32.4849	188.464	122.222	61.8519	60.1632	65.8357	34.9506	645.833
MAR_ORF389	hypothetical protein	27733	43921	21364.2	514.019	408.622	534.204	395.58	743.779	438.186	96052.6
MAR_ORF390	hypothetical protein	165.767	2575.51	1732.07	711.699	784.256	2110.7	1165.16	750.801	1629.57	11625.5
MAR_ORF391	multiple zinc ribbon protein	1775.58	9869.32	27204.6	51233.6	49629.2	43289.1	39410.9	45095.4	50282	317790
MAR_ORF392	hypothetical protein	360.854	756.232	6051.74	5139.06	5602.8	5694.3	6087.37	13252.4	10100	53044.8
MAR_ORF393	hypothetical protein	831.925	3298.6	3424.59	736.604	861.752	1010.25	957.03	1274.68	940.626	13336.1
MAR_ORF394	hypothetical protein	21909.5	19222.6	1293.58	789.355	1110.72	1326.74	1253.08	1208.99	1711.96	49826.6
MAR_ORF395	galactose binding lectin domain-containing protein	22.5087	18.9768	29.5081	753.462	1377.92	1600.39	1100.81	1096.91	1128.11	7128.6
MAR_ORF396	hypothetical protein	513.868	3652.34	12336.2	1826.14	2531.16	3126.75	2460.1	2366.09	2391.64	31204.3
MAR_ORF397	hypothetical protein	296.528	18.5184	231.111	7881.27	11134.6	11830.1	12402.3	10389.8	9117.54	63301.8
MAR_ORF398	uracil-DNA glycosylase D4	2099.37	5202.58	2448.48	1009.45	1180.17	1171.67	976.079	997.711	950.655	16036.2
MAR_ORF399	hypothetical protein	156.202	1847.25	2636.28	167.106	165.232	247.637	176.434	217.545	302.97	5916.66
MAR_ORF400	cell division cycle 123 protein	5.61328	104.115	37.2719	28.8023	38.0245	34.2095	34.9392	46.4263	32.1027	361.504
MAR_ORF401	hypothetical protein	228.056	74.1834	158.949	5174.32	6252.42	7987.59	9266.46	11375.3	10138.6	50655.9
MAR_ORF403	zinc finger protein	2489.89	2892.37	1024.25	321.191	314.284	327.913	235.305	295.216	305.758	8206.18
MAR_ORF404	AAA family ATPase	266.439	91.8946	790.634	5854.02	9543.9	11108.1	11433.5	11852.3	15325.6	66266.4
MAR_ORF405	hypothetical protein	12.3218	779.129	346.776	90.3207	37.0971	18.7735	43.8262	80.9297	31.8249	1441
MAR_ORF406	hypothetical protein	48.8899	178.613	1084.58	2890.84	895.416	595.907	608.618	780.306	487.053	7570.23
MAR_ORF407	ubiquitin-like protein	420.996	745.367	2474.28	4371.77	4267.2	5644.56	4700.15	4953.85	2216.12	29794.3
MAR_ORF408	ATP-dependent exoDNAse alpha subunit	544.966	4553.76	4726.18	371.103	257.272	287.414	272.398	264.221	196.913	11474.2
MAR_ORF409	restriction endonuclease	156.681	2530.14	2928.69	625.044	653.145	709.268	543.885	638.41	694.842	9480.1
MAR_ORF410	hypothetical protein	41.7134	23.4454	70.309	2058.81	1245.39	1207.53	2246.09	2572.3	641.295	10106.9
MAR_ORF411	hypothetical protein	522.818	11257.3	12683.7	2966.82	2427.38	2492.62	2188.63	1770.28	1970.24	38279.7
MAR_ORF412	hypothetical protein	54414.4	40208.6	5914.44	197.103	101.194	195.532	130.418	201.684	191.664	101555
MAR_ORF413	histone H3	520.373	43.872	66.4471	16092	35578.2	41291.9	29850.8	22199.6	25555.6	171199
MAR_ORF414	histone H2B/H2A fusion protein	177.943	36.2122	34.7879	11518.7	10451.4	12840.5	11992.5	11247	11506.8	69805.8
MAR_ORF415	hypothetical protein	165.064	88.5584	264.04	1979.9	3794.92	5515.64	4596.7	4638.61	5138.08	26181.5
MAR_ORF416	peptidoglycan peptidase	14.7144	0	9.01874	199.539	127.364	140.118	215.886	229.381	65.1506	1001.17
MAR_ORF417	hypothetical protein	78.6389	204.926	533.843	3028.9	2980.98	2968.11	4464.64	3637.81	2640.42	20538.3
MAR_ORF418	hypothetical protein	249.822	126.373	65.5015	24.4164	150.427	38.0627	197.459	340.995	110.613	1303.67
MAR_ORF419	hypothetical protein	11.2266	227.159	152.528	436.149	963.288	1128.91	1048.18	1425.11	932.015	6324.56
MAR_ORF420	hypothetical protein	4008.97	1519.19	130.564	133.109	105.137	63.8471	120.068	69.6584	126.273	6276.82
MAR_ORF421	hypothetical protein	209.991	61.5794	1985.64	17949.1	17337.8	21449.9	21451.5	9316.94	15270.4	105033
MAR_ORF422	hypothetical protein	0	0	8.10114	12.918	0	0	0	1.42899	9.75365	32.2017
MAR_ORF423	putative P-loop kinase	11.8405	9.98259	12.0954	199.623	338.656	604.345	582.58	485.812	557.025	2801.96
MAR_ORF424	serine/threonine protein kinase	35.5771	857.847	1059.4	985.768	1301.4	1376.81	1353.98	1364.81	1531.92	9867.51
MAR_ORF425	hypothetical protein	75.7793	212.962	176.755	1147.98	1597.03	1982.01	2231.12	2222.32	1290.84	10936.8
MAR_ORF426	WD repeat protein	29.2396	135.584	324.08	396.511	542.858	597.703	424.663	534.447	472.001	3457.09
MAR_ORF427	serine/threonine protein kinase	61.1123	77.2846	569.345	1962.07	2851.84	3263.52	3668.01	4026.98	2009.09	18489.3
MAR_ORF428	Vsr/MutH/archaeal HJR family endonuclease	43.614	36.7704	317.997	631.4	558.058	855.544	869.351	1072.44	720.133	5105.31
MAR_ORF429	bifunctional dihydrofolate reductase-thymidylate synthase	20.4349	25.8426	904.751	586.679	328.122	230.914	154.45	133.94	218.657	2603.79
MAR_ORF430	hypothetical protein	131.79	1936.5	3122.88	262.21	155.877	172.11	108.817	178.997	152.827	6222.01
MAR_ORF431	hypothetical protein	604.253	400.87	4158.43	2802.77	1826.67	1539.43	1485.65	1804.04	2430.55	17052.7
MAR_ORF432	serine/threonine protein kinase	4123.66	4200.68	222.556	27.7736	23.7653	43.2963	29.9479	45.829	19.8053	8737.3
MAR_ORF433	hypothetical protein	15.3089	51.6271	71.1555	841.625	875.717	699.739	1188.84	687.706	403.873	4835.59
MAR_ORF434	MORN repeat-containing protein	0	39.577	91.4544	172.049	166.568	214.566	164.978	297.989	225.168	1372.35
MAR_ORF435	hypothetical protein	8.91521	120.261	106.554	973.71	771.674	835.365	1128.33	885.555	465.459	5295.82
MAR_ORF436	hypothetical protein	50.5195	42.5924	135.899	592.504	456.294	461.828	858.506	1096.48	599.596	4294.22
MAR_ORF437	hypothetical protein	8050.18	4249.98	1281.77	474.969	777.023	602.384	947.265	1134.54	692.933	18211
MAR_ORF438	hypothetical protein	23409.3	5768.23	211.442	165.055	169.481	131.951	279.799	360.955	134.21	30630.4
MAR_ORF439	hypothetical protein	3512.59	3848.35	316.019	65.3497	80.5225	81.499	26.4246	12.2893	23.0263	7966.07
MAR_ORF440	hypothetical protein	215.014	371.394	177.322	23.0646	19.7359	23.9703	6.21755	19.7735	16.4473	872.939
MAR_ORF441	hypothetical protein	64.493	869.972	1032.15	370.315	469.239	417.61	452.404	495.059	509.634	4680.87
MAR_ORF442	hypothetical protein	65.895	430.554	630.226	386.415	347.181	376.49	185.547	203.041	234.017	2859.36
MAR_ORF443	hypothetical protein	138.929	2481.01	5572.29	444.378	285.184	125.078	153.483	71.1757	102.522	9374.05
MAR_ORF444	hypothetical protein	123.721	3846.35	3357.1	283.404	314.284	388.783	352.957	310.995	436.525	9414.13
MAR_ORF445	ankyrin repeat-containing protein	2787.74	516.405	8.82404	5.75619	5.91055	17.9467	11.6378	7.32266	5.79491	3367.33
MAR_ORF446	serine/threonine protein kinase	628.998	823.229	280.882	13.1733	22.5442	9.12703	7.10227	28.416	18.7877	1832.26
MAR_ORF447	hypothetical protein	28741	24951.4	1245.61	504.975	352.591	440.835	392.045	186.574	127.093	56942.1
MAR_ORF448	hypothetical protein	24.8457	282.786	396.572	983.459	1813.96	2091.47	1988.34	1694.32	1996.19	11271.9
MAR_ORF449	hypothetical protein	48.1138	101.41	114.273	176.34	108.642	109.959	171.131	38.0384	133.145	1001.05
MAR_ORF450	hypothetical protein	212.714	4617.91	4311.92	779.61	1621.05	1397.64	1331.89	2107.51	1819.88	18200.1
MAR_ORF451	glycosyltransferase	18.3707	15.4881	36.1251	737.263	622.22	675.248	807.232	972.533	452.451	4336.93
MAR_ORF452	hypothetical protein	79.7677	995.317	1205.57	58.4708	60.0387	54.6901	56.7434	43.9829	42.6765	2597.26
MAR_ORF453	hypothetical protein	104.764	88.3252	3524.87	665.543	499.401	553.342	401.605	421.632	392.993	6652.47
MAR_ORF454	hypothetical protein	399.946	4294.73	12908.3	1326.96	491.15	481.07	499.131	597.398	392.223	21390.9
MAR_ORF455	hypothetical protein	53.1784	201.753	903.127	1325.34	500.323	243.067	212.788	238.24	156.971	3834.79
MAR_ORF456	hypothetical protein	17.0931	4.80365	170.537	238.06	124.366	169.279	162.124	345.349	135.598	1367.21
MAR_ORF457	hypothetical protein	84.7222	3587.29	3144.52	179.407	247.986	229.48	178.571	246.55	312.601	8211.12
MAR_ORF458	hypothetical protein	91.3003	1370.14	3414.47	2436.05	1140.74	862.449	887.612	1682.01	1809.01	13693.8
MAR_ORF459	D5-like helicase-primase	3.74219	31.5499	102.546	108.351	92.9489	85.5236	59.3412	71.536	73.8708	629.41
