# Supplementary material for: Analysis of a Marseillevirus Transcriptome Reveals Temporal Gene Expression Profile and Host Transcriptional Shift
Source: Front Microbiol. 2020 Apr 14;11:651. doi: 10.3389/fmicb.2020.00651 (PMC7192143; doi:10.3389/fmicb.2020.00651)
Supplement: TABLE S9 — Expression data in TMM for all Acanthamoeba castellanii Neff genes at each evaluated time of infection (0 h corresponds to 30 min of infection due to virus adsorption period). [file Table_9.xls]

## Sheet: Sheet1
Gene	Gene function	Time of infection (Trimmed Mean of M values (TMM) normalised expression data)
		0h	1h	2h	4h	5h	6h	8h	10h	12h
ACA1_000220	Endonuclease/Exonuclease/phosphatase family protein	5.67324	5.94363	5.1739	4.4895	4.4895	4.4895	4.4895	4.4895	4.4895
ACA1_000570	K+ channel tetramerisation subfamily protein	5.89313	6.15621	5.6362	4.4895	4.4895	4.4895	4.4895	4.4895	4.4895
ACA1_000830	glyoxalase family protein	4.78159	4.4895	4.4895	4.4895	4.4895	4.4895	4.4895	4.4895	4.4895
ACA1_001250	hypothetical protein	6.59093	6.34145	7.82657	4.4895	4.4895	4.4895	4.4895	6.26343	4.4895
ACA1_001260	TBC domaincontaining protein	7.00365	5.69423	5.98576	4.4895	4.4895	4.4895	4.4895	4.4895	4.4895
ACA1_001280	hypothetical protein	5.09701	5.39251	4.4895	4.4895	4.4895	4.4895	4.4895	4.4895	4.4895
ACA1_001300	fucose1-phosphate guanylyltra	4.78159	5.01053	4.4895	4.4895	4.4895	4.4895	4.4895	4.4895	4.4895
ACA1_001510	hypothetical protein	4.86714	4.4895	4.4895	4.4895	4.4895	4.4895	4.4895	4.4895	4.4895
ACA1_001550	Dgalactarate dehydratase/Altronate hydrolase-like protein	4.59358	4.4895	4.4895	4.4895	4.4895	4.4895	4.4895	4.4895	4.4895
ACA1_002200	cytochrome b-like heme/steroid binding domain containing protein	5.29523	5.01053	4.4895	4.4895	4.4895	4.4895	4.4895	4.4895	4.4895
ACA1_002320	Fbox domain containing protein	6.01059	5.69423	5.1739	4.4895	4.4895	4.4895	4.4895	4.4895	4.4895
ACA1_002440	Fbox domain containing protein	4.86714	4.4895	4.4895	4.4895	4.4895	4.4895	4.4895	4.4895	4.4895
ACA1_002460	Fbox domain containing protein	5.02438	4.4895	4.4895	4.4895	4.4895	4.4895	4.4895	4.4895	4.4895
ACA1_002760	hypothetical protein	5.02438	5.01053	4.4895	4.4895	4.4895	4.4895	4.4895	4.4895	4.4895
ACA1_003650	EXS family protein	5.29523	5.01053	5.1739	4.4895	4.4895	4.4895	4.4895	4.4895	4.4895
ACA1_003870	hypothetical protein	5.16615	4.4895	4.4895	4.4895	4.4895	4.4895	4.4895	4.4895	4.4895
ACA1_004520	hypothetical protein	4.59358	4.4895	4.4895	4.4895	4.4895	4.4895	4.4895	4.4895	4.4895
ACA1_004630	hypothetical protein	5.41371	5.01053	4.4895	4.4895	4.4895	4.4895	4.4895	4.4895	4.4895
ACA1_004850	Actinrelated protein 5, putative	5.16615	5.01053	5.1739	4.4895	4.4895	4.4895	4.4895	4.4895	4.4895
ACA1_005220	DNA replication licensing fact	5.16615	4.4895	5.1739	4.4895	4.4895	4.4895	4.4895	4.4895	4.4895
ACA1_005830	Ser/Thr phosphatase, putative	5.41371	5.01053	5.6362	4.4895	4.4895	4.4895	4.4895	4.4895	4.4895
ACA1_006070	hypothetical protein	5.09701	5.39251	5.6362	4.4895	4.4895	4.4895	4.4895	4.4895	4.4895
ACA1_006100	asparagine-linked glycosylase, putati	4.78159	4.4895	4.4895	4.4895	4.4895	4.4895	4.4895	4.4895	4.4895
ACA1_006120	Ankyrin repeat containing protein	5.52318	5.39251	5.98576	4.4895	4.4895	4.4895	4.4895	4.4895	4.4895
ACA1_006140	BTB/POZ domain containing protein	4.78159	4.4895	5.1739	4.4895	4.4895	4.4895	4.4895	4.4895	4.4895
ACA1_006190	hypothetical protein	4.59358	4.4895	4.4895	4.4895	4.4895	4.4895	4.4895	4.4895	4.4895
ACA1_006230	NOL1/NOP2/sun domain containing protein	4.86714	5.01053	4.4895	4.4895	4.4895	4.4895	4.4895	4.4895	4.4895
ACA1_006260	hypothetical protein	5.76526	5.01053	5.1739	4.4895	4.4895	4.4895	4.4895	4.4895	4.4895
ACA1_006270	hypothetical protein	5.02438	4.4895	5.1739	4.4895	4.4895	4.4895	4.4895	4.4895	4.4895
ACA1_006680	arginine deiminase	4.78159	4.4895	4.4895	4.4895	4.4895	4.4895	4.4895	4.4895	4.4895
ACA1_006790	hypothetical protein	4.78159	4.4895	4.4895	4.4895	4.4895	4.4895	4.4895	4.4895	4.4895
ACA1_007510	5'3' exoribonuclease 2, putative	4.69064	4.4895	4.4895	4.4895	4.4895	4.4895	4.4895	4.4895	4.4895
ACA1_007740	RasGEF domain containing protein	6.22021	6.15621	6.70431	4.4895	4.4895	4.4895	4.4895	4.4895	4.4895
ACA1_007770	GTPase cRac1B, putative	4.78159	4.4895	4.4895	4.4895	4.4895	4.4895	4.4895	4.4895	4.4895
ACA1_007790	peptidase, S54 (rhomboid) subfamily protein	6.22021	5.69423	5.1739	4.4895	4.4895	4.4895	4.4895	4.4895	4.4895
ACA1_008410	hypothetical protein	4.59358	4.4895	4.4895	4.4895	4.4895	4.4895	4.4895	4.4895	4.4895
ACA1_008610	hypothetical protein	4.69064	5.01053	4.4895	4.4895	4.4895	4.4895	4.4895	4.4895	4.4895
ACA1_008730	hypothetical protein	4.59358	4.4895	4.4895	4.4895	4.4895	4.4895	4.4895	4.4895	4.4895
ACA1_009170	serine/threonine protein kinase	11.1361	11.0653	10.6477	11.8205	11.3638	10.8576	11.3511	9.27705	9.40272
ACA1_009940	acylCoA oxidase	4.9479	5.69423	5.1739	4.4895	4.4895	4.4895	4.4895	4.4895	4.4895
ACA1_010050	hypothetical protein	4.78159	5.01053	5.1739	4.4895	4.4895	4.4895	4.4895	4.4895	4.4895
ACA1_010150	SnoaL family polyketide cyclase	4.59358	4.4895	4.4895	4.4895	4.4895	4.4895	4.4895	4.4895	4.4895
ACA1_010190	hypothetical protein	6.15366	6.15621	6.70431	4.4895	4.4895	4.4895	4.4895	4.4895	4.4895
ACA1_010390	hypothetical protein	4.59358	4.4895	4.4895	4.4895	4.4895	4.4895	4.4895	4.4895	4.4895
ACA1_010610	Fbox domain and Ankyrin repeat containing protein	4.78159	5.01053	4.4895	4.4895	4.4895	4.4895	4.4895	4.4895	4.4895
ACA1_010940	hypothetical protein	5.09701	5.39251	4.4895	4.4895	4.4895	4.4895	4.4895	4.4895	4.4895
ACA1_012030	hypothetical protein	5.97249	5.69423	5.98576	4.4895	4.4895	4.4895	4.4895	4.4895	4.4895
ACA1_012280	cobalamin synthesis protein/P47K	5.67324	5.01053	5.6362	4.4895	4.4895	4.4895	4.4895	4.4895	4.4895
ACA1_013240	hypothetical protein	4.59358	4.4895	4.4895	4.4895	4.4895	4.4895	4.4895	4.4895	4.4895
ACA1_013350	hypothetical protein	5.35569	4.4895	4.4895	4.4895	4.4895	4.4895	4.4895	4.4895	4.4895
ACA1_013360	hypothetical protein	5.97249	5.69423	5.6362	4.4895	4.4895	4.4895	4.4895	4.4895	4.4895
ACA1_014350	hypothetical protein	5.02438	5.01053	4.4895	4.4895	4.4895	4.4895	4.4895	4.4895	4.4895
ACA1_014520	hypothetical protein	4.9479	5.39251	4.4895	4.4895	4.4895	4.4895	4.4895	4.4895	4.4895
ACA1_014760	hypothetical protein	4.86714	4.4895	4.4895	4.4895	4.4895	4.4895	4.4895	4.4895	4.4895
ACA1_014980	hypothetical protein	6.68817	6.15621	5.6362	4.4895	4.4895	4.4895	4.4895	4.4895	4.4895
ACA1_015470	hypothetical protein	5.76526	5.69423	5.6362	4.4895	4.4895	4.4895	4.4895	4.4895	4.4895
ACA1_015520	hypothetical protein	5.57496	4.4895	4.4895	4.4895	4.4895	4.4895	4.4895	4.4895	4.4895
ACA1_015550	hypothetical protein	5.76526	5.01053	4.4895	4.4895	4.4895	4.4895	4.4895	4.4895	4.4895
ACA1_015690	hypothetical protein	4.9479	4.4895	5.1739	4.4895	4.4895	4.4895	4.4895	4.4895	4.4895
ACA1_016130	hypothetical protein	4.59358	4.4895	4.4895	4.4895	4.4895	4.4895	4.4895	4.4895	4.4895
ACA1_017430	integrator complex subunit 9, putative	5.23214	5.39251	5.1739	4.4895	4.4895	4.4895	4.4895	4.4895	4.4895
ACA1_017540	hypothetical protein	5.16615	4.4895	5.1739	4.4895	4.4895	4.4895	4.4895	4.4895	4.4895
ACA1_017740	Exonuclease ii, putative	10.3381	9.78516	10.3185	10.8295	11.6833	10.8576	9.79076	10.7377	10.5458
ACA1_017770	ABC2 type transporter superfamily protein	6.1192	5.39251	5.6362	4.4895	4.4895	4.4895	4.4895	4.4895	4.4895
ACA1_017890	hypothetical protein	5.80916	5.94363	5.1739	4.4895	4.4895	4.4895	4.4895	4.4895	4.4895
ACA1_018000	betalactamase	6.25236	5.39251	5.6362	4.4895	4.4895	4.4895	4.4895	4.4895	4.4895
ACA1_018790	fibronectin type III domain containing protein	5.02438	5.01053	5.6362	4.4895	4.4895	4.4895	4.4895	4.4895	4.4895
ACA1_018930	Fbox domain containing protein	4.9479	4.4895	5.1739	4.4895	4.4895	4.4895	4.4895	4.4895	4.4895
ACA1_018940	hypothetical protein	5.80916	5.01053	5.1739	4.4895	4.4895	4.4895	4.4895	4.4895	4.4895
ACA1_019160	hypothetical protein	4.69064	4.4895	4.4895	4.4895	4.4895	4.4895	4.4895	4.4895	4.4895
ACA1_019220	amidohydrolase family protein	6.22021	5.69423	5.1739	4.4895	4.4895	4.4895	4.4895	4.4895	4.4895
ACA1_019380	kinesin motor domain containing protein	6.92603	6.34145	6.70431	4.4895	4.4895	4.4895	4.4895	4.4895	4.4895
ACA1_019600	cytochrome p450 superfam	4.69064	5.01053	5.1739	4.4895	4.4895	4.4895	4.4895	4.4895	4.4895
ACA1_020100	Sec1 family protein	6.64037	5.69423	5.1739	4.4895	4.4895	4.4895	4.4895	4.4895	4.4895
ACA1_020900	Fbox domain containing protein	4.9479	5.01053	4.4895	4.4895	4.4895	4.4895	4.4895	4.4895	4.4895
ACA1_020930	dual specificity ph	4.78159	5.01053	4.4895	4.4895	4.4895	4.4895	4.4895	4.4895	4.4895
ACA1_021160	hypothetical protein	4.69064	4.4895	4.4895	4.4895	4.4895	4.4895	4.4895	4.4895	4.4895
ACA1_022040	hypothetical protein	5.16615	4.4895	5.1739	4.4895	4.4895	4.4895	4.4895	4.4895	4.4895
ACA1_022730	cathepsin Blike cysteine proteinase	4.59358	4.4895	4.4895	4.4895	4.4895	4.4895	4.4895	4.4895	4.4895
ACA1_023130	hypothetical protein	4.59358	4.4895	4.4895	4.4895	4.4895	4.4895	4.4895	4.4895	4.4895
ACA1_023700	hypothetical protein	4.69064	4.4895	5.1739	4.4895	4.4895	4.4895	4.4895	4.4895	4.4895
ACA1_023830	hypothetical protein	4.59358	4.4895	4.4895	4.4895	4.4895	4.4895	4.4895	4.4895	4.4895
ACA1_023840	hypothetical protein	4.69064	4.4895	4.4895	4.4895	4.4895	4.4895	4.4895	4.4895	4.4895
ACA1_024010	RGP1 retrograde golgi transport protein, putat	5.62494	4.4895	5.1739	4.4895	4.4895	4.4895	4.4895	4.4895	4.4895
ACA1_024020	RhoGAP domain containing protein	7.13017	6.34145	6.50213	4.4895	4.4895	4.4895	4.4895	4.4895	4.4895
ACA1_024150	hypothetical protein	5.02438	5.01053	4.4895	4.4895	4.4895	4.4895	4.4895	4.4895	4.4895
ACA1_024170	jumonji domain containing 8, putative	4.69064	4.4895	4.4895	4.4895	4.4895	4.4895	4.4895	4.4895	4.4895
ACA1_024250	hypothetical protein	5.52318	5.01053	5.1739	4.4895	4.4895	4.4895	4.4895	4.4895	4.4895
ACA1_024380	myosin1, putative	11.5499	11.2151	10.9557	11.24	12.1659	10.8576	10.7724	10.4319	10.1894
ACA1_024400	hypothetical protein	4.78159	5.01053	4.4895	4.4895	4.4895	4.4895	4.4895	4.4895	4.4895
ACA1_024980	hypothetical protein	5.23214	5.94363	4.4895	4.4895	4.4895	4.4895	4.4895	4.4895	4.4895
ACA1_025550	L1P family protein	5.02438	5.01053	5.1739	4.4895	4.4895	4.4895	4.4895	4.4895	4.4895
ACA1_025700	DHHC zinc finger domain containing protein	5.23214	4.4895	4.4895	4.4895	4.4895	4.4895	4.4895	4.4895	4.4895
ACA1_025980	hypothetical protein	5.09701	5.39251	5.6362	4.4895	4.4895	4.4895	4.4895	4.4895	4.4895
ACA1_026830	hypothetical protein	4.69064	4.4895	4.4895	4.4895	4.4895	4.4895	4.4895	4.4895	4.4895
ACA1_026980	hypothetical protein	6.0839	5.94363	5.1739	4.4895	4.4895	4.4895	4.4895	4.4895	4.4895
ACA1_027040	protein kinase, putative	5.52318	5.39251	6.50213	4.4895	4.4895	4.4895	4.4895	4.4895	4.4895
ACA1_027150	hypothetical protein	4.69064	4.4895	4.4895	4.4895	4.4895	4.4895	4.4895	4.4895	4.4895
ACA1_027780	RasGEF domain containing protein	10.3419	9.83231	9.80602	10.2534	10.376	10.2814	9.79076	10.374	10.1894
ACA1_027800	pentatricopeptide repeat domain containing protein	6.01059	6.50559	6.26693	4.4895	4.4895	4.4895	4.4895	4.4895	4.4895
ACA1_027810	hypothetical protein	6.01059	6.15621	6.50213	4.4895	4.4895	4.4895	4.4895	4.4895	4.4895
ACA1_028670	protein pho	12.8855	12.8815	12.2797	12.0416	11.6833	12.2617	10.7724	9.71052	9.97163
ACA1_029640	SNF2 family Nterminal doma	4.78159	4.4895	4.4895	4.4895	4.4895	4.4895	4.4895	4.4895	4.4895
ACA1_029840	hypothetical protein	4.86714	4.4895	4.4895	4.4895	4.4895	4.4895	4.4895	4.4895	4.4895
ACA1_030050	hypothetical protein	4.59358	4.4895	4.4895	4.4895	4.4895	4.4895	4.4895	4.4895	4.4895
ACA1_030800	HMG (high mobility group) box domain contain	6.28381	5.94363	6.26693	4.4895	4.4895	4.4895	4.4895	4.4895	4.4895
ACA1_030810	thioredoxin domain containing protein	4.69064	4.4895	4.4895	4.4895	4.4895	4.4895	4.4895	4.4895	4.4895
ACA1_031140	hypothetical protein	5.09701	4.4895	4.4895	4.4895	4.4895	4.4895	4.4895	4.4895	4.4895
ACA1_031520	0	4.9479	5.01053	5.6362	4.4895	4.4895	4.4895	4.4895	4.4895	4.4895
ACA1_031630	EMP/nonaspanin domain family protein	5.57496	5.39251	5.1739	4.4895	4.4895	4.4895	4.4895	4.4895	4.4895
ACA1_031660	catalase	10.9562	10.7828	10.1383	11.24	10.9529	11.8489	11.3511	10.3137	9.97163
ACA1_031800	von Willebrand factor type A domain containing protein	5.02438	4.4895	5.6362	4.4895	4.4895	4.4895	4.4895	4.4895	4.4895
ACA1_031820	SH3 domain containing protein	5.23214	5.01053	5.6362	4.4895	4.4895	4.4895	4.4895	4.4895	4.4895
ACA1_031830	hypothetical protein	5.02438	4.4895	4.4895	4.4895	4.4895	4.4895	4.4895	4.4895	4.4895
ACA1_031860	slime mold cyclic amp receptor prote	6.04771	5.39251	5.6362	4.4895	4.4895	4.4895	4.4895	4.4895	4.4895
ACA1_031920	Fbox domain containing protein	4.69064	4.4895	4.4895	4.4895	4.4895	4.4895	4.4895	4.4895	4.4895
ACA1_031990	hypothetical protein	5.23214	5.69423	5.1739	4.4895	4.4895	4.4895	4.4895	4.4895	4.4895
ACA1_032210	dioxygenase, putative	4.59358	4.4895	4.4895	4.4895	4.4895	4.4895	4.4895	4.4895	4.4895
ACA1_033140	rieske [2fe2s] domain containing protein	5.02438	4.4895	4.4895	4.4895	4.4895	4.4895	4.4895	4.4895	4.4895
ACA1_033250	hypothetical protein	4.59358	4.4895	4.4895	4.4895	4.4895	4.4895	4.4895	4.4895	4.4895
ACA1_033370	tetracyclineefflux transporter, putative	4.69064	4.4895	4.4895	4.4895	4.4895	4.4895	4.4895	4.4895	4.4895
ACA1_033390	hypothetical protein	6.01059	5.94363	5.1739	4.4895	4.4895	4.4895	4.4895	4.4895	4.4895
ACA1_033400	Spindle pole body protein Spc98 family protein	6.8856	5.69423	5.6362	4.4895	4.4895	4.4895	4.4895	4.4895	4.4895
ACA1_033410	hypothetical protein	4.69064	4.4895	5.1739	4.4895	4.4895	4.4895	4.4895	4.4895	4.4895
ACA1_033430	hypothetical protein	4.78159	5.01053	4.4895	4.4895	4.4895	4.4895	4.4895	4.4895	4.4895
ACA1_033440	hypothetical protein	5.16615	5.39251	5.6362	4.4895	4.4895	4.4895	4.4895	4.4895	4.4895
ACA1_033500	ATPase, AAA domain containing protein	5.67324	5.39251	5.1739	4.4895	4.4895	4.4895	4.4895	4.4895	4.4895
ACA1_033510	AAA family ATPase	5.02438	4.4895	4.4895	4.4895	4.4895	4.4895	4.4895	4.4895	4.4895
ACA1_033600	hypothetical protein	6.71149	7.12636	6.26693	4.4895	4.4895	4.4895	4.4895	6.26343	4.4895
ACA1_033640	Ser/Thr phosphatase family protein	6.45937	6.15621	5.98576	4.4895	4.4895	4.4895	4.4895	4.4895	4.4895
ACA1_033770	MYC binding protein 2, putative	5.76526	5.69423	5.98576	4.4895	4.4895	4.4895	4.4895	6.26343	4.4895
ACA1_034040	ankyrin repeat-containing protein	5.16615	4.4895	4.4895	4.4895	4.4895	4.4895	4.4895	4.4895	4.4895
ACA1_034060	hypothetical protein	5.02438	5.01053	4.4895	4.4895	4.4895	4.4895	4.4895	4.4895	4.4895
ACA1_034070	hypothetical protein	5.57496	5.01053	4.4895	4.4895	4.4895	4.4895	4.4895	4.4895	4.4895
ACA1_034130	solute carrier family protein	4.78159	5.01053	5.6362	4.4895	4.4895	4.4895	4.4895	4.4895	4.4895
ACA1_034140	urea transporter, putative	4.69064	4.4895	4.4895	4.4895	4.4895	4.4895	4.4895	4.4895	4.4895
ACA1_034330	translation elongation factor1 alpha, putative	4.9479	5.01053	5.1739	4.4895	4.4895	4.4895	4.4895	4.4895	4.4895
ACA1_034500	hypothetical protein	4.78159	5.01053	5.1739	4.4895	4.4895	4.4895	4.4895	4.4895	4.4895
ACA1_034580	hypothetical protein	4.78159	4.4895	4.4895	4.4895	4.4895	4.4895	4.4895	4.4895	4.4895
ACA1_034930	hypothetical protein	4.59358	4.4895	4.4895	4.4895	4.4895	4.4895	4.4895	4.4895	4.4895
ACA1_035240	hypothetical protein	4.78159	4.4895	4.4895	4.4895	4.4895	4.4895	4.4895	4.4895	4.4895
ACA1_035300	glutaminase GtaA, putative	7.64802	7.63185	6.50213	4.4895	4.4895	4.4895	4.4895	4.4895	4.4895
ACA1_035320	hypothetical protein	4.69064	4.4895	4.4895	4.4895	4.4895	4.4895	4.4895	4.4895	4.4895
ACA1_035440	CUE domain containing protein	6.3146	5.69423	5.6362	4.4895	4.4895	4.4895	4.4895	4.4895	4.4895
ACA1_035650	SAM domain (Sterile alpha motif) domain containing protein	5.41371	5.69423	5.1739	4.4895	4.4895	4.4895	4.4895	4.4895	4.4895
ACA1_035780	hypothetical protein	4.59358	4.4895	4.4895	4.4895	4.4895	4.4895	4.4895	4.4895	4.4895
ACA1_036000	DEAD/DEAH box helicase domain	6.844	6.50559	5.6362	4.4895	4.4895	4.4895	4.4895	4.4895	4.4895
ACA1_036060	methyltransferase domain containing protein	5.09701	4.4895	5.1739	4.4895	4.4895	4.4895	4.4895	4.4895	4.4895
ACA1_036210	WD domain, G-beta repeat-containing protein	4.86714	4.4895	4.4895	4.4895	4.4895	4.4895	4.4895	4.4895	4.4895
ACA1_036350	hypothetical protein	4.86714	5.01053	4.4895	4.4895	4.4895	4.4895	4.4895	4.4895	4.4895
ACA1_036440	Ras subfamily protein	4.9479	4.4895	5.1739	4.4895	4.4895	4.4895	4.4895	4.4895	4.4895
ACA1_036450	hypothetical protein	5.02438	4.4895	4.4895	4.4895	4.4895	4.4895	4.4895	4.4895	4.4895
ACA1_036510	phosphate ABC transporter, putative	7.27807	7.48221	7.18178	4.4895	4.4895	4.4895	4.4895	6.26343	4.4895
ACA1_036520	WD domain, G-beta repeat-containing protein	7.42637	6.90898	6.50213	4.4895	4.4895	4.4895	4.4895	4.4895	4.4895
ACA1_036610	protein kinase domain containing protein	5.67324	5.69423	5.98576	4.4895	4.4895	4.4895	4.4895	4.4895	4.4895
ACA1_036640	hypothetical protein	4.9479	5.01053	5.1739	4.4895	4.4895	4.4895	4.4895	4.4895	4.4895
ACA1_036880	hypothetical protein	5.89313	5.94363	5.6362	4.4895	4.4895	4.4895	4.4895	4.4895	4.4895
ACA1_036980	hypothetical protein	5.29523	5.39251	5.1739	4.4895	4.4895	4.4895	4.4895	4.4895	4.4895
ACA1_037030	hypothetical protein	4.69064	5.01053	5.6362	4.4895	4.4895	4.4895	4.4895	4.4895	4.4895
ACA1_037060	DIL domain containing protein	5.71999	5.39251	6.26693	4.4895	4.4895	4.4895	4.4895	4.4895	4.4895
ACA1_037110	hypothetical protein	10.1821	10.1125	11.1586	12.2333	12.5269	12.07	12.0831	11.9624	10.3786
ACA1_037150	Oryza sativa (japonica cultivar-group) family protein, putative	4.9479	4.4895	4.4895	4.4895	4.4895	4.4895	4.4895	4.4895	4.4895
ACA1_037220	hypothetical protein	5.29523	4.4895	4.4895	4.4895	4.4895	4.4895	4.4895	4.4895	4.4895
ACA1_037430	hypothetical protein	6.3146	6.50559	5.6362	4.4895	4.4895	4.4895	4.4895	4.4895	4.4895
ACA1_037450	hypothetical protein	5.57496	5.01053	4.4895	4.4895	4.4895	4.4895	4.4895	4.4895	4.4895
ACA1_037490	hypothetical protein	5.16615	4.4895	5.1739	4.4895	4.4895	4.4895	4.4895	4.4895	4.4895
ACA1_037720	Fbox domain containing protein	5.41371	4.4895	5.1739	4.4895	4.4895	4.4895	4.4895	4.4895	4.4895
ACA1_037730	transmembrane protein, putative	4.78159	4.4895	4.4895	4.4895	4.4895	4.4895	4.4895	4.4895	4.4895
ACA1_037750	threonyltRNA synthetase, putative	5.41371	5.39251	5.1739	4.4895	4.4895	4.4895	4.4895	4.4895	4.4895
ACA1_037810	dual specificity phosphatase, putati	5.02438	4.4895	4.4895	4.4895	4.4895	4.4895	4.4895	4.4895	4.4895
ACA1_037830	hypothetical protein	5.02438	4.4895	4.4895	4.4895	4.4895	4.4895	4.4895	4.4895	4.4895
ACA1_037840	hypothetical protein	5.46948	5.01053	5.1739	4.4895	4.4895	4.4895	4.4895	4.4895	4.4895
ACA1_038200	Fbox domain containing protein	4.9479	4.4895	4.4895	4.4895	4.4895	4.4895	4.4895	4.4895	4.4895
ACA1_038290	hypothetical protein	4.69064	4.4895	4.4895	4.4895	4.4895	4.4895	4.4895	4.4895	4.4895
ACA1_038320	triosephosphate isomerase	5.29523	5.39251	4.4895	4.4895	4.4895	4.4895	4.4895	4.4895	4.4895
ACA1_038390	R3H domain containing protein	6.61586	6.65295	5.6362	4.4895	4.4895	4.4895	4.4895	4.4895	4.4895
ACA1_038400	hypothetical protein	5.57496	5.01053	5.1739	4.4895	4.4895	4.4895	4.4895	4.4895	4.4895
ACA1_038410	hypothetical protein	4.59358	4.4895	4.4895	4.4895	4.4895	4.4895	4.4895	4.4895	4.4895
ACA1_038450	hypothetical protein	5.67324	5.39251	5.1739	4.4895	4.4895	4.4895	4.4895	4.4895	4.4895
ACA1_038480	leucine rich repeat containing protein	6.0839	5.69423	5.6362	4.4895	4.4895	4.4895	4.4895	4.4895	4.4895
ACA1_038530	AMPbinding enzyme, putative	5.29523	5.01053	5.6362	4.4895	4.4895	4.4895	4.4895	4.4895	4.4895
ACA1_039320	hypothetical protein	4.78159	4.4895	4.4895	4.4895	4.4895	4.4895	4.4895	4.4895	4.4895
ACA1_039520	hypothetical protein	4.78159	4.4895	4.4895	4.4895	4.4895	4.4895	4.4895	4.4895	4.4895
ACA1_040190	hypothetical protein	6.64037	6.34145	5.6362	4.4895	4.4895	4.4895	4.4895	4.4895	4.4895
ACA1_040200	AMPactivated protein kina	4.69064	5.01053	4.4895	4.4895	4.4895	4.4895	4.4895	4.4895	4.4895
ACA1_040510	ubiquitin domain containing protein	6.0839	6.15621	5.98576	4.4895	4.4895	4.4895	4.4895	4.4895	4.4895
ACA1_040640	transporter, major facilitator subfamily protein	5.57496	5.39251	4.4895	4.4895	4.4895	4.4895	4.4895	4.4895	4.4895
ACA1_040650	hypothetical protein	4.9479	4.4895	5.1739	4.4895	4.4895	4.4895	4.4895	4.4895	4.4895
ACA1_040680	ATPase/histidine kinase/DNA gyrase B/HSP90 domain containing protein	4.9479	4.4895	4.4895	4.4895	4.4895	4.4895	4.4895	4.4895	4.4895
ACA1_040690	multisensor hybrid histidine kinase	5.71999	5.39251	5.1739	4.4895	4.4895	4.4895	4.4895	4.4895	4.4895
ACA1_040700	GLE1 family protein	6.15366	6.50559	5.6362	4.4895	4.4895	4.4895	4.4895	4.4895	4.4895
ACA1_040780	hypothetical protein	4.9479	4.4895	4.4895	4.4895	4.4895	4.4895	4.4895	4.4895	4.4895
ACA1_040790	elongation factor 2, putative	6.04771	5.69423	4.4895	4.4895	4.4895	4.4895	4.4895	4.4895	4.4895
ACA1_041430	hypothetical protein	5.62494	5.69423	4.4895	4.4895	4.4895	4.4895	4.4895	4.4895	4.4895
ACA1_041740	hypothetical protein	4.69064	4.4895	4.4895	4.4895	4.4895	4.4895	4.4895	4.4895	4.4895
ACA1_041910	0	4.78159	4.4895	4.4895	4.4895	4.4895	4.4895	4.4895	4.4895	4.4895
ACA1_041970	hypothetical protein	5.09701	5.01053	5.1739	4.4895	4.4895	4.4895	4.4895	4.4895	4.4895
ACA1_042030	Sumo domain containing protein	6.28381	5.69423	5.6362	4.4895	4.4895	4.4895	4.4895	4.4895	4.4895
ACA1_042210	SH2 domain containing Signal transducer and activator of transcription, pu	9.0633	8.65655	9.04165	10.2534	9.40022	9.30718	10.7724	10.1159	8.44982
ACA1_042220	hypothetical protein	4.69064	4.4895	4.4895	4.4895	4.4895	4.4895	4.4895	4.4895	4.4895
ACA1_042240	hypothetical protein	6.28381	5.94363	6.70431	4.4895	4.4895	4.4895	4.4895	4.4895	4.4895
ACA1_042270	hypothetical protein	5.62494	5.39251	5.1739	4.4895	4.4895	4.4895	4.4895	4.4895	4.4895
ACA1_042820	hypothetical protein	4.78159	4.4895	5.1739	4.4895	4.4895	4.4895	4.4895	4.4895	4.4895
ACA1_042830	hypothetical protein	4.69064	4.4895	4.4895	4.4895	4.4895	4.4895	4.4895	4.4895	4.4895
ACA1_042840	hypothetical protein	4.69064	4.4895	4.4895	4.4895	4.4895	4.4895	4.4895	4.4895	4.4895
ACA1_042850	hypothetical protein	6.15366	4.4895	5.1739	4.4895	4.4895	4.4895	4.4895	4.4895	4.4895
ACA1_042860	carrier superfamily protein	6.15366	5.39251	4.4895	4.4895	4.4895	4.4895	4.4895	4.4895	4.4895
ACA1_042880	hypothetical protein	4.69064	4.4895	4.4895	4.4895	4.4895	4.4895	4.4895	4.4895	4.4895
ACA1_043100	dual specificity protein kinase, putative	6.1192	6.15621	5.6362	4.4895	4.4895	4.4895	4.4895	4.4895	4.4895
ACA1_043220	oxidoreductase family protein	7.14737	6.50559	5.6362	4.4895	4.4895	4.4895	4.4895	4.4895	4.4895
ACA1_043230	hypothetical protein	5.35569	5.39251	5.1739	4.4895	4.4895	4.4895	4.4895	4.4895	4.4895
ACA1_043240	Ran GTPase binding, putative	4.59358	4.4895	4.4895	4.4895	4.4895	4.4895	4.4895	4.4895	4.4895
ACA1_043300	shortchain dehydrogenase	6.56556	6.65295	5.98576	4.4895	4.4895	4.4895	4.4895	4.4895	4.4895
ACA1_043340	hypothetical protein	4.86714	5.39251	4.4895	4.4895	4.4895	4.4895	4.4895	4.4895	4.4895
ACA1_043580	calmodulinbinding protein, putative	6.25236	6.15621	4.4895	4.4895	4.4895	4.4895	4.4895	4.4895	4.4895
ACA1_043640	poly ADP-ribose glycohydrolase (PAR	6.28381	5.69423	5.1739	4.4895	4.4895	4.4895	4.4895	4.4895	4.4895
ACA1_044000	PHDfinger domain containing protein	4.69064	5.01053	4.4895	4.4895	4.4895	4.4895	4.4895	4.4895	4.4895
ACA1_044130	hypothetical protein	4.86714	4.4895	4.4895	4.4895	4.4895	4.4895	4.4895	4.4895	4.4895
ACA1_044460	hypothetical protein	5.85176	5.01053	5.98576	4.4895	4.4895	4.4895	4.4895	4.4895	4.4895
ACA1_044740	hypothetical protein	4.59358	4.4895	5.1739	4.4895	4.4895	4.4895	4.4895	4.4895	4.4895
ACA1_045080	thioredoxin, putative	5.02438	5.69423	5.1739	4.4895	4.4895	4.4895	4.4895	4.4895	4.4895
ACA1_045210	tRNA nucleotidyltransferase, putative	5.09701	5.69423	5.6362	4.4895	4.4895	4.4895	4.4895	4.4895	4.4895
ACA1_045300	nicotinamide n-methyltran	5.09701	5.01053	5.1739	4.4895	4.4895	4.4895	4.4895	4.4895	4.4895
ACA1_045310	Ras GTPase rap1b, putative	13.082	13.114	12.5691	12.816	12.3576	12.4309	12.3449	12.0012	12.1162
ACA1_045390	mitogenactivated (MAP) kinase	4.78159	4.4895	5.1739	4.4895	4.4895	4.4895	4.4895	4.4895	4.4895
ACA1_045460	morn motif-containing protein	5.62494	5.01053	5.1739	4.4895	4.4895	4.4895	4.4895	4.4895	4.4895
ACA1_045470	PH domain containing protein	6.48666	5.94363	5.98576	4.4895	4.4895	4.4895	4.4895	4.4895	4.4895
ACA1_045590	Arf GTPase activating protein	4.69064	4.4895	4.4895	4.4895	4.4895	4.4895	4.4895	4.4895	4.4895
ACA1_045660	hypothetical protein	4.69064	4.4895	4.4895	4.4895	4.4895	4.4895	4.4895	4.4895	4.4895
ACA1_045930	hypothetical protein	4.9479	4.4895	5.1739	4.4895	4.4895	4.4895	4.4895	4.4895	4.4895
ACA1_045950	Peptide-aspartate beta-dioxygenase	6.04771	6.34145	5.98576	4.4895	4.4895	4.4895	4.4895	4.4895	4.4895
ACA1_045960	hypothetical protein	5.35569	5.01053	5.1739	4.4895	4.4895	4.4895	4.4895	4.4895	4.4895
ACA1_045970	hypothetical protein	5.41371	5.39251	4.4895	4.4895	4.4895	4.4895	4.4895	4.4895	4.4895
ACA1_045990	Diacylglycerol acyltransferase, putative	4.69064	4.4895	5.1739	4.4895	4.4895	4.4895	4.4895	4.4895	4.4895
ACA1_046020	hypothetical protein	4.78159	4.4895	4.4895	4.4895	4.4895	4.4895	4.4895	4.4895	4.4895
ACA1_046030	Ankyrin repeat containing protein	5.02438	5.01053	4.4895	4.4895	4.4895	4.4895	4.4895	4.4895	4.4895
ACA1_046080	hypothetical protein	4.78159	5.01053	4.4895	4.4895	4.4895	4.4895	4.4895	4.4895	4.4895
ACA1_046120	hypothetical protein	4.69064	4.4895	4.4895	4.4895	4.4895	4.4895	4.4895	4.4895	4.4895
ACA1_046170	kelch repeat-containing protein	5.97249	5.69423	5.6362	4.4895	4.4895	4.4895	4.4895	4.4895	4.4895
ACA1_046440	Fbox domain containing protein	6.66447	6.65295	5.6362	4.4895	4.4895	4.4895	4.4895	4.4895	4.4895
ACA1_046480	DNA methyltransferase dnmt5, p	5.46948	5.39251	5.6362	4.4895	4.4895	4.4895	4.4895	4.4895	4.4895
ACA1_046500	hypothetical protein	5.35569	5.39251	5.1739	4.4895	4.4895	4.4895	4.4895	4.4895	4.4895
ACA1_046510	hypothetical protein	6.22021	6.15621	6.26693	4.4895	4.4895	4.4895	4.4895	4.4895	4.4895
ACA1_046520	hypothetical protein	5.02438	4.4895	5.6362	4.4895	4.4895	4.4895	4.4895	4.4895	4.4895
ACA1_046540		5.02438	5.01053	5.98576	4.4895	4.4895	4.4895	4.4895	4.4895	4.4895
ACA1_046580	homeobox domain containing protein	5.62494	4.4895	4.4895	4.4895	4.4895	4.4895	4.4895	4.4895	4.4895
ACA1_046740	Transmembrane amino acid transporter, putative	5.89313	6.34145	5.6362	4.4895	4.4895	4.4895	4.4895	4.4895	4.4895
ACA1_046850	OTU family cysteine protease	4.69064	4.4895	4.4895	4.4895	4.4895	4.4895	4.4895	4.4895	4.4895
ACA1_047400	hypothetical protein	4.69064	4.4895	5.1739	4.4895	4.4895	4.4895	4.4895	4.4895	4.4895
ACA1_047410	hypothetical protein	4.59358	4.4895	4.4895	4.4895	4.4895	4.4895	4.4895	4.4895	4.4895
ACA1_047630	hypothetical protein	4.86714	5.01053	5.1739	4.4895	4.4895	4.4895	4.4895	6.26343	4.4895
ACA1_047930	hypothetical protein	5.02438	4.4895	5.6362	4.4895	4.4895	4.4895	4.4895	4.4895	4.4895
ACA1_048040	zinc finger, c2h2 type domain containing protein	5.46948	5.39251	4.4895	4.4895	4.4895	4.4895	4.4895	4.4895	4.4895
ACA1_048150	hypothetical protein	6.40319	5.39251	5.1739	4.4895	4.4895	4.4895	4.4895	4.4895	4.4895
ACA1_048180	Dual specificity protein kinase	4.78159	5.01053	5.1739	4.4895	4.4895	4.4895	4.4895	6.26343	4.4895
ACA1_048210	ribosomal protein S5, putative	15.3761	15.6895	17.0883	14.6202	13.6759	13.428	11.3511	11.8394	11.3664
ACA1_048220	hypothetical protein	7.05924	5.94363	5.1739	4.4895	4.4895	4.4895	4.4895	4.4895	4.4895
ACA1_048240	adipose-regulatory protein (Seipin) protein	5.57496	5.01053	4.4895	4.4895	4.4895	4.4895	4.4895	4.4895	4.4895
ACA1_048260	hypothetical protein	4.69064	4.4895	4.4895	4.4895	4.4895	4.4895	4.4895	4.4895	4.4895
ACA1_048490	alphaCOP, putative	9.89688	9.84769	9.91192	10.2534	11.3638	11.2683	11.7631	9.71052	9.97163
ACA1_048510	hypothetical protein	5.09701	5.01053	5.6362	4.4895	4.4895	4.4895	4.4895	4.4895	4.4895
ACA1_049530	mitochondrial RNA ligase 2, putative	4.69064	4.4895	4.4895	4.4895	4.4895	4.4895	4.4895	4.4895	4.4895
ACA1_050000	hypothetical protein	5.29523	5.01053	5.1739	4.4895	4.4895	4.4895	4.4895	4.4895	4.4895
ACA1_050120	transporter, major facilitator subfamily protein	6.59093	5.39251	5.98576	4.4895	4.4895	4.4895	4.4895	4.4895	4.4895
ACA1_050140	isopentenyldiphosphate delta-isomerase	5.76526	5.94363	6.26693	4.4895	4.4895	4.4895	4.4895	4.4895	4.4895
ACA1_050330	hypothetical protein	7.13017	5.94363	7.03949	4.4895	4.4895	4.4895	4.4895	6.26343	4.4895
ACA1_050390	3-oxoacyl-[acyl-carrier	4.59358	4.4895	4.4895	4.4895	4.4895	4.4895	4.4895	4.4895	4.4895
ACA1_050430	dual specificity protein phosphatase	5.76526	5.39251	5.1739	4.4895	4.4895	4.4895	4.4895	4.4895	4.4895
ACA1_050440	ankyrin repeat containing protein	5.71999	5.01053	5.1739	4.4895	4.4895	4.4895	4.4895	4.4895	4.4895
ACA1_050460	solute carrier family protein, putative	5.41371	5.01053	4.4895	4.4895	4.4895	4.4895	4.4895	4.4895	4.4895
ACA1_050480	hypothetical protein	5.97249	5.39251	5.6362	4.4895	4.4895	4.4895	4.4895	7.03539	7.53965
ACA1_050620	TFIIH basal transcription factor c	4.69064	4.4895	4.4895	4.4895	4.4895	4.4895	4.4895	4.4895	4.4895
ACA1_050760	thiamine pyrophosphokinase	5.23214	5.01053	5.1739	4.4895	4.4895	4.4895	4.4895	4.4895	4.4895
ACA1_051110	hypothetical protein	6.3146	5.39251	5.1739	4.4895	4.4895	4.4895	4.4895	4.4895	4.4895
ACA1_051680	Ras subfamily protein	5.35569	5.01053	4.4895	4.4895	4.4895	4.4895	4.4895	4.4895	4.4895
ACA1_051710	hypothetical protein	7.29361	6.65295	5.98576	4.4895	4.4895	4.4895	4.4895	4.4895	4.4895
ACA1_051880	autophagy protein 8 (ATG8), putative	10.1841	9.68596	9.11444	9.27968	9.40022	9.30718	9.79076	8.65452	9.71504
ACA1_051890	hypothetical protein	5.09701	5.01053	5.1739	4.4895	4.4895	4.4895	4.4895	4.4895	4.4895
ACA1_051910	twocomponent hybrid sensor and regulator kinase	5.41371	4.4895	5.98576	4.4895	4.4895	4.4895	4.4895	4.4895	4.4895
ACA1_051930	hypothetical protein	5.52318	5.69423	5.1739	4.4895	4.4895	4.4895	4.4895	4.4895	4.4895
ACA1_052180	apoptosisrelated protein PNAS-4, putative	5.41371	5.39251	4.4895	4.4895	4.4895	4.4895	4.4895	4.4895	4.4895
ACA1_052230	hypothetical protein	5.02438	5.01053	4.4895	4.4895	4.4895	4.4895	4.4895	4.4895	4.4895
ACA1_052260	leucine rich repeat domain containing protein	5.67324	5.94363	4.4895	4.4895	4.4895	4.4895	4.4895	4.4895	4.4895
ACA1_052270	Ankyrin repeat containing protein	5.62494	5.01053	5.6362	4.4895	4.4895	4.4895	4.4895	4.4895	4.4895
ACA1_052280	hypothetical protein	4.86714	4.4895	4.4895	4.4895	4.4895	4.4895	4.4895	4.4895	4.4895
ACA1_052290	hypothetical protein	5.02438	4.4895	4.4895	4.4895	4.4895	4.4895	4.4895	4.4895	4.4895
ACA1_052300	hypothetical protein	5.57496	4.4895	5.1739	4.4895	4.4895	4.4895	4.4895	4.4895	4.4895
ACA1_052330	leucine rich repeat domain containing protein	6.40319	6.65295	6.50213	4.4895	4.4895	4.4895	4.4895	4.4895	4.4895
ACA1_052520	0	6.15366	5.69423	5.6362	4.4895	4.4895	4.4895	4.4895	4.4895	4.4895
ACA1_052560	glucose dehydrogenase	4.69064	5.01053	4.4895	4.4895	4.4895	4.4895	4.4895	4.4895	4.4895
ACA1_052580	hypothetical protein	5.09701	5.69423	5.6362	4.4895	4.4895	4.4895	4.4895	7.03539	4.4895
ACA1_052690	RhoGAP domain containing protein	5.62494	5.69423	5.6362	4.4895	4.4895	4.4895	4.4895	4.4895	4.4895
ACA1_052730	cytidine and deoxycytidylate deaminase zincbinding region domain containin	5.67324	5.39251	4.4895	4.4895	4.4895	4.4895	4.4895	4.4895	4.4895
ACA1_052760	hypothetical protein	4.59358	4.4895	5.1739	4.4895	4.4895	4.4895	4.4895	4.4895	4.4895
ACA1_052770	Ubiquitinconjugating enzyme subfamily protein	4.86714	4.4895	4.4895	4.4895	4.4895	4.4895	4.4895	4.4895	4.4895
ACA1_052780	Fbox domain containing protein	5.02438	4.4895	4.4895	4.4895	4.4895	4.4895	4.4895	4.4895	4.4895
ACA1_053000	MYND finger domain containing protein	4.69064	4.4895	4.4895	4.4895	4.4895	4.4895	4.4895	4.4895	4.4895
ACA1_053230	xylosyltransferase I, putative	5.23214	5.39251	5.1739	4.4895	4.4895	4.4895	4.4895	4.4895	4.4895
ACA1_053270	hydrolase, NUDIX domain containing protein	5.02438	5.39251	5.6362	4.4895	4.4895	4.4895	4.4895	4.4895	4.4895
ACA1_053320	actin subfamily protein	5.46948	5.39251	4.4895	4.4895	4.4895	4.4895	4.4895	4.4895	4.4895
ACA1_053430	DSBA family thioredoxin domain containing protein	4.59358	4.4895	5.1739	4.4895	4.4895	4.4895	4.4895	4.4895	4.4895
ACA1_053480	Longevityassurance protein (LAG1) domain contain	4.69064	4.4895	4.4895	4.4895	4.4895	4.4895	4.4895	4.4895	4.4895
ACA1_053490	Nucleotide binding protein 1like protein, putative	5.46948	5.69423	5.1739	4.4895	4.4895	4.4895	4.4895	4.4895	4.4895
ACA1_053620	hypothetical protein	5.02438	4.4895	4.4895	4.4895	4.4895	4.4895	4.4895	4.4895	4.4895
ACA1_053650	hypothetical protein	5.80916	5.39251	4.4895	4.4895	4.4895	4.4895	4.4895	4.4895	4.4895
ACA1_053660	TNF receptor-associated protein 1, putative	7.6113	7.02176	5.98576	4.4895	4.4895	4.4895	4.4895	4.4895	4.4895
ACA1_053790	protein kinase domain containing protein	5.57496	5.39251	5.1739	4.4895	4.4895	4.4895	4.4895	6.26343	4.4895
ACA1_053820	peroxisomal membrane anchor protein (pex14p) region protein, putative	4.9479	5.01053	4.4895	4.4895	4.4895	4.4895	4.4895	4.4895	4.4895
ACA1_054010	galactosyl transferase GMA12/MNN10 family protein	6.43155	6.34145	5.6362	4.4895	4.4895	4.4895	4.4895	4.4895	4.4895
ACA1_054100	diacylglycerol kinase, putative	7.27807	6.50559	5.98576	4.4895	4.4895	4.4895	4.4895	4.4895	4.4895
ACA1_054110	Ras subfamily protein	4.9479	5.01053	5.1739	4.4895	4.4895	4.4895	4.4895	4.4895	4.4895
ACA1_054120	protein kinase domain containing protein	5.41371	4.4895	4.4895	4.4895	4.4895	4.4895	4.4895	4.4895	4.4895
ACA1_054280	hypothetical protein	4.86714	4.4895	4.4895	4.4895	4.4895	4.4895	4.4895	4.4895	4.4895
ACA1_054300	Ras subfamily protein	4.78159	4.4895	4.4895	4.4895	4.4895	4.4895	4.4895	4.4895	4.4895
ACA1_054320	PremRNA processing splicing factor 8, putative	10.9744	11.1421	11.6921	12.4025	11.9447	12.4309	12.0831	12.3253	12.489
ACA1_054340	Eukaryotic initiation factor 4A, putative	15.0754	15.0368	15.6873	14.6872	14.353	13.8423	13.6631	12.7	13.0583
ACA1_054380	Histone-lysine N-methyltransferase	7.57362	6.15621	5.6362	4.4895	4.4895	4.4895	4.4895	4.4895	4.4895
ACA1_054400	hypothetical protein	4.69064	4.4895	4.4895	4.4895	4.4895	4.4895	4.4895	4.4895	4.4895
ACA1_054430	SPFH domain / Band 7 domain containing protein	6.37426	5.39251	5.1739	4.4895	4.4895	4.4895	4.4895	4.4895	4.4895
ACA1_054450	hypothetical protein	5.09701	5.39251	4.4895	4.4895	4.4895	4.4895	4.4895	4.4895	4.4895
ACA1_054480	Ribosephosphate pyrophosphokinase 3, mitochondrial, putative	5.57496	5.01053	4.4895	4.4895	4.4895	4.4895	4.4895	4.4895	4.4895
ACA1_054540	Fbox domain containing protein	5.29523	4.4895	5.1739	4.4895	4.4895	4.4895	4.4895	4.4895	4.4895
ACA1_054580	serine/threonine kinase	4.59358	4.4895	4.4895	4.4895	4.4895	4.4895	4.4895	4.4895	4.4895
ACA1_054590	hypothetical protein	4.69064	4.4895	4.4895	4.4895	4.4895	4.4895	4.4895	4.4895	4.4895
ACA1_054830	hypothetical protein	5.02438	5.01053	5.1739	4.4895	4.4895	4.4895	4.4895	4.4895	4.4895
ACA1_054880	hypothetical protein	5.29523	5.69423	4.4895	4.4895	4.4895	4.4895	4.4895	4.4895	4.4895
ACA1_054960	hypothetical protein	4.59358	4.4895	4.4895	4.4895	4.4895	4.4895	4.4895	4.4895	4.4895
ACA1_054970	hypothetical protein	5.23214	5.01053	4.4895	4.4895	4.4895	4.4895	4.4895	4.4895	4.4895
ACA1_054980	leucine rich repeat domain containing protein	4.9479	5.01053	4.4895	4.4895	4.4895	4.4895	4.4895	4.4895	4.4895
ACA1_055290	Sec7 domain containing protein	4.78159	4.4895	4.4895	4.4895	4.4895	4.4895	4.4895	4.4895	4.4895
ACA1_055420	TspO/MBR family protein	5.02438	4.4895	4.4895	4.4895	4.4895	4.4895	4.4895	4.4895	4.4895
ACA1_055480	HEAT repeat domain containing protein	5.35569	5.69423	5.98576	4.4895	4.4895	4.4895	4.4895	4.4895	4.4895
ACA1_055550	hypothetical protein	5.41371	4.4895	5.1739	4.4895	4.4895	4.4895	4.4895	4.4895	4.4895
ACA1_055560	protein C16orf58 family protein	4.69064	4.4895	4.4895	4.4895	4.4895	4.4895	4.4895	4.4895	4.4895
ACA1_055800	glutathione transferase family protein	4.9479	5.01053	4.4895	4.4895	4.4895	4.4895	4.4895	4.4895	4.4895
ACA1_055820	PHD-finger domain containing protein	5.76526	5.69423	4.4895	4.4895	4.4895	4.4895	4.4895	4.4895	4.4895
ACA1_055830	cell surface protein	4.86714	4.4895	4.4895	4.4895	4.4895	4.4895	4.4895	4.4895	4.4895
ACA1_055840	hypothetical protein	5.23214	4.4895	5.1739	4.4895	4.4895	4.4895	4.4895	4.4895	4.4895
ACA1_056310	hypothetical protein	4.59358	4.4895	4.4895	4.4895	4.4895	4.4895	4.4895	4.4895	4.4895
ACA1_056430	bromodomain domain containing protein	5.46948	5.01053	4.4895	4.4895	4.4895	4.4895	4.4895	4.4895	4.4895
ACA1_056540	hypothetical protein	4.69064	4.4895	4.4895	4.4895	4.4895	4.4895	4.4895	4.4895	4.4895
ACA1_056550	hypothetical protein	4.59358	4.4895	4.4895	4.4895	4.4895	4.4895	4.4895	4.4895	4.4895
ACA1_056670	cathepsin Llike cysteine protease	4.59358	4.4895	4.4895	4.4895	4.4895	4.4895	4.4895	4.4895	4.4895
ACA1_057050	hypothetical protein	5.16615	5.01053	5.1739	4.4895	4.4895	4.4895	4.4895	4.4895	4.4895
ACA1_057110	hypothetical protein	4.69064	4.4895	4.4895	4.4895	4.4895	4.4895	4.4895	4.4895	4.4895
ACA1_057120	AlanyltRNA synthetase, putative	6.40319	6.50559	5.6362	4.4895	4.4895	4.4895	4.4895	4.4895	4.4895
ACA1_057130	Ras subfamily protein	4.9479	5.39251	4.4895	4.4895	4.4895	4.4895	4.4895	4.4895	4.4895
ACA1_057160	HPP family protein	5.41371	5.69423	5.1739	4.4895	4.4895	4.4895	4.4895	4.4895	4.4895
ACA1_057170	hypothetical protein	5.71999	5.94363	5.1739	4.4895	4.4895	4.4895	4.4895	4.4895	4.4895
ACA1_057220	hypothetical protein	5.46948	5.01053	5.6362	4.4895	4.4895	4.4895	4.4895	4.4895	4.4895
ACA1_057240	MIT domain containing protein	5.16615	4.4895	5.6362	4.4895	4.4895	4.4895	4.4895	4.4895	4.4895
ACA1_057270	hypothetical protein	4.59358	4.4895	4.4895	4.4895	4.4895	4.4895	4.4895	4.4895	4.4895
ACA1_057280	peptidase, S8/S53 subfamily protein	5.57496	4.4895	4.4895	4.4895	4.4895	4.4895	4.4895	4.4895	4.4895
ACA1_057290	hypothetical protein	4.78159	4.4895	5.6362	4.4895	4.4895	4.4895	4.4895	4.4895	4.4895
ACA1_057300	hypothetical protein	6.22021	5.39251	4.4895	4.4895	4.4895	4.4895	4.4895	4.4895	4.4895
ACA1_057320	RNA pseudouridine synthase, putative	5.23214	5.69423	4.4895	4.4895	4.4895	4.4895	4.4895	4.4895	4.4895
ACA1_057330	Hypothetical protein	4.9479	5.01053	5.1739	4.4895	4.4895	4.4895	4.4895	4.4895	4.4895
ACA1_057340	WD domain, G-beta repeat-containing protein	4.69064	5.01053	5.1739	4.4895	4.4895	4.4895	4.4895	4.4895	4.4895
ACA1_057390	LSM domain containing protein	5.02438	4.4895	4.4895	4.4895	4.4895	4.4895	4.4895	4.4895	4.4895
ACA1_057420	ATPase, AAA domain containing protein	5.29523	5.39251	4.4895	4.4895	4.4895	4.4895	4.4895	4.4895	4.4895
ACA1_057430	hypothetical protein	6.56556	6.50559	6.26693	4.4895	4.4895	4.4895	4.4895	4.4895	4.4895
ACA1_057810	Ras subfamily protein	5.57496	5.01053	5.1739	4.4895	4.4895	4.4895	4.4895	4.4895	4.4895
ACA1_057870	hypothetical protein	4.59358	4.4895	4.4895	4.4895	4.4895	4.4895	4.4895	4.4895	4.4895
ACA1_057950	hypothetical protein	5.97249	5.69423	5.1739	4.4895	4.4895	4.4895	4.4895	4.4895	4.4895
ACA1_058060	MAP kinase kinase	5.23214	5.69423	4.4895	4.4895	4.4895	4.4895	4.4895	4.4895	4.4895
ACA1_058090	zinc finger domain containing protein	6.37426	5.69423	5.1739	4.4895	4.4895	4.4895	4.4895	4.4895	4.4895
ACA1_058100	coppertranslocating P-type ATPase	5.76526	5.69423	5.6362	4.4895	4.4895	4.4895	4.4895	4.4895	4.4895
ACA1_058120	hypothetical protein	5.41371	5.94363	6.26693	4.4895	4.4895	4.4895	4.4895	4.4895	4.4895
ACA1_058160	homeobox domain containing protein	4.78159	4.4895	4.4895	4.4895	4.4895	4.4895	4.4895	4.4895	4.4895
ACA1_058170	SET domain containing protein	6.43155	5.39251	5.6362	4.4895	4.4895	4.4895	4.4895	4.4895	4.4895
ACA1_058190	leucine rich repeat domain containing protein	4.9479	4.4895	4.4895	4.4895	4.4895	4.4895	4.4895	4.4895	4.4895
ACA1_058220	hypothetical protein	5.46948	5.69423	5.1739	4.4895	4.4895	4.4895	4.4895	4.4895	4.4895
ACA1_058260	oxidoreductase, putative	5.52318	4.4895	4.4895	4.4895	4.4895	4.4895	4.4895	4.4895	4.4895
ACA1_058270	Ubox domain containing protein	6.1192	5.39251	5.1739	4.4895	4.4895	4.4895	4.4895	4.4895	4.4895
ACA1_058280	opioid growth factor receptor (ogfr) region protein, putative	4.78159	5.01053	5.1739	4.4895	4.4895	4.4895	4.4895	4.4895	4.4895
ACA1_058290	glycosyl transferase	5.85176	5.39251	4.4895	4.4895	4.4895	4.4895	4.4895	4.4895	4.4895
ACA1_058320	GPR1/FUN34/yaaH family protein	5.35569	5.39251	4.4895	4.4895	4.4895	4.4895	4.4895	4.4895	4.4895
ACA1_058350	LsmAD domain containing protein	7.2142	6.65295	6.26693	4.4895	4.4895	4.4895	4.4895	4.4895	4.4895
ACA1_058370	Myblike DNA-binding domain containing protein	6.15366	4.4895	5.6362	4.4895	4.4895	4.4895	4.4895	4.4895	4.4895
ACA1_058420	Fbox domain containing protein	5.23214	5.69423	4.4895	4.4895	4.4895	4.4895	4.4895	4.4895	4.4895
ACA1_058440	Fbox domain containing protein	5.35569	5.01053	4.4895	4.4895	4.4895	4.4895	4.4895	4.4895	4.4895
ACA1_058500	phenylalanyl-tRNA synthetase beta subunit, putative	4.9479	4.4895	4.4895	4.4895	4.4895	4.4895	4.4895	4.4895	4.4895
ACA1_058520	protein kinase domain containing protein	6.22021	6.65295	5.6362	4.4895	4.4895	4.4895	4.4895	4.4895	4.4895
ACA1_058540	2oxoglutarate and iron-dependent oxygenase domain containing protein 2, pu	5.41371	4.4895	5.6362	4.4895	4.4895	4.4895	4.4895	4.4895	4.4895
ACA1_058740	ATPcitrate synthase	16.4804	16.5445	17.6632	18.6424	19.2524	19.6378	19.0345	17.834	18.6337
ACA1_058770	ribosomal L15, putative	13.0363	13.321	14.5455	13.6215	12.6783	10.8576	10.7724	9.88653	10.3786
ACA1_058780	G proteincoupled receptor, putative	5.09701	5.94363	5.6362	4.4895	4.4895	4.4895	4.4895	4.4895	4.4895
ACA1_058880	hypothetical protein	4.69064	4.4895	4.4895	4.4895	4.4895	4.4895	4.4895	4.4895	4.4895
ACA1_058900	tetratricopeptide repeat domain containing protein	5.62494	5.39251	6.26693	4.4895	4.4895	4.4895	4.4895	4.4895	4.4895
ACA1_058940	TBC domain containing protein	6.15366	5.39251	5.6362	4.4895	4.4895	4.4895	4.4895	4.4895	4.4895
ACA1_059440	hypothetical protein	5.41371	5.39251	4.4895	4.4895	4.4895	4.4895	4.4895	4.4895	4.4895
ACA1_059520	dihydropyrimidinase	6.18732	5.94363	5.98576	4.4895	4.4895	4.4895	4.4895	4.4895	4.4895
ACA1_059600	hypothetical protein	6.51344	6.50559	5.98576	4.4895	4.4895	4.4895	4.4895	4.4895	4.4895
ACA1_059770	nuclear protein SET family protein, putative	6.45937	5.39251	6.26693	4.4895	4.4895	4.4895	4.4895	4.4895	4.4895
ACA1_059810	hypothetical protein	4.86714	4.4895	4.4895	4.4895	4.4895	4.4895	4.4895	4.4895	4.4895
ACA1_059830	lipase	5.41371	5.01053	4.4895	4.4895	4.4895	4.4895	4.4895	4.4895	4.4895
ACA1_059980	von Willebrand factor type A domain containing protein	5.52318	6.15621	5.6362	4.4895	4.4895	4.4895	4.4895	4.4895	4.4895
ACA1_060030	thioredoxin domain containing protein	6.22021	5.39251	5.1739	4.4895	4.4895	4.4895	4.4895	4.4895	4.4895
ACA1_060090	hypothetical protein	5.62494	5.39251	5.6362	4.4895	4.4895	4.4895	4.4895	4.4895	4.4895
ACA1_060110	hypothetical protein	5.57496	4.4895	4.4895	4.4895	4.4895	4.4895	4.4895	4.4895	4.4895
ACA1_060120	hypothetical protein	4.59358	4.4895	4.4895	4.4895	4.4895	4.4895	4.4895	4.4895	4.4895
ACA1_060160	lipase	5.16615	5.01053	5.98576	4.4895	4.4895	4.4895	4.4895	4.4895	4.4895
ACA1_060170	viral a-type inclusion protein repeat-containing protein	4.78159	5.01053	5.6362	4.4895	4.4895	4.4895	4.4895	4.4895	4.4895
ACA1_060180	hypothetical protein	4.9479	4.4895	4.4895	4.4895	4.4895	4.4895	4.4895	4.4895	4.4895
ACA1_060200	hypothetical protein	6.22021	6.34145	5.6362	4.4895	4.4895	4.4895	4.4895	4.4895	4.4895
ACA1_060220	U5 small nuclear ribonucleoprotein h	8.54555	8.75772	9.14951	10.2534	9.40022	9.30718	9.79076	9.51	9.40272
ACA1_060230	hypothetical protein	6.25236	5.69423	5.98576	4.4895	4.4895	4.4895	4.4895	4.4895	4.4895
ACA1_060260	RFX DNAbinding domain containing protein	5.16615	5.69423	5.6362	4.4895	4.4895	4.4895	4.4895	4.4895	4.4895
ACA1_060280	hypothetical protein	5.41371	5.39251	5.1739	4.4895	4.4895	4.4895	4.4895	4.4895	4.4895
ACA1_060290	Chaperone protein dnaJ, putative	6.18732	4.4895	6.26693	4.4895	4.4895	4.4895	4.4895	4.4895	4.4895
ACA1_060310	hypothetical protein	4.78159	4.4895	5.1739	4.4895	4.4895	4.4895	4.4895	4.4895	4.4895
ACA1_060380	hypothetical protein	7.00365	6.65295	6.26693	4.4895	4.4895	4.4895	4.4895	4.4895	4.4895
ACA1_060390	Kelch motif family protein, putati	5.80916	6.15621	5.98576	4.4895	4.4895	4.4895	4.4895	4.4895	4.4895
ACA1_060470	WD domain, G-beta repeat-containing protein	5.29523	5.01053	5.1739	4.4895	4.4895	4.4895	4.4895	4.4895	4.4895
ACA1_060480	hypothetical protein	5.93336	5.69423	5.6362	4.4895	4.4895	4.4895	4.4895	4.4895	4.4895
ACA1_060500	Actin, putative	4.78159	5.39251	4.4895	4.4895	4.4895	4.4895	4.4895	4.4895	4.4895
ACA1_060530	tetratricopeptide repeat domain containing protein	4.9479	5.39251	4.4895	4.4895	4.4895	4.4895	4.4895	4.4895	4.4895
ACA1_060550	FAD dependent oxidoreductase	5.62494	5.39251	5.6362	4.4895	4.4895	4.4895	4.4895	4.4895	4.4895
ACA1_060570	hypothetical protein	5.29523	5.39251	5.1739	4.4895	4.4895	4.4895	4.4895	4.4895	4.4895
ACA1_060590	short chain dehydrogenase	4.69064	4.4895	4.4895	4.4895	4.4895	4.4895	4.4895	4.4895	4.4895
ACA1_060610	Zinc finger protein	9.37214	9.59775	10.9754	12.2333	11.9447	11.8489	12.0831	10.9899	10.8314
ACA1_060660	Endonuclease/Exonuclease/phosphatase	4.69064	4.4895	5.1739	4.4895	4.4895	4.4895	4.4895	4.4895	4.4895
ACA1_060670	dipeptidase	6.94583	6.15621	5.98576	4.4895	4.4895	4.4895	4.4895	4.4895	4.4895
ACA1_060680	hypothetical protein	4.78159	4.4895	4.4895	4.4895	4.4895	4.4895	4.4895	4.4895	4.4895
ACA1_060690	hypothetical protein	5.02438	4.4895	4.4895	4.4895	4.4895	4.4895	4.4895	4.4895	4.4895
ACA1_060710	alcohol dehydrogenase	4.69064	5.01053	4.4895	4.4895	4.4895	4.4895	4.4895	4.4895	4.4895
ACA1_060960	DnaJ domain containing protein	4.86714	4.4895	4.4895	4.4895	4.4895	4.4895	4.4895	4.4895	4.4895
ACA1_060970	hypothetical protein	5.23214	5.39251	4.4895	4.4895	4.4895	4.4895	4.4895	4.4895	4.4895
ACA1_061020	cytosolic coat protein	5.02438	4.4895	4.4895	4.4895	4.4895	4.4895	4.4895	4.4895	4.4895
ACA1_061060	homocysteine smethyltransferase 1, putative	4.9479	4.4895	5.1739	4.4895	4.4895	4.4895	4.4895	4.4895	4.4895
ACA1_061120	leucine rich repeat domain containing protein	5.62494	5.94363	4.4895	4.4895	4.4895	4.4895	4.4895	4.4895	4.4895
ACA1_061130	GTPaseactivating protein	6.53974	6.78664	5.98576	4.4895	4.4895	4.4895	4.4895	4.4895	4.4895
ACA1_061160	WD repeatcontaining protein	5.02438	4.4895	4.4895	4.4895	4.4895	4.4895	4.4895	4.4895	4.4895
ACA1_061170	hypothetical protein	5.16615	4.4895	4.4895	4.4895	4.4895	4.4895	4.4895	4.4895	4.4895
ACA1_061190	methyltransferase, putat	5.41371	5.01053	5.1739	4.4895	4.4895	4.4895	4.4895	4.4895	4.4895
ACA1_061210	oxidoreductase, putative	5.16615	4.4895	4.4895	4.4895	4.4895	4.4895	4.4895	4.4895	4.4895
ACA1_061280	Ras subfamily protein	5.46948	5.01053	5.6362	4.4895	4.4895	4.4895	4.4895	4.4895	4.4895
ACA1_061290	hypothetical protein	4.59358	4.4895	4.4895	4.4895	4.4895	4.4895	4.4895	4.4895	4.4895
ACA1_061300	RNA recognition motif domain containing protein	5.80916	5.69423	6.26693	4.4895	4.4895	4.4895	4.4895	4.4895	4.4895
ACA1_061340	hypothetical protein	5.16615	5.94363	5.1739	4.4895	4.4895	4.4895	4.4895	4.4895	4.4895
ACA1_061390	FATC domain containing protein	7.5218	7.76742	8.27062	4.4895	4.4895	4.4895	4.4895	6.26343	7.53965
ACA1_061430	hypothetical protein	4.86714	4.4895	4.4895	4.4895	4.4895	4.4895	4.4895	4.4895	4.4895
ACA1_061480	RFX DNAbinding domain containing protein	7.05924	7.22388	6.50213	4.4895	4.4895	4.4895	4.4895	4.4895	4.4895
ACA1_061550	6hydroxy-D-nicotine oxidase	4.86714	4.4895	4.4895	4.4895	4.4895	4.4895	4.4895	4.4895	4.4895
ACA1_061670	patched family protein	6.75702	5.94363	6.26693	4.4895	4.4895	4.4895	4.4895	4.4895	4.4895
ACA1_061680	PH domain containing protein	5.97249	5.69423	5.1739	4.4895	4.4895	4.4895	4.4895	4.4895	4.4895
ACA1_061730	hypothetical protein	4.69064	4.4895	4.4895	4.4895	4.4895	4.4895	4.4895	4.4895	4.4895
ACA1_061770	RabGAP/TBC domain containing protein	5.35569	5.01053	4.4895	4.4895	4.4895	4.4895	4.4895	4.4895	4.4895
ACA1_061780	Serine/threonine kinase	6.0839	4.4895	5.1739	4.4895	4.4895	4.4895	4.4895	4.4895	4.4895
ACA1_061810	peptidase family m1 domain contai	6.75702	5.69423	6.26693	4.4895	4.4895	4.4895	4.4895	4.4895	4.4895
ACA1_061840	hypothetical protein	5.57496	5.39251	6.26693	4.4895	4.4895	4.4895	4.4895	4.4895	4.4895
ACA1_061850	nkyrin repeat and KH domain containing protein	4.78159	4.4895	4.4895	4.4895	4.4895	4.4895	4.4895	4.4895	4.4895
ACA1_061860	Ap4A phosphorylase II, putative	5.46948	5.01053	4.4895	4.4895	4.4895	4.4895	4.4895	4.4895	4.4895
ACA1_061960	hypothetical protein	6.28381	7.31523	7.03949	4.4895	4.4895	4.4895	4.4895	6.26343	4.4895
ACA1_061970	hypothetical protein	5.02438	5.01053	4.4895	4.4895	4.4895	4.4895	4.4895	4.4895	4.4895
ACA1_061980	Fbox domain containing protein	5.93336	5.39251	5.1739	4.4895	4.4895	4.4895	4.4895	4.4895	4.4895
ACA1_062050	chondroitinase B	5.62494	5.39251	4.4895	4.4895	4.4895	4.4895	4.4895	4.4895	4.4895
ACA1_062090	dihydrolipoamide dehydrogenase	5.02438	4.4895	5.6362	4.4895	4.4895	4.4895	4.4895	4.4895	4.4895
ACA1_062160	aminopeptidase p, nterminal domain containing pr	6.96536	6.15621	5.98576	4.4895	4.4895	4.4895	4.4895	4.4895	4.4895
ACA1_062310	HIT zinc finger protein	4.78159	5.01053	4.4895	4.4895	4.4895	4.4895	4.4895	4.4895	4.4895
ACA1_062320	Ubox domain containing protein	4.78159	5.39251	4.4895	4.4895	4.4895	4.4895	4.4895	4.4895	4.4895
ACA1_062330	Sel1 repeat and Ubox domain containing protein	5.16615	4.4895	4.4895	4.4895	4.4895	4.4895	4.4895	4.4895	4.4895
ACA1_062370	ADPribosylation factor subfamily protein	6.8856	6.50559	5.6362	4.4895	4.4895	4.4895	4.4895	4.4895	4.4895
ACA1_062380	hypothetical protein	4.59358	4.4895	4.4895	4.4895	4.4895	4.4895	4.4895	4.4895	4.4895
ACA1_062420	lipase	4.59358	4.4895	4.4895	4.4895	4.4895	4.4895	4.4895	4.4895	4.4895
ACA1_062450	hypothetical protein	5.41371	5.69423	5.1739	4.4895	4.4895	4.4895	4.4895	4.4895	4.4895
ACA1_062480	aspartate-tRNA ligase	11.6202	11.3881	10.9754	10.8295	10.376	10.8576	9.79076	10.0434	10.3786
ACA1_062550	hypothetical protein	5.29523	5.69423	5.6362	4.4895	4.4895	4.4895	4.4895	4.4895	4.4895
ACA1_062610	hypothetical protein	4.69064	4.4895	4.4895	4.4895	4.4895	4.4895	4.4895	4.4895	4.4895
ACA1_062870	premRNA splicing factor PRP38 family protein	5.23214	5.69423	5.98576	4.4895	4.4895	4.4895	4.4895	4.4895	4.4895
ACA1_063040	hypothetical protein	4.78159	4.4895	4.4895	4.4895	4.4895	4.4895	4.4895	4.4895	4.4895
ACA1_063090	hypothetical protein	5.09701	4.4895	4.4895	4.4895	4.4895	4.4895	4.4895	4.4895	4.4895
ACA1_063100	hypothetical protein	5.35569	5.69423	6.26693	4.4895	4.4895	4.4895	4.4895	4.4895	4.4895
ACA1_063140	transporter, major facilitator subfamily protein	5.85176	5.69423	5.98576	4.4895	4.4895	4.4895	4.4895	4.4895	4.4895
ACA1_063160	hypothetical protein	5.02438	4.4895	4.4895	4.4895	4.4895	4.4895	4.4895	4.4895	4.4895
ACA1_063200	hypothetical protein	5.02438	5.01053	4.4895	4.4895	4.4895	4.4895	4.4895	4.4895	4.4895
ACA1_063290	hypothetical protein	5.41371	5.94363	5.1739	4.4895	4.4895	4.4895	4.4895	4.4895	4.4895
ACA1_063450	hypothetical protein	4.69064	4.4895	5.1739	4.4895	4.4895	4.4895	4.4895	4.4895	4.4895
ACA1_063480	AT hook motif domain containing protein	4.78159	5.01053	4.4895	4.4895	4.4895	4.4895	4.4895	4.4895	4.4895
ACA1_063550	cytidine and deoxycytidylate deaminase zincbinding region domain containin	4.86714	4.4895	4.4895	4.4895	4.4895	4.4895	4.4895	4.4895	4.4895
ACA1_063580	hypothetical protein	6.28381	5.69423	5.1739	4.4895	4.4895	4.4895	4.4895	4.4895	4.4895
ACA1_063590	RasGEF domain containing protein	6.15366	6.34145	5.98576	4.4895	4.4895	4.4895	4.4895	4.4895	4.4895
ACA1_063600	zinc knuckle domain containing protein	6.04771	6.34145	5.6362	4.4895	4.4895	4.4895	4.4895	4.4895	4.4895
ACA1_063610	vacuolar protein sorting 55 protein	6.45937	5.39251	5.1739	4.4895	4.4895	4.4895	4.4895	4.4895	4.4895
ACA1_063670	solute carrier family protein	5.23214	5.94363	5.6362	4.4895	4.4895	4.4895	4.4895	4.4895	4.4895
ACA1_063790	hypothetical protein	4.86714	5.01053	5.6362	4.4895	4.4895	4.4895	4.4895	4.4895	4.4895
ACA1_063800	SPRY domain containing protein	5.46948	4.4895	5.1739	4.4895	4.4895	4.4895	4.4895	4.4895	4.4895
ACA1_063810	DHHC zinc finger domain containin	5.80916	5.39251	5.6362	4.4895	4.4895	4.4895	4.4895	4.4895	4.4895
ACA1_063820	hypothetical protein	5.16615	5.01053	5.1739	4.4895	4.4895	4.4895	4.4895	4.4895	4.4895
ACA1_063830	hypothetical protein	5.16615	5.01053	4.4895	4.4895	4.4895	4.4895	4.4895	4.4895	4.4895
ACA1_063880	regulator of chromosome condensation (RCC1) repeat domain containing prote	4.9479	5.01053	4.4895	4.4895	4.4895	4.4895	4.4895	4.4895	4.4895
ACA1_064220	hypothetical protein	5.09701	5.39251	4.4895	4.4895	4.4895	4.4895	4.4895	4.4895	4.4895
ACA1_064250	adaptin subfamily protein	8.26734	8.05929	6.88161	4.4895	4.4895	4.4895	4.4895	4.4895	4.4895
ACA1_064260	hypothetical protein	4.78159	4.4895	4.4895	4.4895	4.4895	4.4895	4.4895	4.4895	4.4895
ACA1_064330	glycolate dehydrogenase	5.23214	5.69423	4.4895	4.4895	4.4895	4.4895	4.4895	4.4895	4.4895
ACA1_064460	ankyrin repeat domain protein	4.69064	4.4895	4.4895	4.4895	4.4895	4.4895	4.4895	4.4895	4.4895
ACA1_064510	small GTPbinding protein domain containing protein	4.69064	4.4895	4.4895	4.4895	4.4895	4.4895	4.4895	4.4895	4.4895
ACA1_064530	TBC domain containing protein	5.46948	5.69423	5.1739	4.4895	4.4895	4.4895	4.4895	4.4895	4.4895
ACA1_064540	hypothetical protein	4.86714	5.01053	5.6362	4.4895	4.4895	4.4895	4.4895	4.4895	4.4895
ACA1_064560	hypothetical protein	4.69064	4.4895	4.4895	4.4895	4.4895	4.4895	4.4895	4.4895	4.4895
ACA1_064690	hypothetical protein	5.76526	5.01053	5.6362	4.4895	4.4895	4.4895	4.4895	4.4895	4.4895
ACA1_064790	hypothetical protein	4.59358	4.4895	4.4895	4.4895	4.4895	4.4895	4.4895	4.4895	4.4895
ACA1_064840	rieske [2fe2s] domain containing protein	5.16615	4.4895	5.1739	4.4895	4.4895	4.4895	4.4895	4.4895	4.4895
ACA1_064950	hypothetical protein	4.78159	4.4895	4.4895	4.4895	4.4895	4.4895	4.4895	4.4895	4.4895
ACA1_064990	hypothetical protein	4.69064	4.4895	5.1739	4.4895	4.4895	4.4895	4.4895	4.4895	4.4895
ACA1_065020	hypothetical protein	5.16615	4.4895	5.6362	4.4895	4.4895	4.4895	4.4895	4.4895	4.4895
ACA1_065110	oligopeptide transporter	5.93336	5.39251	6.26693	4.4895	4.4895	4.4895	4.4895	4.4895	4.4895
ACA1_065130	ammonium transporter, putative	4.9479	5.69423	4.4895	4.4895	4.4895	4.4895	4.4895	4.4895	4.4895
ACA1_065180	hypothetical protein	6.04771	7.12636	6.70431	4.4895	4.4895	4.4895	4.4895	4.4895	4.4895
ACA1_065200	hypothetical protein	5.02438	5.01053	5.1739	4.4895	4.4895	4.4895	4.4895	4.4895	4.4895
ACA1_065220	Fbox domain containing protein	9.10351	7.70123	7.64192	4.4895	4.4895	4.4895	4.4895	6.26343	7.53965
ACA1_065290	GATA zinc finger domain containing protein	4.86714	5.01053	5.1739	4.4895	4.4895	4.4895	4.4895	4.4895	4.4895
ACA1_065400	hypothetical protein	4.59358	4.4895	4.4895	4.4895	4.4895	4.4895	4.4895	4.4895	4.4895
ACA1_065420	hypothetical protein	4.59358	4.4895	4.4895	4.4895	4.4895	4.4895	4.4895	4.4895	4.4895
ACA1_065440	hypothetical protein	4.69064	5.01053	4.4895	4.4895	4.4895	4.4895	4.4895	4.4895	4.4895
ACA1_065460	RhoGAP domain containing protein	6.45937	5.94363	6.26693	4.4895	4.4895	4.4895	4.4895	6.26343	7.53965
ACA1_065480	hypothetical protein	5.02438	4.4895	4.4895	4.4895	4.4895	4.4895	4.4895	4.4895	4.4895
ACA1_065590	hypothetical protein	5.09701	5.01053	4.4895	4.4895	4.4895	4.4895	4.4895	4.4895	4.4895
ACA1_065710	GATA zinc finger domain containing protein	5.35569	4.4895	4.4895	4.4895	4.4895	4.4895	4.4895	4.4895	4.4895
ACA1_065820	BRCA1 domain containing protein	6.51344	6.50559	5.6362	4.4895	4.4895	4.4895	4.4895	4.4895	4.4895
ACA1_065830	hypothetical protein	5.57496	4.4895	4.4895	4.4895	4.4895	4.4895	4.4895	4.4895	4.4895
ACA1_065880	leucine rich repeat domain containing protein	5.71999	4.4895	5.1739	4.4895	4.4895	4.4895	4.4895	4.4895	4.4895
ACA1_065910	hypothetical protein	6.01059	5.39251	5.6362	4.4895	4.4895	4.4895	4.4895	4.4895	4.4895
ACA1_065940	HEAT repeat domain containing protein	7.42637	7.40113	7.03949	4.4895	4.4895	4.4895	4.4895	4.4895	4.4895
ACA1_066530	alfaL-rhamnosidase	4.59358	4.4895	5.1739	4.4895	4.4895	4.4895	4.4895	4.4895	4.4895
ACA1_066570	hypothetical protein	4.69064	4.4895	4.4895	4.4895	4.4895	4.4895	4.4895	4.4895	4.4895
ACA1_066610	hypothetical protein	5.29523	5.01053	5.1739	4.4895	4.4895	4.4895	4.4895	4.4895	4.4895
ACA1_066750	Fbox domain containing protein	5.52318	5.69423	5.1739	4.4895	4.4895	4.4895	4.4895	4.4895	4.4895
ACA1_066840	SNF2 domain containing prote	6.94583	6.90898	6.70431	4.4895	4.4895	4.4895	4.4895	4.4895	4.4895
ACA1_066890	hypothetical protein	5.02438	4.4895	4.4895	4.4895	4.4895	4.4895	4.4895	4.4895	4.4895
ACA1_067480	RasGEF domain containing protein	5.23214	4.4895	5.1739	4.4895	4.4895	4.4895	4.4895	4.4895	4.4895
ACA1_067720	hypothetical protein	4.59358	4.4895	4.4895	4.4895	4.4895	4.4895	4.4895	4.4895	4.4895
ACA1_067850	hypothetical protein	4.78159	5.01053	4.4895	4.4895	4.4895	4.4895	4.4895	4.4895	4.4895
ACA1_067890	transporter, major facilitator subfamily protein	6.43155	5.39251	5.98576	4.4895	4.4895	4.4895	4.4895	4.4895	4.4895
ACA1_067900	WD repeatcontaining protein	6.98463	6.15621	5.6362	4.4895	4.4895	4.4895	4.4895	4.4895	4.4895
ACA1_067970	RhoGAP domain containing protein	5.41371	5.69423	5.98576	4.4895	4.4895	4.4895	4.4895	4.4895	4.4895
ACA1_067980	hypothetical protein	4.59358	4.4895	4.4895	4.4895	4.4895	4.4895	4.4895	4.4895	4.4895
ACA1_068000	hypothetical protein	4.59358	4.4895	4.4895	4.4895	4.4895	4.4895	4.4895	4.4895	4.4895
ACA1_068020	hypothetical protein	5.52318	4.4895	5.6362	4.4895	4.4895	4.4895	4.4895	4.4895	4.4895
ACA1_068060	hypothetical protein	5.67324	5.39251	4.4895	4.4895	4.4895	4.4895	4.4895	4.4895	4.4895
ACA1_068070	small GTPbinding ADP-ribosylation factor	4.69064	4.4895	4.4895	4.4895	4.4895	4.4895	4.4895	4.4895	4.4895
ACA1_068090	WD domain, G-beta repeat-containing protein	7.9422	7.76742	6.70431	4.4895	4.4895	4.4895	4.4895	4.4895	4.4895
ACA1_068220	DNA mismatch repair protein	5.89313	6.34145	5.6362	4.4895	4.4895	4.4895	4.4895	4.4895	4.4895
ACA1_068240	endo-1,4-beta-glucanase, putative	5.57496	5.39251	5.6362	4.4895	4.4895	4.4895	4.4895	4.4895	4.4895
ACA1_068310	hypothetical protein	5.09701	5.01053	5.1739	4.4895	4.4895	4.4895	4.4895	4.4895	4.4895
ACA1_068330	PGAP1 family protein	5.29523	5.01053	5.6362	4.4895	4.4895	4.4895	4.4895	4.4895	4.4895
ACA1_068360	Dual specificity protein kinase	10.6197	9.92223	10.0295	9.27968	10.376	11.2683	10.7724	10.7377	9.97163
ACA1_068390	hypothetical protein	5.09701	4.4895	4.4895	4.4895	4.4895	4.4895	4.4895	4.4895	4.4895
ACA1_068420	HTTM, putative	4.78159	4.4895	4.4895	4.4895	4.4895	4.4895	4.4895	4.4895	4.4895
ACA1_068430	hypothetical protein	5.97249	5.69423	5.1739	4.4895	4.4895	4.4895	4.4895	4.4895	4.4895
ACA1_068440	Fbox domain containing protein	4.9479	4.4895	5.1739	4.4895	4.4895	4.4895	4.4895	4.4895	4.4895
ACA1_068470	protein phosphatase 2C domain containing pr	5.02438	5.39251	5.6362	4.4895	4.4895	4.4895	4.4895	4.4895	4.4895
ACA1_068530	Metallophosphoesterase	7.14737	6.78664	5.98576	4.4895	4.4895	4.4895	4.4895	4.4895	4.4895
ACA1_068560	hypothetical protein	4.69064	5.01053	5.1739	4.4895	4.4895	4.4895	4.4895	4.4895	4.4895
ACA1_068570	hypothetical protein	6.40319	5.94363	5.6362	4.4895	4.4895	4.4895	4.4895	4.4895	4.4895
ACA1_068580	Gprotein alpha subunit	4.69064	5.01053	4.4895	4.4895	4.4895	4.4895	4.4895	4.4895	4.4895
ACA1_068660	Fbox domain containing protein	4.78159	4.4895	4.4895	4.4895	4.4895	4.4895	4.4895	4.4895	4.4895
ACA1_068770	XYPPX repeat-containing protein	5.62494	5.39251	4.4895	4.4895	4.4895	4.4895	4.4895	4.4895	4.4895
ACA1_068840	hypothetical protein	4.69064	5.01053	4.4895	4.4895	4.4895	4.4895	4.4895	4.4895	4.4895
ACA1_068880	WD domain, G-beta repeat-containing protein	5.16615	4.4895	5.1739	4.4895	4.4895	4.4895	4.4895	4.4895	4.4895
ACA1_068910	hypothetical protein	4.59358	4.4895	4.4895	4.4895	4.4895	4.4895	4.4895	4.4895	4.4895
ACA1_068920	WD domain, G-beta repeat-containing protein	4.9479	5.39251	4.4895	4.4895	4.4895	4.4895	4.4895	4.4895	4.4895
ACA1_069020	thioredoxin domain containing protein	4.78159	4.4895	4.4895	4.4895	4.4895	4.4895	4.4895	4.4895	4.4895
ACA1_069070	animal heme peroxidase family protein	6.51344	6.50559	5.6362	4.4895	4.4895	4.4895	4.4895	4.4895	4.4895
ACA1_069090	hypothetical protein	4.86714	4.4895	4.4895	4.4895	4.4895	4.4895	4.4895	4.4895	4.4895
ACA1_069130	phosphoglycerate mutase family domain containing	4.78159	5.01053	4.4895	4.4895	4.4895	4.4895	4.4895	4.4895	4.4895
ACA1_069150	PH domain containing protein	5.67324	5.01053	4.4895	4.4895	4.4895	4.4895	4.4895	4.4895	4.4895
ACA1_069260	hypothetical protein	5.62494	5.94363	5.6362	4.4895	4.4895	4.4895	4.4895	4.4895	4.4895
ACA1_069300	hypothetical protein	4.59358	4.4895	5.1739	4.4895	4.4895	4.4895	4.4895	4.4895	4.4895
ACA1_069450	hypothetical protein	4.9479	4.4895	4.4895	4.4895	4.4895	4.4895	4.4895	4.4895	4.4895
ACA1_069470	hypothetical protein	5.09701	5.39251	4.4895	4.4895	4.4895	4.4895	4.4895	4.4895	4.4895
ACA1_069500	hypothetical protein	4.78159	4.4895	4.4895	4.4895	4.4895	4.4895	4.4895	4.4895	4.4895
ACA1_069510	hypothetical protein	6.04771	5.94363	5.6362	4.4895	4.4895	4.4895	4.4895	4.4895	4.4895
ACA1_069520	ubiquitin specific protease 54 family protein	4.78159	4.4895	4.4895	4.4895	4.4895	4.4895	4.4895	4.4895	4.4895
ACA1_069590	SET and MYND domain containing protein	5.41371	5.69423	4.4895	4.4895	4.4895	4.4895	4.4895	4.4895	4.4895
ACA1_069660	NADH:flavin oxidoreductase/NADH oxidase domain containing protein	5.09701	4.4895	5.1739	4.4895	4.4895	4.4895	4.4895	4.4895	4.4895
ACA1_069670	hypothetical protein	4.59358	4.4895	4.4895	4.4895	4.4895	4.4895	4.4895	4.4895	4.4895
ACA1_069690	0	11.247	11.0653	12.0761	12.2333	13.0557	11.5876	12.3449	12.7914	12.6072
ACA1_069710	serine/threonine kinase	11.296	11.4193	11.9425	12.4025	12.3576	11.2683	12.9278	12.4843	12.6445
ACA1_069770	tyrosine-tRNA ligase	10.3269	10.3362	10.6959	10.8295	11.3638	11.2683	12.5664	11.3912	10.8314
ACA1_069820	chorismate mutase, putative	6.18732	5.39251	5.1739	4.4895	4.4895	4.4895	4.4895	4.4895	4.4895
ACA1_069830	Choline/Carnitine oacyltransferase superf	5.23214	5.39251	5.1739	4.4895	4.4895	4.4895	4.4895	4.4895	4.4895
ACA1_069840	pseudouridine synthase, RluD, putative	5.52318	5.39251	5.1739	4.4895	4.4895	4.4895	4.4895	4.4895	4.4895
ACA1_069860	lipase	5.62494	5.39251	5.6362	4.4895	4.4895	4.4895	4.4895	4.4895	4.4895
ACA1_069930	glycosyl transferase	4.78159	4.4895	4.4895	4.4895	4.4895	4.4895	4.4895	4.4895	4.4895
ACA1_069940	hypothetical protein	5.16615	5.01053	4.4895	4.4895	4.4895	4.4895	4.4895	4.4895	4.4895
ACA1_070010	C2 domain containing protein	5.85176	5.94363	5.1739	4.4895	4.4895	4.4895	4.4895	4.4895	4.4895
ACA1_070180	hypothetical protein	4.59358	4.4895	4.4895	4.4895	4.4895	4.4895	4.4895	4.4895	4.4895
ACA1_070360	glyoxalase, putative	5.52318	5.39251	4.4895	4.4895	4.4895	4.4895	4.4895	4.4895	4.4895
ACA1_070380	RhoGEF domain containing protein	6.04771	5.94363	5.6362	4.4895	4.4895	4.4895	4.4895	6.26343	4.4895
ACA1_070420	helicase associated domain containing protein	5.02438	5.01053	5.1739	4.4895	4.4895	4.4895	4.4895	4.4895	4.4895
ACA1_070450	hypothetical protein	5.41371	5.01053	5.1739	4.4895	4.4895	4.4895	4.4895	4.4895	4.4895
ACA1_070590	hypothetical protein	6.25236	5.39251	5.6362	4.4895	4.4895	4.4895	4.4895	4.4895	4.4895
ACA1_070660	hypothetical protein	4.9479	4.4895	5.1739	4.4895	4.4895	4.4895	4.4895	4.4895	4.4895
ACA1_070810	hypothetical protein	4.9479	4.4895	4.4895	4.4895	4.4895	4.4895	4.4895	4.4895	4.4895
ACA1_070820	hypothetical protein	5.29523	4.4895	5.1739	4.4895	4.4895	4.4895	4.4895	4.4895	4.4895
ACA1_070830	acety	10.0782	10.4106	11.0881	10.2534	11.3638	10.8576	11.3511	10.5412	10.1894
ACA1_070900	hypothetical protein	5.35569	4.4895	4.4895	4.4895	4.4895	4.4895	4.4895	4.4895	4.4895
ACA1_070920	tRNA(N1G37) methyltransferase	6.86495	7.12636	5.98576	4.4895	4.4895	4.4895	4.4895	4.4895	4.4895
ACA1_070970	BTB/POZ domain containing protein	5.57496	6.15621	5.98576	4.4895	4.4895	4.4895	4.4895	4.4895	4.4895
ACA1_071060	hypothetical protein	4.86714	4.4895	4.4895	4.4895	4.4895	4.4895	4.4895	4.4895	4.4895
ACA1_071070	cruciform DNA binding protein, putative	4.59358	4.4895	4.4895	4.4895	4.4895	4.4895	4.4895	4.4895	4.4895
ACA1_071120	low CO2induced aldose reductase	5.52318	5.39251	5.1739	4.4895	4.4895	4.4895	4.4895	4.4895	4.4895
ACA1_071130	hypothetical protein	4.69064	5.01053	4.4895	4.4895	4.4895	4.4895	4.4895	4.4895	4.4895
ACA1_071180	hypothetical protein	4.69064	5.01053	4.4895	4.4895	4.4895	4.4895	4.4895	4.4895	4.4895
ACA1_071230	tRNA dimethylallyltransferase	4.69064	4.4895	4.4895	4.4895	4.4895	4.4895	4.4895	4.4895	4.4895
ACA1_071280	adaptor complexes medium subunit family protein	5.85176	6.34145	5.6362	4.4895	4.4895	4.4895	4.4895	4.4895	4.4895
ACA1_071350	GTPbinding ADP-ribosylation factor Arf1, putative	4.59358	4.4895	4.4895	4.4895	4.4895	4.4895	4.4895	4.4895	4.4895
ACA1_071370	hypothetical protein	4.59358	4.4895	4.4895	4.4895	4.4895	4.4895	4.4895	4.4895	4.4895
ACA1_071410	hypothetical protein	5.71999	5.39251	5.6362	4.4895	4.4895	4.4895	4.4895	4.4895	4.4895
ACA1_071460	leucine rich repeat domain containing protein	5.02438	5.39251	4.4895	4.4895	4.4895	4.4895	4.4895	4.4895	4.4895
ACA1_071710	0	5.57496	5.01053	4.4895	4.4895	4.4895	4.4895	4.4895	4.4895	4.4895
ACA1_071730	hypothetical protein	6.94583	6.50559	5.6362	4.4895	4.4895	4.4895	4.4895	4.4895	4.4895
ACA1_071760	carrier superfamily protein	5.09701	4.4895	5.1739	4.4895	4.4895	4.4895	4.4895	4.4895	4.4895
ACA1_071770	dual specificity phosphatase, catalytic domain containing protein	7.18118	5.94363	5.98576	4.4895	4.4895	4.4895	4.4895	4.4895	4.4895
ACA1_071780	Adenylate kinase	5.23214	4.4895	4.4895	4.4895	4.4895	4.4895	4.4895	4.4895	4.4895
ACA1_071800	pentatricopeptide repeat domain containing protein	5.62494	5.94363	4.4895	4.4895	4.4895	4.4895	4.4895	4.4895	4.4895
ACA1_071830	Beige/BEACH domain containing prote	8.96485	9.15392	9.403	9.27968	9.40022	11.2683	9.79076	9.51	9.97163
ACA1_071860	GATA zinc finger domain containing protein	5.02438	4.4895	5.1739	4.4895	4.4895	4.4895	4.4895	4.4895	4.4895
ACA1_071870	HEAT repeat domain containing protein	7.0773	6.90898	6.26693	4.4895	4.4895	4.4895	4.4895	4.4895	4.4895
ACA1_072020	leucinerich repeat kinase	5.02438	4.4895	5.6362	4.4895	4.4895	4.4895	4.4895	4.4895	4.4895
ACA1_072130	hypothetical protein	6.96536	6.50559	6.50213	4.4895	4.4895	4.4895	4.4895	4.4895	4.4895
ACA1_072140	Ras family protein rasG, putative	4.78159	4.4895	4.4895	4.4895	4.4895	4.4895	4.4895	4.4895	4.4895
ACA1_072160	SET domain containing protein	6.73444	6.15621	6.26693	4.4895	4.4895	4.4895	4.4895	4.4895	4.4895
ACA1_072200	RNA recognition motif domain containing prot	5.46948	4.4895	4.4895	4.4895	4.4895	4.4895	4.4895	4.4895	4.4895
ACA1_072240	hypothetical protein	4.86714	4.4895	4.4895	4.4895	4.4895	4.4895	4.4895	4.4895	4.4895
ACA1_072250	hypothetical protein	4.78159	4.4895	4.4895	4.4895	4.4895	4.4895	4.4895	4.4895	4.4895
ACA1_072370	leucine rich repeat domain containing protein	5.23214	5.69423	4.4895	4.4895	4.4895	4.4895	4.4895	4.4895	4.4895
ACA1_072480	hypothetical protein	4.69064	4.4895	4.4895	4.4895	4.4895	4.4895	4.4895	4.4895	4.4895
ACA1_072490	CBS domain containing pr	5.29523	5.01053	5.6362	4.4895	4.4895	4.4895	4.4895	4.4895	4.4895
ACA1_072520	hypothetical protein	4.69064	4.4895	5.1739	4.4895	4.4895	4.4895	4.4895	4.4895	4.4895
ACA1_072630	alkylated dna repair pr	5.85176	5.39251	5.1739	4.4895	4.4895	4.4895	4.4895	4.4895	4.4895
ACA1_072690	signal peptide peptidase	5.46948	4.4895	4.4895	4.4895	4.4895	4.4895	4.4895	4.4895	4.4895
ACA1_072710	ABC transporter, ATPbinding domain containing protein	6.15366	7.02176	6.26693	4.4895	4.4895	4.4895	4.4895	4.4895	4.4895
ACA1_072740	BTB/POZ domain containing protein	6.45937	6.34145	4.4895	4.4895	4.4895	4.4895	4.4895	4.4895	4.4895
ACA1_072770	transporter, major facilitator subfamily protein	5.16615	5.39251	4.4895	4.4895	4.4895	4.4895	4.4895	4.4895	4.4895
ACA1_072780	hypothetical protein	6.18732	5.69423	5.98576	4.4895	4.4895	4.4895	4.4895	4.4895	4.4895
ACA1_072800	methionine-tRNA ligase	6.04771	5.39251	5.98576	4.4895	4.4895	4.4895	4.4895	4.4895	4.4895
ACA1_072860	phosphatidate cytidylyltransferase	4.78159	5.01053	5.1739	4.4895	4.4895	4.4895	4.4895	4.4895	4.4895
ACA1_072880	hypothetical protein	4.9479	5.01053	5.1739	4.4895	4.4895	4.4895	4.4895	4.4895	4.4895
ACA1_072900	RhoGAP domain containing protein	4.69064	4.4895	4.4895	4.4895	4.4895	4.4895	4.4895	4.4895	4.4895
ACA1_072960	hypothetical protein	5.35569	4.4895	5.98576	4.4895	4.4895	4.4895	4.4895	4.4895	4.4895
ACA1_073000	Mis12 domain containing protein	5.89313	5.94363	5.1739	4.4895	4.4895	4.4895	4.4895	4.4895	4.4895
ACA1_073010	Fbox domain containing protein	5.62494	5.01053	5.6362	4.4895	4.4895	4.4895	4.4895	4.4895	4.4895
ACA1_073040	WD domain, G-beta repeat-containing protein	7.2142	6.50559	6.50213	4.4895	4.4895	4.4895	4.4895	6.26343	4.4895
ACA1_073090	WD domain, G-beta repeat-containing protein	5.09701	4.4895	5.1739	4.4895	4.4895	4.4895	4.4895	4.4895	4.4895
ACA1_073100	homeobox domain containing protein	5.57496	5.01053	5.6362	4.4895	4.4895	4.4895	4.4895	4.4895	4.4895
ACA1_073110	hypothetical protein	5.09701	5.01053	5.1739	4.4895	4.4895	4.4895	4.4895	4.4895	4.4895
ACA1_073250	hypothetical protein	5.35569	5.01053	5.1739	4.4895	4.4895	4.4895	4.4895	4.4895	4.4895
ACA1_073470	SH3 domain containing protein	5.09701	5.01053	4.4895	4.4895	4.4895	4.4895	4.4895	4.4895	4.4895
ACA1_073480	hypothetical protein	5.35569	5.69423	5.1739	4.4895	4.4895	4.4895	4.4895	4.4895	4.4895
ACA1_073710	EGFlike domain containing protein	4.59358	4.4895	4.4895	4.4895	4.4895	4.4895	4.4895	4.4895	4.4895
ACA1_074130	Acyltransferase	5.97249	5.94363	5.1739	4.4895	4.4895	4.4895	4.4895	4.4895	4.4895
ACA1_074400	hypothetical protein	5.85176	5.01053	4.4895	4.4895	4.4895	4.4895	4.4895	4.4895	4.4895
ACA1_074430	hypothetical protein	4.69064	4.4895	4.4895	4.4895	4.4895	4.4895	4.4895	4.4895	4.4895
ACA1_074440	RFX DNAbinding domain containing protein	4.78159	5.01053	4.4895	4.4895	4.4895	4.4895	4.4895	4.4895	4.4895
ACA1_074470	chromatin associated protein kti12	5.09701	4.4895	5.1739	4.4895	4.4895	4.4895	4.4895	4.4895	4.4895
ACA1_074480	hypothetical protein	4.59358	4.4895	4.4895	4.4895	4.4895	4.4895	4.4895	4.4895	4.4895
ACA1_074530	Endonuclease/exonuclease/phosphatase family protein	4.69064	4.4895	4.4895	4.4895	4.4895	4.4895	4.4895	4.4895	4.4895
ACA1_074670	arginase	6.43155	6.50559	5.6362	4.4895	4.4895	4.4895	4.4895	4.4895	4.4895
ACA1_074790	hypothetical protein	6.37426	5.69423	5.1739	4.4895	4.4895	4.4895	4.4895	4.4895	4.4895
ACA1_074820	hypothetical protein	5.62494	5.94363	4.4895	4.4895	4.4895	4.4895	4.4895	4.4895	4.4895
ACA1_074850	hypothetical protein	4.69064	4.4895	4.4895	4.4895	4.4895	4.4895	4.4895	4.4895	4.4895
ACA1_074860	dual specificity phosphatase, catalytic domain containing protein	4.86714	5.01053	4.4895	4.4895	4.4895	4.4895	4.4895	4.4895	4.4895
ACA1_074890	hypothetical protein	5.71999	5.01053	5.1739	4.4895	4.4895	4.4895	4.4895	4.4895	4.4895
ACA1_074900	E3 SUMOprotein ligase NSE2, putative	5.67324	5.94363	5.1739	4.4895	4.4895	4.4895	4.4895	4.4895	4.4895
ACA1_075190	hypothetical protein	4.69064	4.4895	4.4895	4.4895	4.4895	4.4895	4.4895	4.4895	4.4895
ACA1_075290	rRNA pseudouridine synthas	13.589	13.125	13.0069	11.24	11.3638	11.2683	10.7724	11.3316	11.1755
ACA1_075310	hypothetical protein	4.69064	4.4895	4.4895	4.4895	4.4895	4.4895	4.4895	4.4895	4.4895
ACA1_075320	hypothetical protein	5.02438	4.4895	4.4895	4.4895	4.4895	4.4895	4.4895	4.4895	4.4895
ACA1_075370	amine oxidase, flavincontaining superfamily protein	5.93336	6.78664	6.26693	4.4895	4.4895	4.4895	4.4895	4.4895	4.4895
ACA1_075390	Yip1 domain containing protein	4.69064	4.4895	4.4895	4.4895	4.4895	4.4895	4.4895	4.4895	4.4895
ACA1_076080	leucine rich repeat domain containing protein	4.69064	4.4895	4.4895	4.4895	4.4895	4.4895	4.4895	4.4895	4.4895
ACA1_076180	polyubiquitin, putative	12.4584	12.5157	12.7485	11.8205	10.9529	9.30718	10.7724	8.83708	9.40272
ACA1_076250	hypothetical protein	4.78159	4.4895	5.6362	4.4895	4.4895	4.4895	4.4895	4.4895	4.4895
ACA1_076390	GAF domain containing serine/threonine kinase	7.02242	6.34145	7.5399	4.4895	4.4895	4.4895	4.4895	7.03539	4.4895
ACA1_076430	hypothetical protein	4.78159	4.4895	4.4895	4.4895	4.4895	4.4895	4.4895	4.4895	4.4895
ACA1_076700	hypothetical protein	4.69064	4.4895	4.4895	4.4895	4.4895	4.4895	4.4895	4.4895	4.4895
ACA1_076710	hypothetical protein	4.59358	4.4895	4.4895	4.4895	4.4895	4.4895	4.4895	4.4895	4.4895
ACA1_076720	Fbox domain containing protein	5.23214	4.4895	4.4895	4.4895	4.4895	4.4895	4.4895	4.4895	4.4895
ACA1_076910	hypothetical protein	4.59358	4.4895	4.4895	4.4895	4.4895	4.4895	4.4895	4.4895	4.4895
ACA1_076960	hypothetical protein	5.67324	5.39251	5.1739	4.4895	4.4895	4.4895	4.4895	4.4895	4.4895
ACA1_077020	propionate-CoA synthetase and ligase	6.0839	5.69423	5.6362	4.4895	4.4895	4.4895	4.4895	4.4895	4.4895
ACA1_077060	hypothetical protein	4.69064	4.4895	5.1739	4.4895	4.4895	4.4895	4.4895	4.4895	4.4895
ACA1_077150	hypothetical protein	5.35569	5.39251	5.1739	4.4895	4.4895	4.4895	4.4895	4.4895	4.4895
ACA1_077190	hypothetical protein	5.29523	5.69423	5.6362	4.4895	4.4895	4.4895	4.4895	4.4895	4.4895
ACA1_077210	hypothetical protein	5.71999	5.69423	5.1739	4.4895	4.4895	4.4895	4.4895	4.4895	4.4895
ACA1_077270	zinc finger domain containing protein	5.57496	5.39251	5.1739	4.4895	4.4895	4.4895	4.4895	4.4895	4.4895
ACA1_077280	CBS domain containing pr	5.62494	5.39251	5.1739	4.4895	4.4895	4.4895	4.4895	4.4895	4.4895
ACA1_077300	serine/threonine kinase	6.51344	5.69423	7.31128	4.4895	4.4895	4.4895	4.4895	6.26343	4.4895
ACA1_077510	hypothetical protein	4.59358	4.4895	5.1739	4.4895	4.4895	4.4895	4.4895	4.4895	4.4895
ACA1_077780	SAM domain (Sterile alpha motif) domain containing protein	4.78159	4.4895	4.4895	4.4895	4.4895	4.4895	4.4895	4.4895	4.4895
ACA1_077820	helicase conserved Cterminal domain containing pr	4.69064	4.4895	4.4895	4.4895	4.4895	4.4895	4.4895	4.4895	4.4895
ACA1_077860	hypothetical protein	4.86714	4.4895	4.4895	4.4895	4.4895	4.4895	4.4895	4.4895	4.4895
ACA1_077870	hypothetical protein	4.59358	4.4895	5.1739	4.4895	4.4895	4.4895	4.4895	4.4895	4.4895
ACA1_077930	glutathione Stransferase	5.02438	4.4895	4.4895	4.4895	4.4895	4.4895	4.4895	4.4895	4.4895
ACA1_077960	phospholipase	5.02438	4.4895	4.4895	4.4895	4.4895	4.4895	4.4895	4.4895	4.4895
ACA1_078060	FYVE zinc finger domain containing protein	6.64037	6.78664	6.88161	4.4895	4.4895	4.4895	4.4895	4.4895	4.4895
ACA1_078080	Ankyrin repeat containing protein	4.9479	5.01053	4.4895	4.4895	4.4895	4.4895	4.4895	4.4895	4.4895
ACA1_078200	uracil phosporibosyltransferase	4.59358	4.4895	4.4895	4.4895	4.4895	4.4895	4.4895	4.4895	4.4895
ACA1_078580	hypothetical protein	5.76526	5.69423	4.4895	4.4895	4.4895	4.4895	4.4895	4.4895	4.4895
ACA1_078600	0	7.04094	6.90898	5.98576	4.4895	4.4895	4.4895	4.4895	4.4895	4.4895
ACA1_078610	hypothetical protein	4.9479	5.39251	4.4895	4.4895	4.4895	4.4895	4.4895	4.4895	4.4895
ACA1_078890	histidine kinase	4.78159	5.01053	4.4895	4.4895	4.4895	4.4895	4.4895	4.4895	4.4895
ACA1_078910	hypothetical protein	5.41371	5.94363	5.1739	4.4895	4.4895	4.4895	4.4895	4.4895	4.4895
ACA1_078950	fattyacid-CoA ligase	4.86714	4.4895	4.4895	4.4895	4.4895	4.4895	4.4895	4.4895	4.4895
ACA1_079010	Glycoprotein, synaptic 2 family	11.6544	11.4599	11.6375	10.2534	11.6833	10.2814	9.79076	8.20091	9.40272
ACA1_079030	acetyltransferase	5.16615	5.39251	5.1739	4.4895	4.4895	4.4895	4.4895	4.4895	4.4895
ACA1_080290	hypothetical protein	4.9479	4.4895	5.6362	4.4895	4.4895	4.4895	4.4895	4.4895	4.4895
ACA1_080410	radial spoke head 10 B family protein, putative	5.09701	5.94363	5.6362	4.4895	4.4895	4.4895	4.4895	4.4895	4.4895
ACA1_080550	FAD binding domain containing protei	6.71149	6.65295	5.98576	4.4895	4.4895	4.4895	4.4895	4.4895	4.4895
ACA1_080650	Fbox domain containing protein	5.85176	6.15621	5.98576	4.4895	4.4895	4.4895	4.4895	4.4895	4.4895
ACA1_081580	Nacetylglucosaminyl	4.78159	4.4895	4.4895	4.4895	4.4895	4.4895	4.4895	4.4895	4.4895
ACA1_082190	hypothetical protein	4.9479	5.39251	4.4895	4.4895	4.4895	4.4895	4.4895	4.4895	4.4895
ACA1_082200	hypothetical protein	5.46948	5.01053	5.6362	4.4895	4.4895	4.4895	4.4895	4.4895	4.4895
ACA1_082740	hypothetical protein	5.67324	5.01053	5.6362	4.4895	4.4895	4.4895	4.4895	4.4895	4.4895
ACA1_083200	BNR/Aspbox repeat domain containing protein	5.29523	5.01053	4.4895	4.4895	4.4895	4.4895	4.4895	4.4895	4.4895
ACA1_083430	multi-sensor hybrid histidine kinase	4.78159	4.4895	4.4895	4.4895	4.4895	4.4895	4.4895	4.4895	4.4895
ACA1_083640	elongation factor 1alpha	5.41371	5.39251	5.6362	4.4895	4.4895	4.4895	4.4895	4.4895	4.4895
ACA1_083780	ankyrin repeat-containing protein	4.59358	4.4895	4.4895	4.4895	4.4895	4.4895	4.4895	4.4895	4.4895
ACA1_083890	hypothetical protein	4.69064	5.01053	4.4895	4.4895	4.4895	4.4895	4.4895	4.4895	4.4895
ACA1_084260	hypothetical protein	5.71999	5.01053	4.4895	4.4895	4.4895	4.4895	4.4895	4.4895	4.4895
ACA1_084380	NHL repeat containing protein	4.59358	4.4895	4.4895	4.4895	4.4895	4.4895	4.4895	4.4895	4.4895
ACA1_084820	RhoGEF domain containing protein	5.46948	5.39251	5.1739	4.4895	4.4895	4.4895	4.4895	4.4895	4.4895
ACA1_084860	myosin head (motor domain) domain containing protein	5.57496	5.39251	5.6362	4.4895	4.4895	4.4895	4.4895	6.26343	4.4895
ACA1_084880	transcriptional regulator, Sir2 family protein	5.52318	4.4895	5.6362	4.4895	4.4895	4.4895	4.4895	4.4895	4.4895
ACA1_085220	hypothetical protein	4.78159	4.4895	4.4895	4.4895	4.4895	4.4895	4.4895	4.4895	4.4895
ACA1_085240	hypothetical protein	4.59358	4.4895	4.4895	4.4895	4.4895	4.4895	4.4895	4.4895	4.4895
ACA1_085280	hypothetical protein	4.59358	4.4895	4.4895	4.4895	4.4895	4.4895	4.4895	4.4895	4.4895
ACA1_085820	SNF1related protein kinase	4.69064	4.4895	4.4895	4.4895	4.4895	4.4895	4.4895	4.4895	4.4895
ACA1_085940	protease	4.86714	5.01053	4.4895	4.4895	4.4895	4.4895	4.4895	4.4895	4.4895
ACA1_085950	formylCoA transferase	4.86714	5.01053	4.4895	4.4895	4.4895	4.4895	4.4895	4.4895	4.4895
ACA1_086070	serine/threonine kinase	4.78159	5.01053	4.4895	4.4895	4.4895	4.4895	4.4895	4.4895	4.4895
ACA1_086530	hypothetical protein	4.86714	5.01053	5.6362	4.4895	4.4895	4.4895	4.4895	4.4895	4.4895
ACA1_086640	Channel-conduc	4.69064	4.4895	4.4895	4.4895	4.4895	4.4895	4.4895	4.4895	4.4895
ACA1_086750	ABC transporte	4.86714	4.4895	4.4895	4.4895	4.4895	4.4895	4.4895	4.4895	4.4895
ACA1_087070	hypothetical protein	5.29523	5.39251	5.6362	4.4895	4.4895	4.4895	4.4895	4.4895	4.4895
ACA1_087180	hypothetical protein	4.59358	4.4895	4.4895	4.4895	4.4895	4.4895	4.4895	4.4895	4.4895
ACA1_087190	hypothetical protein	4.69064	4.4895	4.4895	4.4895	4.4895	4.4895	4.4895	4.4895	4.4895
ACA1_087310	Ras subfamily protein	4.59358	4.4895	4.4895	4.4895	4.4895	4.4895	4.4895	4.4895	4.4895
ACA1_087320	hypothetical protein	4.9479	4.4895	4.4895	4.4895	4.4895	4.4895	4.4895	4.4895	4.4895
ACA1_087360	MIF4G domain containing protein	6.59093	5.39251	5.6362	4.4895	4.4895	4.4895	4.4895	4.4895	4.4895
ACA1_087380	Ras subfamily protein	4.78159	5.01053	4.4895	4.4895	4.4895	4.4895	4.4895	4.4895	4.4895
ACA1_087410	ankyrin repeat-containing protein	4.59358	4.4895	4.4895	4.4895	4.4895	4.4895	4.4895	4.4895	4.4895
ACA1_087470	hypothetical protein	4.86714	5.01053	4.4895	4.4895	4.4895	4.4895	4.4895	4.4895	4.4895
ACA1_087500	peroxidase	4.69064	5.01053	5.6362	4.4895	4.4895	4.4895	4.4895	4.4895	4.4895
ACA1_087510	protein kinase domain containing protein	5.41371	5.01053	4.4895	4.4895	4.4895	4.4895	4.4895	4.4895	4.4895
ACA1_087520	diacylglycerol kinase	5.85176	6.15621	5.6362	4.4895	4.4895	4.4895	4.4895	4.4895	4.4895
ACA1_087550	hypothetical protein	4.69064	5.01053	4.4895	4.4895	4.4895	4.4895	4.4895	4.4895	4.4895
ACA1_087610	phospholipase D, putative	6.53974	6.65295	7.03949	4.4895	4.4895	4.4895	4.4895	6.26343	4.4895
ACA1_088210	lightdependent protochlorophyllide reducta	4.69064	4.4895	5.6362	4.4895	4.4895	4.4895	4.4895	4.4895	4.4895
ACA1_088330	hypothetical protein	4.69064	4.4895	4.4895	4.4895	4.4895	4.4895	4.4895	4.4895	4.4895
ACA1_088580	hypothetical protein	5.46948	5.39251	5.98576	4.4895	4.4895	4.4895	4.4895	4.4895	4.4895
ACA1_088590	scavenger mrna decapping enzyme (dcps) protein	6.28381	5.94363	4.4895	4.4895	4.4895	4.4895	4.4895	4.4895	4.4895
ACA1_088620	aldo/keto reductase family oxidoreductase	5.89313	5.01053	5.1739	4.4895	4.4895	4.4895	4.4895	4.4895	4.4895
ACA1_088690	RhoGEF domain containing protein	5.80916	5.39251	5.98576	4.4895	4.4895	4.4895	4.4895	4.4895	4.4895
ACA1_088740	Ubox domain containing protein	6.18732	5.94363	5.6362	4.4895	4.4895	4.4895	4.4895	4.4895	4.4895
ACA1_088810	ABC transporter, ATPbinding domain containing protein	5.29523	5.39251	5.6362	4.4895	4.4895	4.4895	4.4895	4.4895	4.4895
ACA1_088820	nicotinamide nucleot	5.67324	6.34145	6.26693	4.4895	4.4895	4.4895	4.4895	4.4895	4.4895
ACA1_088830	isochorismatase family superfamily protein	5.89313	5.01053	5.6362	4.4895	4.4895	4.4895	4.4895	4.4895	4.4895
ACA1_088860	leucine rich repeat domain containing	5.57496	5.69423	6.26693	4.4895	4.4895	4.4895	4.4895	4.4895	4.4895
ACA1_088940	hypothetical protein	5.62494	5.01053	5.1739	4.4895	4.4895	4.4895	4.4895	4.4895	4.4895
ACA1_089060	hypothetical protein	7.23044	6.15621	5.98576	4.4895	4.4895	4.4895	4.4895	4.4895	4.4895
ACA1_089070	hypothetical protein	5.16615	4.4895	4.4895	4.4895	4.4895	4.4895	4.4895	4.4895	4.4895
ACA1_089080	malate/Llactate dehydrogenase	4.69064	4.4895	4.4895	4.4895	4.4895	4.4895	4.4895	4.4895	4.4895
ACA1_089090	regulator of g protein signaling domain containing protein	5.23214	4.4895	4.4895	4.4895	4.4895	4.4895	4.4895	4.4895	4.4895
ACA1_089110	cupin domain containing protein	4.78159	4.4895	4.4895	4.4895	4.4895	4.4895	4.4895	4.4895	4.4895
ACA1_089130	betalactamase	5.71999	5.69423	5.1739	4.4895	4.4895	4.4895	4.4895	4.4895	4.4895
ACA1_089200	hypothetical protein	5.23214	4.4895	4.4895	4.4895	4.4895	4.4895	4.4895	4.4895	4.4895
ACA1_089210	Ras subfamily protein	5.67324	5.69423	5.1739	4.4895	4.4895	4.4895	4.4895	4.4895	4.4895
ACA1_089310	hypothetical protein	5.57496	5.94363	5.6362	4.4895	4.4895	4.4895	4.4895	4.4895	4.4895
ACA1_089440	NBARC domain containing protein	4.78159	4.4895	5.1739	4.4895	4.4895	4.4895	4.4895	4.4895	4.4895
ACA1_089650	NACHT domain containing protein	4.59358	4.4895	5.1739	4.4895	4.4895	4.4895	4.4895	4.4895	4.4895
ACA1_089830	non-specific protein-tyrosine kinase	4.69064	5.01053	5.1739	4.4895	4.4895	4.4895	4.4895	4.4895	4.4895
ACA1_089850	bromodomain	6.77927	6.34145	5.6362	4.4895	4.4895	4.4895	4.4895	4.4895	4.4895
ACA1_090000	hypothetical protein	5.09701	4.4895	4.4895	4.4895	4.4895	4.4895	4.4895	4.4895	4.4895
ACA1_090010	hypothetical protein	4.9479	5.01053	5.6362	4.4895	4.4895	4.4895	4.4895	4.4895	4.4895
ACA1_090050	hypothetical protein	5.02438	4.4895	4.4895	4.4895	4.4895	4.4895	4.4895	4.4895	4.4895
ACA1_090080	endonuclease/exonuclease/phosphatase family protein	5.35569	5.01053	5.1739	4.4895	4.4895	4.4895	4.4895	4.4895	4.4895
ACA1_090090	elongation factor Tu GTP bind	10.007	10.0474	9.80602	10.2534	11.3638	10.2814	9.79076	10.691	9.97163
ACA1_090140	hypothetical protein	5.41371	5.01053	5.1739	4.4895	4.4895	4.4895	4.4895	4.4895	4.4895
ACA1_090150	hypothetical protein	4.69064	4.4895	5.6362	4.4895	4.4895	4.4895	4.4895	4.4895	4.4895
ACA1_090160	hypothetical protein	4.69064	4.4895	4.4895	4.4895	4.4895	4.4895	4.4895	4.4895	4.4895
ACA1_090170	Ras subfamily protein	5.52318	4.4895	5.1739	4.4895	4.4895	4.4895	4.4895	4.4895	4.4895
ACA1_090270	hypothetical protein	5.29523	5.69423	4.4895	4.4895	4.4895	4.4895	4.4895	4.4895	4.4895
ACA1_090290	hypothetical protein	5.93336	5.69423	5.6362	4.4895	4.4895	4.4895	4.4895	4.4895	4.4895
ACA1_091310	spindle pole body interacting protein	5.71999	5.94363	5.98576	4.4895	4.4895	4.4895	4.4895	4.4895	4.4895
ACA1_091360	hypothetical protein	4.59358	4.4895	5.1739	4.4895	4.4895	4.4895	4.4895	4.4895	4.4895
ACA1_091370	hypothetical protein	5.29523	4.4895	4.4895	4.4895	4.4895	4.4895	4.4895	4.4895	4.4895
ACA1_091430	Znfinger in Ran binding protein and others domain containing protein	5.93336	6.50559	5.98576	4.4895	4.4895	4.4895	4.4895	6.26343	4.4895
ACA1_091500	RSNARE, VAMP72-family	5.29523	4.4895	4.4895	4.4895	4.4895	4.4895	4.4895	4.4895	4.4895
ACA1_091510	hypothetical protein	4.59358	4.4895	4.4895	4.4895	4.4895	4.4895	4.4895	4.4895	4.4895
ACA1_091520	hypothetical protein	5.46948	5.69423	5.6362	4.4895	4.4895	4.4895	4.4895	4.4895	4.4895
ACA1_091550	Fbox domain containing protein	6.8856	7.31523	6.50213	4.4895	4.4895	4.4895	4.4895	4.4895	4.4895
ACA1_091590	Myblike DNA-binding domain containing protein	4.9479	4.4895	4.4895	4.4895	4.4895	4.4895	4.4895	4.4895	4.4895
ACA1_091610	hypothetical protein	4.9479	4.4895	4.4895	4.4895	4.4895	4.4895	4.4895	4.4895	4.4895
ACA1_091740	RhoGEF domain containing protein	6.34474	5.94363	5.98576	4.4895	4.4895	4.4895	4.4895	4.4895	4.4895
ACA1_091800	hypothetical protein	4.86714	4.4895	5.1739	4.4895	4.4895	4.4895	4.4895	4.4895	4.4895
ACA1_091830	Ras subfamily Rab protein	5.35569	5.01053	5.6362	4.4895	4.4895	4.4895	4.4895	4.4895	4.4895
ACA1_091990	Hras1 protein	4.59358	4.4895	4.4895	4.4895	4.4895	4.4895	4.4895	4.4895	4.4895
ACA1_092020	hypothetical protein	4.86714	5.01053	4.4895	4.4895	4.4895	4.4895	4.4895	4.4895	4.4895
ACA1_092060	serine/threonine k	4.69064	4.4895	5.1739	4.4895	4.4895	4.4895	4.4895	4.4895	4.4895
ACA1_092100	Znfinger domain containing protein	6.844	6.15621	5.6362	4.4895	4.4895	4.4895	4.4895	4.4895	4.4895
ACA1_092110	hypothetical protein	5.89313	6.50559	5.6362	4.4895	4.4895	4.4895	4.4895	4.4895	4.4895
ACA1_092120	Fbox domain containing protein	4.69064	5.01053	5.1739	4.4895	4.4895	4.4895	4.4895	4.4895	4.4895
ACA1_092150	hypothetical protein	4.78159	4.4895	4.4895	4.4895	4.4895	4.4895	4.4895	4.4895	4.4895
ACA1_092160	xylose isomerase domain containing protein	5.57496	5.39251	5.6362	4.4895	4.4895	4.4895	4.4895	4.4895	4.4895
ACA1_092200	hypothetical protein	4.9479	5.01053	4.4895	4.4895	4.4895	4.4895	4.4895	4.4895	4.4895
ACA1_092350	hypothetical protein	5.16615	5.01053	4.4895	4.4895	4.4895	4.4895	4.4895	4.4895	4.4895
ACA1_092370	telomerase reverse transcriptase	5.09701	5.01053	5.1739	4.4895	4.4895	4.4895	4.4895	4.4895	4.4895
ACA1_092380	hypothetical protein	5.09701	4.4895	5.6362	4.4895	4.4895	4.4895	4.4895	4.4895	4.4895
ACA1_092410	oxidoreductase, 2nitropropane dioxygenase	5.41371	4.4895	5.1739	4.4895	4.4895	4.4895	4.4895	4.4895	4.4895
ACA1_092460	hypothetical protein	5.02438	4.4895	4.4895	4.4895	4.4895	4.4895	4.4895	4.4895	4.4895
ACA1_092580	hypothetical protein	5.35569	5.01053	4.4895	4.4895	4.4895	4.4895	4.4895	4.4895	4.4895
ACA1_092620	hypothetical protein	5.71999	5.01053	5.6362	4.4895	4.4895	4.4895	4.4895	4.4895	4.4895
ACA1_092630	hypothetical protein	5.02438	4.4895	4.4895	4.4895	4.4895	4.4895	4.4895	4.4895	4.4895
ACA1_092670	hypothetical protein	6.43155	5.94363	5.6362	4.4895	4.4895	4.4895	4.4895	4.4895	4.4895
ACA1_092700	hypothetical protein	4.9479	4.4895	4.4895	4.4895	4.4895	4.4895	4.4895	4.4895	4.4895
ACA1_092710	Arf GTPase activating protein	5.16615	4.4895	5.1739	4.4895	4.4895	4.4895	4.4895	4.4895	4.4895
ACA1_092730	Fbox domain containing protein	5.23214	5.01053	5.1739	4.4895	4.4895	4.4895	4.4895	4.4895	4.4895
ACA1_092930	MYND finger domain containing protein	5.29523	4.4895	6.26693	4.4895	4.4895	4.4895	4.4895	4.4895	4.4895
ACA1_092950	Poly(ADPribose) polymerase	4.69064	4.4895	4.4895	4.4895	4.4895	4.4895	4.4895	4.4895	4.4895
ACA1_092980	serine/threonine kinase	6.61586	6.34145	5.6362	4.4895	4.4895	4.4895	4.4895	4.4895	4.4895
ACA1_092990	zinc knuckle domain containing protein	4.59358	4.4895	5.1739	4.4895	4.4895	4.4895	4.4895	4.4895	4.4895
ACA1_093000	hypothetical protein	4.59358	4.4895	4.4895	4.4895	4.4895	4.4895	4.4895	4.4895	4.4895
ACA1_093020	cell division cycle protein, putative	5.71999	5.69423	6.26693	4.4895	4.4895	4.4895	4.4895	4.4895	4.4895
ACA1_093030	dynamin domain containing protein	7.35413	6.65295	6.26693	4.4895	4.4895	4.4895	4.4895	4.4895	4.4895
ACA1_093070	hypothetical protein	4.86714	4.4895	4.4895	4.4895	4.4895	4.4895	4.4895	4.4895	4.4895
ACA1_093080	hypothetical protein	4.9479	4.4895	4.4895	4.4895	4.4895	4.4895	4.4895	4.4895	4.4895
ACA1_093090	hypothetical protein	5.02438	4.4895	5.1739	4.4895	4.4895	4.4895	4.4895	4.4895	4.4895
ACA1_093110	hypothetical protein	5.16615	4.4895	5.1739	4.4895	4.4895	4.4895	4.4895	4.4895	4.4895
ACA1_093310	hypothetical protein	5.46948	5.01053	4.4895	4.4895	4.4895	4.4895	4.4895	4.4895	4.4895
ACA1_093330	Ras subfamily protein	4.9479	5.39251	4.4895	4.4895	4.4895	4.4895	4.4895	4.4895	4.4895
ACA1_093390	hypothetical protein	6.92603	5.94363	5.6362	4.4895	4.4895	4.4895	4.4895	4.4895	4.4895
ACA1_093410	helicase conserved Cterminal domain containing protein	5.71999	4.4895	5.98576	4.4895	4.4895	4.4895	4.4895	6.26343	4.4895
ACA1_093420	hypothetical protein	5.93336	5.69423	5.98576	4.4895	4.4895	4.4895	4.4895	4.4895	4.4895
ACA1_093450	Tubulin/FtsZ family, GTPase domain containing protein	4.78159	4.4895	4.4895	4.4895	4.4895	4.4895	4.4895	4.4895	4.4895
ACA1_093470	ADPribosylation factor subfamily protein	5.02438	5.01053	5.1739	4.4895	4.4895	4.4895	4.4895	4.4895	4.4895
ACA1_093480	helicase associated domain containing protein	6.34474	5.39251	5.1739	4.4895	4.4895	4.4895	4.4895	4.4895	4.4895
ACA1_093520	serine/threonine kinase	4.78159	4.4895	5.1739	4.4895	4.4895	4.4895	4.4895	4.4895	4.4895
ACA1_093570	hypothetical protein	5.16615	5.39251	5.6362	4.4895	4.4895	4.4895	4.4895	4.4895	4.4895
ACA1_093640	regulator of chromosome condensation (RCC1) repeat domain containing prote	4.86714	4.4895	4.4895	4.4895	4.4895	4.4895	4.4895	4.4895	4.4895
ACA1_093720	signal recognition particledock	11.2248	11.117	11.9868	12.9312	13.2616	14.0643	13.457	13.8165	14.7981
ACA1_094040	hypothetical protein	6.01059	5.94363	5.6362	4.4895	4.4895	4.4895	4.4895	4.4895	4.4895
ACA1_094090	C2 domain containing protein	4.59358	4.4895	4.4895	4.4895	4.4895	4.4895	4.4895	4.4895	4.4895
ACA1_094120	EF hand domain containing protein	4.59358	4.4895	4.4895	4.4895	4.4895	4.4895	4.4895	4.4895	4.4895
ACA1_094130	hypothetical protein	6.22021	5.94363	5.1739	4.4895	4.4895	4.4895	4.4895	4.4895	4.4895
ACA1_094150	hypothetical protein	4.59358	4.4895	4.4895	4.4895	4.4895	4.4895	4.4895	4.4895	4.4895
ACA1_094160	hypothetical protein	4.59358	4.4895	4.4895	4.4895	4.4895	4.4895	4.4895	4.4895	4.4895
ACA1_094210	transporter, auxin efflux carrier family protein	5.57496	5.01053	5.1739	4.4895	4.4895	4.4895	4.4895	4.4895	4.4895
ACA1_094510	hypothetical protein	5.16615	5.01053	4.4895	4.4895	4.4895	4.4895	4.4895	4.4895	4.4895
ACA1_094520	hypothetical protein	7.62364	6.90898	6.88161	4.4895	4.4895	4.4895	4.4895	4.4895	4.4895
ACA1_094560	Pep3/Vps18/deep orange family prote	6.28381	6.90898	6.70431	4.4895	4.4895	4.4895	4.4895	4.4895	4.4895
ACA1_094900	hypothetical protein	5.41371	4.4895	5.98576	4.4895	4.4895	4.4895	4.4895	4.4895	4.4895
ACA1_095070	hypothetical protein	5.57496	6.50559	5.6362	4.4895	4.4895	4.4895	4.4895	4.4895	4.4895
ACA1_095110	hypothetical protein	5.09701	5.39251	5.1739	4.4895	4.4895	4.4895	4.4895	4.4895	4.4895
ACA1_095240	RNA recognition motif domain containing prote	9.00315	9.10356	10.1727	9.27968	10.376	11.5876	10.7724	8.65452	8.44982
ACA1_095290	biotin-acetyl-CoA-carboxylase ligase	4.9479	4.4895	4.4895	4.4895	4.4895	4.4895	4.4895	4.4895	4.4895
ACA1_095420	hypothetical protein	5.02438	5.39251	4.4895	4.4895	4.4895	4.4895	4.4895	4.4895	4.4895
ACA1_095620	hypothetical protein	5.41371	5.69423	5.1739	4.4895	4.4895	4.4895	4.4895	4.4895	4.4895
ACA1_095630	phosphoethanolamin	5.41371	5.01053	5.6362	4.4895	4.4895	4.4895	4.4895	6.26343	4.4895
ACA1_095700	hypothetical protein	5.71999	5.01053	5.6362	4.4895	4.4895	4.4895	4.4895	4.4895	4.4895
ACA1_095730	Fbox domain containing protein	4.69064	4.4895	5.1739	4.4895	4.4895	4.4895	4.4895	4.4895	4.4895
ACA1_095770	transporter,	4.69064	5.01053	5.1739	4.4895	4.4895	4.4895	4.4895	4.4895	4.4895
ACA1_095780	disrupted in	5.52318	5.69423	5.1739	4.4895	4.4895	4.4895	4.4895	4.4895	4.4895
ACA1_095920	hypothetical protein	4.86714	4.4895	4.4895	4.4895	4.4895	4.4895	4.4895	4.4895	4.4895
ACA1_095940	hypothetical protein	5.23214	4.4895	5.1739	4.4895	4.4895	4.4895	4.4895	4.4895	4.4895
ACA1_096150	RhoGEF domain containing protein	5.76526	5.94363	5.1739	4.4895	4.4895	4.4895	4.4895	4.4895	4.4895
ACA1_096170	hypothetical protein	6.01059	5.39251	4.4895	4.4895	4.4895	4.4895	4.4895	4.4895	4.4895
ACA1_096230	transcriptional regulator, putative	5.89313	6.65295	6.26693	4.4895	4.4895	4.4895	4.4895	4.4895	4.4895
ACA1_096260	polysaccharide lyase	4.86714	4.4895	4.4895	4.4895	4.4895	4.4895	4.4895	4.4895	4.4895
ACA1_096280	hypothetical protein	4.86714	4.4895	4.4895	4.4895	4.4895	4.4895	4.4895	4.4895	4.4895
ACA1_096450	hypothetical protein	5.09701	5.01053	4.4895	4.4895	4.4895	4.4895	4.4895	4.4895	4.4895
ACA1_096540	pentatricopeptide repeat domain containing protein	6.18732	6.15621	5.98576	4.4895	4.4895	4.4895	4.4895	4.4895	4.4895
ACA1_096630	Ras GTPase activation domain containing protein	6.75702	7.12636	6.70431	4.4895	4.4895	4.4895	4.4895	4.4895	4.4895
ACA1_096640	hypothetical protein	4.69064	4.4895	4.4895	4.4895	4.4895	4.4895	4.4895	4.4895	4.4895
ACA1_096650	polyubiquitin, putative	11.1296	10.5859	11.1061	11.24	11.6833	10.8576	10.7724	11.8394	12.2675
ACA1_096670	aldo/keto reductase	5.09701	5.01053	5.1739	4.4895	4.4895	4.4895	4.4895	4.4895	4.4895
ACA1_096720	FYVE zinc finger domain containing protein	5.02438	5.01053	4.4895	4.4895	4.4895	4.4895	4.4895	4.4895	4.4895
ACA1_096800	hypothetical protein	5.29523	5.39251	4.4895	4.4895	4.4895	4.4895	4.4895	4.4895	4.4895
ACA1_096830	FKBP12rapamycin complex-associa	10.2393	10.3791	10.7766	11.24	10.376	11.8489	11.7631	10.8268	10.6956
ACA1_097040	hypothetical protein	5.57496	6.15621	5.98576	4.4895	4.4895	4.4895	4.4895	4.4895	4.4895
ACA1_097060	hypothetical protein	4.59358	4.4895	4.4895	4.4895	4.4895	4.4895	4.4895	4.4895	4.4895
ACA1_097100	alkaline phosphatase D, putative	7.00365	6.34145	6.26693	4.4895	4.4895	4.4895	4.4895	4.4895	4.4895
ACA1_097110	tRNA nucleotidyltransferase/poly(A) polymerase	6.01059	5.69423	6.26693	4.4895	4.4895	4.4895	4.4895	4.4895	4.4895
ACA1_097120	DHHA1 domain containing protein	4.9479	4.4895	5.1739	4.4895	4.4895	4.4895	4.4895	4.4895	4.4895
ACA1_097190	phospholipase	5.02438	4.4895	4.4895	4.4895	4.4895	4.4895	4.4895	4.4895	4.4895
ACA1_097220	UBX domain containing protein	4.78159	4.4895	4.4895	4.4895	4.4895	4.4895	4.4895	4.4895	4.4895
ACA1_097260	serine/threonine kinase	5.52318	5.69423	6.26693	4.4895	4.4895	4.4895	4.4895	6.26343	4.4895
ACA1_097370	Ras subfamily protein	4.59358	4.4895	4.4895	4.4895	4.4895	4.4895	4.4895	4.4895	4.4895
ACA1_097380	hypothetical protein	5.57496	5.01053	5.1739	4.4895	4.4895	4.4895	4.4895	4.4895	4.4895
ACA1_097400	betaphosphoglucomutase family hydrolase	5.71999	5.01053	5.6362	4.4895	4.4895	4.4895	4.4895	4.4895	4.4895
ACA1_097420	NADbinding domain 4 domain containing protein	5.23214	4.4895	5.1739	4.4895	4.4895	4.4895	4.4895	4.4895	4.4895
ACA1_097430	acylCoA binding protein, putative	5.76526	6.15621	5.6362	4.4895	4.4895	4.4895	4.4895	4.4895	4.4895
ACA1_097480	hypothetical protein	4.69064	5.01053	4.4895	4.4895	4.4895	4.4895	4.4895	4.4895	4.4895
ACA1_097590	amine oxidase, flavincontaining superfamily protein	10.8287	11.0387	10.4225	11.5593	10.9529	9.30718	10.7724	10.0434	10.5458
ACA1_097600	peroxidase	12.001	12.0807	12.4546	10.8295	11.3638	12.5823	13.3418	12.9681	13.0018
ACA1_097620	hypothetical protein	5.41371	5.39251	6.26693	4.4895	4.4895	4.4895	4.4895	4.4895	4.4895
ACA1_097730	protein phosphatase 2C domain containing protein	5.29523	5.39251	4.4895	4.4895	4.4895	4.4895	4.4895	4.4895	4.4895
ACA1_097830	LIM domain containing protein	6.15366	5.69423	5.98576	4.4895	4.4895	4.4895	4.4895	4.4895	4.4895
ACA1_098040	phospholipidtranslocating P-type ATP	5.97249	6.34145	5.6362	4.4895	4.4895	4.4895	4.4895	6.26343	4.4895
ACA1_098060	ribosomal L40e family	14.3812	14.4655	15.8584	14.5499	12.9405	13.2584	12.0831	11.2695	10.3786
ACA1_098130	oxidoreductase, short chain	5.23214	4.4895	5.1739	4.4895	4.4895	4.4895	4.4895	4.4895	4.4895
ACA1_098220	hypothetical protein	5.52318	5.69423	5.6362	4.4895	4.4895	4.4895	4.4895	4.4895	4.4895
ACA1_098230	leucine rich repeat domain containing protein	4.86714	4.4895	4.4895	4.4895	4.4895	4.4895	4.4895	4.4895	4.4895
ACA1_098250	WD domain, G-beta repeat-containing protein	5.16615	5.39251	4.4895	4.4895	4.4895	4.4895	4.4895	4.4895	4.4895
ACA1_098260	Mannosyl oligosaccharide gluco	7.54794	6.90898	5.98576	4.4895	4.4895	4.4895	4.4895	4.4895	4.4895
ACA1_098270	Prokumamolisin, activation domain containing	5.02438	5.01053	5.98576	4.4895	4.4895	4.4895	4.4895	4.4895	4.4895
ACA1_098450	oxidoreductase, short chain dehydrogenase/reductase superfamily protein	4.59358	4.4895	4.4895	4.4895	4.4895	4.4895	4.4895	4.4895	4.4895
ACA1_098680	transporter, major intrinsic protein (MIP) superfamily protein	4.69064	4.4895	4.4895	4.4895	4.4895	4.4895	4.4895	4.4895	4.4895
ACA1_098810	SYS1 integral membrane protein, putative	5.02438	5.01053	4.4895	4.4895	4.4895	4.4895	4.4895	4.4895	4.4895
ACA1_098840	hypothetical protein	5.85176	5.69423	5.1739	4.4895	4.4895	4.4895	4.4895	4.4895	4.4895
ACA1_098860	hypothetical protein	6.56556	6.50559	5.6362	4.4895	4.4895	4.4895	4.4895	6.26343	4.4895
ACA1_098890	hypothetical protein	4.69064	5.01053	4.4895	4.4895	4.4895	4.4895	4.4895	4.4895	4.4895
ACA1_098960	Histone-lysine N-methyltransferase	5.29523	5.69423	5.6362	4.4895	4.4895	4.4895	4.4895	4.4895	4.4895
ACA1_098970	hypothetical protein	4.9479	4.4895	4.4895	4.4895	4.4895	4.4895	4.4895	4.4895	4.4895
ACA1_098990	hypothetical protein	5.23214	4.4895	4.4895	4.4895	4.4895	4.4895	4.4895	4.4895	4.4895
ACA1_099480	methenyltetrahydrofolate cyclohydrolase	4.9479	5.39251	4.4895	4.4895	4.4895	4.4895	4.4895	4.4895	4.4895
ACA1_099960	diaminopimelate epimerase	4.69064	5.01053	4.4895	4.4895	4.4895	4.4895	4.4895	4.4895	4.4895
ACA1_099980	NmrA family protein	4.69064	4.4895	4.4895	4.4895	4.4895	4.4895	4.4895	4.4895	4.4895
ACA1_100050	DRAP deaminase	5.02438	4.4895	4.4895	4.4895	4.4895	4.4895	4.4895	4.4895	4.4895
ACA1_100080	NAD-dependent epimerase/dehydratase family protein	11.4224	11.3454	10.6959	11.5593	11.3638	11.2683	10.7724	10.5412	10.5458
ACA1_100160	hypothetical protein	5.09701	4.4895	4.4895	4.4895	4.4895	4.4895	4.4895	4.4895	4.4895
ACA1_100410	SAP domain containing protein	5.41371	5.69423	5.1739	4.4895	4.4895	4.4895	4.4895	6.26343	4.4895
ACA1_100430	IMP2 inner mitochond	4.86714	5.01053	4.4895	4.4895	4.4895	4.4895	4.4895	4.4895	4.4895
ACA1_100480	Fbox/LRR-repeat protein	5.02438	5.01053	4.4895	4.4895	4.4895	4.4895	4.4895	4.4895	4.4895
ACA1_100550	hypothetical protein	4.69064	4.4895	4.4895	4.4895	4.4895	4.4895	4.4895	4.4895	4.4895
ACA1_100560	hypothetical protein	6.04771	5.94363	5.6362	4.4895	4.4895	4.4895	4.4895	4.4895	4.4895
ACA1_100630	hypothetical protein	5.02438	5.01053	4.4895	4.4895	4.4895	4.4895	4.4895	4.4895	4.4895
ACA1_100910	sensory transduction histidine kinase, putative	5.35569	4.4895	4.4895	4.4895	4.4895	4.4895	4.4895	4.4895	4.4895
ACA1_100930	DNA topoisomerase	7.33923	6.50559	6.50213	4.4895	4.4895	4.4895	4.4895	6.26343	4.4895
ACA1_101060	inosineuridine preferring nucleoside hydrolase family protein	10.5241	10.595	9.43177	9.27968	10.376	10.2814	9.79076	8.83708	10.6956
ACA1_101350	hypothetical protein	4.86714	5.39251	5.1739	4.4895	4.4895	4.4895	4.4895	4.4895	4.4895
ACA1_101410	hypothetical protein	4.69064	5.01053	4.4895	4.4895	4.4895	4.4895	4.4895	4.4895	4.4895
ACA1_101420	copine subfamily protein	5.35569	5.39251	5.1739	4.4895	4.4895	4.4895	4.4895	4.4895	4.4895
ACA1_101570	hypothetical protein	5.16615	5.39251	4.4895	4.4895	4.4895	4.4895	4.4895	4.4895	4.4895
ACA1_102100	hypothetical protein	4.78159	4.4895	4.4895	4.4895	4.4895	4.4895	4.4895	4.4895	4.4895
ACA1_102890	hypothetical protein	4.69064	4.4895	4.4895	4.4895	4.4895	4.4895	4.4895	4.4895	4.4895
ACA1_103150	hypothetical protein	5.35569	5.01053	4.4895	4.4895	4.4895	4.4895	4.4895	4.4895	4.4895
ACA1_103350	hypothetical protein	5.23214	5.01053	5.6362	4.4895	4.4895	4.4895	4.4895	4.4895	4.4895
ACA1_103380	RhoGEF domain containing protein	4.9479	4.4895	4.4895	4.4895	4.4895	4.4895	4.4895	4.4895	4.4895
ACA1_103640	peroxidase	5.76526	5.69423	5.1739	4.4895	4.4895	4.4895	4.4895	4.4895	4.4895
ACA1_103860	phorbol esters/diacylglycerol bin	4.69064	4.4895	5.1739	4.4895	4.4895	4.4895	4.4895	4.4895	4.4895
ACA1_103870	villin headpiece domain containing protein	5.09701	5.01053	4.4895	4.4895	4.4895	4.4895	4.4895	4.4895	4.4895
ACA1_103880	hypothetical protein	4.9479	4.4895	5.1739	4.4895	4.4895	4.4895	4.4895	4.4895	4.4895
ACA1_104240	hypothetical protein	5.23214	5.39251	5.1739	4.4895	4.4895	4.4895	4.4895	4.4895	4.4895
ACA1_104670	Aldehyde dehydrogenase, putative	4.59358	4.4895	4.4895	4.4895	4.4895	4.4895	4.4895	4.4895	4.4895
ACA1_105030	hypothetical protein	4.59358	4.4895	4.4895	4.4895	4.4895	4.4895	4.4895	4.4895	4.4895
ACA1_105260	hypothetical protein	4.59358	4.4895	4.4895	4.4895	4.4895	4.4895	4.4895	4.4895	4.4895
ACA1_105630	hypothetical protein	5.35569	5.01053	5.6362	4.4895	4.4895	4.4895	4.4895	4.4895	4.4895
ACA1_105940	ARID/BRIGHT DNA binding domain containing protein	5.93336	5.39251	6.50213	4.4895	4.4895	4.4895	4.4895	4.4895	4.4895
ACA1_105980	hypothetical protein	4.59358	4.4895	4.4895	4.4895	4.4895	4.4895	4.4895	4.4895	4.4895
ACA1_106140	hypothetical protein	4.69064	4.4895	4.4895	4.4895	4.4895	4.4895	4.4895	4.4895	4.4895
ACA1_106270	cation efflux family superfamily protein	5.16615	5.69423	5.1739	4.4895	4.4895	4.4895	4.4895	4.4895	4.4895
ACA1_106320	hypothetical protein	5.35569	6.15621	5.98576	4.4895	4.4895	4.4895	4.4895	4.4895	4.4895
ACA1_106350	Fbox domain containing protein	5.29523	5.01053	4.4895	4.4895	4.4895	4.4895	4.4895	4.4895	4.4895
ACA1_106380	hypothetical protein	4.69064	4.4895	5.1739	4.4895	4.4895	4.4895	4.4895	4.4895	4.4895
ACA1_106950	PH domain co	5.85176	5.39251	4.4895	4.4895	4.4895	4.4895	4.4895	4.4895	4.4895
ACA1_107420	RhoGEF domain containing protein	5.93336	5.94363	6.88161	4.4895	4.4895	4.4895	4.4895	6.26343	4.4895
ACA1_107430	RhoGEF domain containing protein	6.3146	6.15621	5.98576	4.4895	4.4895	4.4895	4.4895	4.4895	4.4895
ACA1_107530	Zn-finger in ubiquitin-h	5.41371	5.94363	5.1739	4.4895	4.4895	4.4895	4.4895	4.4895	4.4895
ACA1_107560	hypothetical protein	4.59358	4.4895	4.4895	4.4895	4.4895	4.4895	4.4895	4.4895	4.4895
ACA1_107650	hypothetical protein	4.78159	5.01053	4.4895	4.4895	4.4895	4.4895	4.4895	4.4895	4.4895
ACA1_107870	UBA/TSN domain containing protein	4.86714	5.01053	4.4895	4.4895	4.4895	4.4895	4.4895	4.4895	4.4895
ACA1_108090	hypothetical protein	4.78159	4.4895	4.4895	4.4895	4.4895	4.4895	4.4895	4.4895	4.4895
ACA1_108200	hypothetical protein	5.02438	5.01053	5.6362	4.4895	4.4895	4.4895	4.4895	4.4895	4.4895
ACA1_108220	hypothetical protein	4.86714	4.4895	4.4895	4.4895	4.4895	4.4895	4.4895	4.4895	4.4895
ACA1_108240	START domain containing protein	5.29523	5.69423	5.1739	4.4895	4.4895	4.4895	4.4895	4.4895	4.4895
ACA1_108530	EF hand domain containing protein	5.09701	5.01053	5.1739	4.4895	4.4895	4.4895	4.4895	4.4895	4.4895
ACA1_108600	myosin head (motor domain) domain containing protein	5.57496	5.39251	5.98576	4.4895	4.4895	4.4895	4.4895	4.4895	4.4895
ACA1_108610	MyTH4 domain containing protein	5.16615	4.4895	5.1739	4.4895	4.4895	4.4895	4.4895	4.4895	4.4895
ACA1_108770	pyridine nucleotidedisulfide oxidoreductase domain con	5.29523	5.01053	5.6362	4.4895	4.4895	4.4895	4.4895	4.4895	4.4895
ACA1_108800	CBS domain containing pr	5.67324	6.65295	5.6362	4.4895	4.4895	4.4895	4.4895	4.4895	4.4895
ACA1_109110	pyridine nucleotidedisulfide oxidoreductase family pro	5.46948	4.4895	4.4895	4.4895	4.4895	4.4895	4.4895	4.4895	4.4895
ACA1_109120	hypothetical protein	11.8595	10.9345	12.1644	10.2534	11.3638	11.5876	12.0831	12.1638	12.4473
ACA1_109140	kelch repeat-containing protein	5.29523	5.01053	5.1739	4.4895	4.4895	4.4895	4.4895	4.4895	4.4895
ACA1_109760	hypothetical protein	5.02438	5.39251	4.4895	4.4895	4.4895	4.4895	4.4895	4.4895	4.4895
ACA1_110040	galactosyltransferase	5.46948	4.4895	4.4895	4.4895	4.4895	4.4895	4.4895	4.4895	4.4895
ACA1_110100	protein kinase	6.73444	6.34145	6.50213	4.4895	4.4895	4.4895	4.4895	4.4895	4.4895
ACA1_110280	cysteine-tRNA ligase	6.77927	6.65295	5.98576	4.4895	4.4895	4.4895	4.4895	4.4895	4.4895
ACA1_110340	hypothetical protein	5.46948	5.01053	5.1739	4.4895	4.4895	4.4895	4.4895	4.4895	4.4895
ACA1_110440	malate/Llactate dehydrogenase	6.1192	5.39251	5.6362	4.4895	4.4895	4.4895	4.4895	4.4895	4.4895
ACA1_110460	hypothetical protein	4.78159	4.4895	4.4895	4.4895	4.4895	4.4895	4.4895	4.4895	4.4895
ACA1_110490	methyltransferase	5.09701	5.69423	4.4895	4.4895	4.4895	4.4895	4.4895	4.4895	4.4895
ACA1_110520	Bbox zinc finger domain conta	4.78159	4.4895	4.4895	4.4895	4.4895	4.4895	4.4895	4.4895	4.4895
ACA1_110910	HEAT repeat-containing protein	5.23214	5.01053	5.6362	4.4895	4.4895	4.4895	4.4895	4.4895	4.4895
ACA1_111050	hypothetical protein	4.86714	4.4895	4.4895	4.4895	4.4895	4.4895	4.4895	4.4895	4.4895
ACA1_111100	hypothetical protein	5.46948	5.01053	5.1739	4.4895	4.4895	4.4895	4.4895	4.4895	4.4895
ACA1_111700	K+ channel tetramerisation subfamily prote	5.09701	5.01053	5.6362	4.4895	4.4895	4.4895	4.4895	4.4895	4.4895
ACA1_111970	sulfiredoxin 1	4.59358	4.4895	5.1739	4.4895	4.4895	4.4895	4.4895	4.4895	4.4895
ACA1_112040	hypothetical protein	5.23214	5.69423	5.1739	4.4895	4.4895	4.4895	4.4895	4.4895	4.4895
ACA1_112070	DnaJ	5.35569	4.4895	5.1739	4.4895	4.4895	4.4895	4.4895	4.4895	4.4895
ACA1_112110	glycosyl transferase	4.78159	5.01053	5.6362	4.4895	4.4895	4.4895	4.4895	4.4895	4.4895
ACA1_112120	hypothetical protein	4.69064	4.4895	4.4895	4.4895	4.4895	4.4895	4.4895	4.4895	4.4895
ACA1_112430	Casein kinase I	4.69064	4.4895	5.1739	4.4895	4.4895	4.4895	4.4895	4.4895	4.4895
ACA1_112480	Fbox domain containing protein	4.9479	4.4895	4.4895	4.4895	4.4895	4.4895	4.4895	4.4895	4.4895
ACA1_112500	TBC domain containing protein	5.52318	4.4895	4.4895	4.4895	4.4895	4.4895	4.4895	4.4895	4.4895
ACA1_112570	myosin light chain kinase	5.89313	4.4895	6.26693	4.4895	4.4895	4.4895	4.4895	4.4895	4.4895
ACA1_112590	WH2 motif domain containing protein	5.02438	4.4895	4.4895	4.4895	4.4895	4.4895	4.4895	4.4895	4.4895
ACA1_112640	MBOAT family protein	6.71149	5.69423	5.1739	4.4895	4.4895	4.4895	4.4895	4.4895	4.4895
ACA1_112660	K+ channel tetramerisation domain containing protein	6.01059	5.39251	5.1739	4.4895	4.4895	4.4895	4.4895	4.4895	4.4895
ACA1_112780	hypothetical protein	4.9479	5.01053	4.4895	4.4895	4.4895	4.4895	4.4895	4.4895	4.4895
ACA1_112890	Sphingosine1-phosphate lyase, putat	6.48666	5.94363	5.6362	4.4895	4.4895	4.4895	4.4895	4.4895	4.4895
ACA1_112920	base excision DNA repair protein, H	6.04771	6.50559	5.98576	4.4895	4.4895	4.4895	4.4895	4.4895	4.4895
ACA1_112930	hypothetical protein	4.9479	4.4895	4.4895	4.4895	4.4895	4.4895	4.4895	4.4895	4.4895
ACA1_112950	RasGEF domain containing protein	6.73444	5.69423	6.50213	4.4895	4.4895	4.4895	4.4895	6.26343	4.4895
ACA1_113190	hypothetical protein	4.86714	5.39251	4.4895	4.4895	4.4895	4.4895	4.4895	4.4895	4.4895
ACA1_113420	hypothetical protein	4.59358	4.4895	4.4895	4.4895	4.4895	4.4895	4.4895	4.4895	4.4895
ACA1_113430	hypothetical protein	5.41371	5.01053	4.4895	4.4895	4.4895	4.4895	4.4895	4.4895	4.4895
ACA1_113460	leucine rich repeat domain containing p	5.97249	5.39251	6.26693	4.4895	4.4895	4.4895	4.4895	4.4895	4.4895
ACA1_113500	hypothetical protein	4.86714	5.01053	4.4895	4.4895	4.4895	4.4895	4.4895	4.4895	4.4895
ACA1_113510	Adaptin domain containing protein	5.46948	5.01053	5.98576	4.4895	4.4895	4.4895	4.4895	4.4895	4.4895
ACA1_113590	Inositol-hexakisphosphate kinase	6.15366	5.69423	5.98576	4.4895	4.4895	4.4895	4.4895	4.4895	4.4895
ACA1_113620	divergent AAA domain containing protein	5.62494	5.69423	5.98576	4.4895	4.4895	4.4895	4.4895	4.4895	4.4895
ACA1_113670	hypothetical protein	5.85176	6.34145	5.98576	4.4895	4.4895	4.4895	4.4895	4.4895	4.4895
ACA1_113740	Fbox domain containing protein	4.59358	4.4895	4.4895	4.4895	4.4895	4.4895	4.4895	4.4895	4.4895
ACA1_113840	dual specificity ph	5.35569	5.39251	5.1739	4.4895	4.4895	4.4895	4.4895	4.4895	4.4895
ACA1_114110	hypothetical protein	4.78159	5.39251	5.6362	4.4895	4.4895	4.4895	4.4895	4.4895	4.4895
ACA1_114130	hypothetical protein	4.78159	4.4895	4.4895	4.4895	4.4895	4.4895	4.4895	4.4895	4.4895
ACA1_114420	hypothetical protein	5.67324	5.01053	5.1739	4.4895	4.4895	4.4895	4.4895	4.4895	4.4895
ACA1_114470	C2 domain containing protein	5.41371	5.01053	5.6362	4.4895	4.4895	4.4895	4.4895	6.26343	4.4895
ACA1_114480	hypothetical protein	6.90596	5.69423	5.98576	4.4895	4.4895	4.4895	4.4895	4.4895	4.4895
ACA1_114800	glucokinase regulator, putative	6.15366	6.34145	5.6362	4.4895	4.4895	4.4895	4.4895	4.4895	4.4895
ACA1_114820	glucosylceramidase	5.23214	5.01053	5.98576	4.4895	4.4895	4.4895	4.4895	4.4895	4.4895
ACA1_114850	SAM domain (Sterile alpha motif) domain containing protein	6.90596	6.50559	7.03949	4.4895	4.4895	4.4895	4.4895	6.26343	4.4895
ACA1_114860	Ankyrin repeat containing protein	5.71999	5.94363	4.4895	4.4895	4.4895	4.4895	4.4895	4.4895	4.4895
ACA1_114910	C2 domain containing protein	5.46948	5.94363	5.1739	4.4895	4.4895	4.4895	4.4895	4.4895	4.4895
ACA1_115040	hypothetical protein	5.85176	5.94363	5.1739	4.4895	4.4895	4.4895	4.4895	4.4895	4.4895
ACA1_115200	hypothetical protein	5.76526	5.39251	4.4895	4.4895	4.4895	4.4895	4.4895	4.4895	4.4895
ACA1_115210	hypothetical protein	5.02438	5.01053	4.4895	4.4895	4.4895	4.4895	4.4895	4.4895	4.4895
ACA1_115220	hypothetical protein	4.59358	4.4895	4.4895	4.4895	4.4895	4.4895	4.4895	4.4895	4.4895
ACA1_115230	hypothetical protein	6.77927	5.69423	6.50213	4.4895	4.4895	4.4895	4.4895	4.4895	4.4895
ACA1_115390	cysteine proteinase	5.02438	4.4895	4.4895	4.4895	4.4895	4.4895	4.4895	4.4895	4.4895
ACA1_115540	hypothetical protein	6.1192	5.69423	5.1739	4.4895	4.4895	4.4895	4.4895	4.4895	4.4895
ACA1_115660	hypothetical protein	5.23214	5.01053	5.1739	4.4895	4.4895	4.4895	4.4895	4.4895	4.4895
ACA1_115730	hypothetical protein	4.86714	5.01053	5.1739	4.4895	4.4895	4.4895	4.4895	4.4895	4.4895
ACA1_115770	tRNA modification GTPase TrmE, putative	5.71999	5.94363	6.26693	4.4895	4.4895	4.4895	4.4895	4.4895	4.4895
ACA1_115870	hypothetical protein	5.62494	5.01053	4.4895	4.4895	4.4895	4.4895	4.4895	4.4895	4.4895
ACA1_115880	NADbinding domain 4 domain containing protein	4.9479	4.4895	5.1739	4.4895	4.4895	4.4895	4.4895	4.4895	4.4895
ACA1_116150	hypothetical protein	4.69064	4.4895	4.4895	4.4895	4.4895	4.4895	4.4895	4.4895	4.4895
ACA1_116190	leucine rich repeat domain containing protein	5.41371	4.4895	4.4895	4.4895	4.4895	4.4895	4.4895	4.4895	4.4895
ACA1_116230	protein kinase domain contain	5.62494	5.01053	5.6362	4.4895	4.4895	4.4895	4.4895	4.4895	4.4895
ACA1_116240	glutathione Stransferase, C-terminal domain containing protein	4.69064	5.01053	4.4895	4.4895	4.4895	4.4895	4.4895	4.4895	4.4895
ACA1_116270	hypothetical protein	5.52318	5.01053	5.1739	4.4895	4.4895	4.4895	4.4895	4.4895	4.4895
ACA1_116520	NCS1 family transporter	4.86714	4.4895	4.4895	4.4895	4.4895	4.4895	4.4895	4.4895	4.4895
ACA1_116590	hypothetical protein	5.85176	5.39251	4.4895	4.4895	4.4895	4.4895	4.4895	4.4895	4.4895
ACA1_116610	HECTdomain (ubiquitin-transferase)	9.91206	9.68596	10.2715	11.24	11.6833	10.8576	10.7724	11.8606	12.1162
ACA1_116640	Lipase	4.78159	4.4895	4.4895	4.4895	4.4895	4.4895	4.4895	4.4895	4.4895
ACA1_116690	hypothetical protein	5.09701	5.01053	5.6362	4.4895	4.4895	4.4895	4.4895	4.4895	4.4895
ACA1_116710	hypothetical protein	4.78159	5.01053	4.4895	4.4895	4.4895	4.4895	4.4895	4.4895	4.4895
ACA1_116790	hypothetical protein	5.46948	5.01053	5.1739	4.4895	4.4895	4.4895	4.4895	4.4895	4.4895
ACA1_116820	Nse1, component	6.37426	5.39251	4.4895	4.4895	4.4895	4.4895	4.4895	4.4895	4.4895
ACA1_116850	JmjC domain containing	6.68817	6.34145	5.6362	4.4895	4.4895	4.4895	4.4895	4.4895	4.4895
ACA1_116870	Actin	5.35569	5.01053	5.1739	4.4895	4.4895	4.4895	4.4895	4.4895	4.4895
ACA1_116960	hypothetical protein	10.6607	9.65132	10.895	10.2534	9.40022	9.30718	9.79076	10.0434	9.00355
ACA1_117030	cyclin protein	4.9479	4.4895	5.1739	4.4895	4.4895	4.4895	4.4895	4.4895	4.4895
ACA1_117140	GTPase-activator protein for Ras family GTPase	5.76526	5.39251	5.1739	4.4895	4.4895	4.4895	4.4895	4.4895	4.4895
ACA1_117200	Titin, putative	5.02438	5.01053	5.6362	4.4895	4.4895	4.4895	4.4895	6.26343	4.4895
ACA1_117260	hypothetical protein	4.78159	5.01053	4.4895	4.4895	4.4895	4.4895	4.4895	4.4895	4.4895
ACA1_117280	hypothetical protein	4.59358	4.4895	4.4895	4.4895	4.4895	4.4895	4.4895	4.4895	4.4895
ACA1_117350	hypothetical protein	4.86714	5.39251	5.1739	4.4895	4.4895	4.4895	4.4895	4.4895	4.4895
ACA1_118730	hypothetical protein	4.86714	4.4895	4.4895	4.4895	4.4895	4.4895	4.4895	4.4895	4.4895
ACA1_118760	HEAT repeat domain containing protein	8.26734	8.1613	8.60968	9.27968	10.376	9.30718	10.7724	9.80121	9.71504
ACA1_118770	transmembrane protein 144 family protein	4.78159	5.39251	5.1739	4.4895	4.4895	4.4895	4.4895	4.4895	4.4895
ACA1_119120	Ubox domain containing protein	4.69064	5.01053	5.6362	4.4895	4.4895	4.4895	4.4895	4.4895	4.4895
ACA1_119420	hypothetical protein	4.59358	4.4895	4.4895	4.4895	4.4895	4.4895	4.4895	4.4895	4.4895
ACA1_119470	mitogen-activated protein kinase kinase	5.23214	5.01053	4.4895	4.4895	4.4895	4.4895	4.4895	4.4895	4.4895
ACA1_119610	hypothetical protein	5.85176	5.69423	5.1739	4.4895	4.4895	4.4895	4.4895	4.4895	4.4895
ACA1_120560	U2 snRNP component prp10, putative	4.59358	4.4895	4.4895	4.4895	4.4895	4.4895	4.4895	4.4895	4.4895
ACA1_120780	hypothetical protein	4.69064	4.4895	4.4895	4.4895	4.4895	4.4895	4.4895	4.4895	4.4895
ACA1_120790	hypothetical protein	5.67324	5.94363	5.6362	4.4895	4.4895	4.4895	4.4895	4.4895	4.4895
ACA1_120920	hypothetical protein	4.9479	5.01053	5.6362	4.4895	4.4895	4.4895	4.4895	4.4895	4.4895
ACA1_121240	phosphatidylinosito	5.46948	6.78664	5.98576	4.4895	4.4895	4.4895	4.4895	4.4895	4.4895
ACA1_121250	hypothetical protein	5.29523	5.94363	4.4895	4.4895	4.4895	4.4895	4.4895	4.4895	4.4895
ACA1_121310	hypothetical protein	4.59358	4.4895	4.4895	4.4895	4.4895	4.4895	4.4895	4.4895	4.4895
ACA1_121790	hypothetical protein	5.02438	4.4895	4.4895	4.4895	4.4895	4.4895	4.4895	4.4895	4.4895
ACA1_121810	hypothetical protein	4.59358	4.4895	4.4895	4.4895	4.4895	4.4895	4.4895	4.4895	4.4895
ACA1_122300	tetratricopeptide repeat domain containing protein	5.02438	4.4895	4.4895	4.4895	4.4895	4.4895	4.4895	4.4895	4.4895
ACA1_122310	hypothetical protein	4.59358	4.4895	4.4895	4.4895	4.4895	4.4895	4.4895	4.4895	4.4895
ACA1_122330	hypothetical protein	4.86714	5.01053	4.4895	4.4895	4.4895	4.4895	4.4895	4.4895	4.4895
ACA1_122370	Short chain oxidoreductase	5.35569	5.01053	5.1739	4.4895	4.4895	4.4895	4.4895	4.4895	4.4895
ACA1_122710	hypothetical protein	5.57496	5.01053	4.4895	4.4895	4.4895	4.4895	4.4895	4.4895	4.4895
ACA1_123390	hypothetical protein	5.23214	4.4895	4.4895	4.4895	4.4895	4.4895	4.4895	4.4895	4.4895
ACA1_123780	AT hook motif domain containing prot	5.41371	5.01053	4.4895	4.4895	4.4895	4.4895	4.4895	4.4895	4.4895
ACA1_123810	hypothetical protein	4.78159	4.4895	4.4895	4.4895	4.4895	4.4895	4.4895	4.4895	4.4895
ACA1_123820	hypothetical protein	5.57496	5.69423	5.1739	4.4895	4.4895	4.4895	4.4895	4.4895	4.4895
ACA1_123830	hypothetical protein	5.35569	5.69423	6.26693	4.4895	4.4895	4.4895	4.4895	4.4895	4.4895
ACA1_123860	hypothetical protein	5.57496	5.39251	5.98576	4.4895	4.4895	4.4895	4.4895	4.4895	4.4895
ACA1_124010	hypothetical protein	4.86714	5.01053	5.98576	4.4895	4.4895	4.4895	4.4895	4.4895	4.4895
ACA1_124240	hypothetical protein	5.46948	5.39251	5.1739	4.4895	4.4895	4.4895	4.4895	4.4895	4.4895
ACA1_124260	glycerol-3-phosphate dehydr	4.59358	4.4895	4.4895	4.4895	4.4895	4.4895	4.4895	4.4895	4.4895
ACA1_124800	Integrase	4.78159	5.01053	5.1739	4.4895	4.4895	4.4895	4.4895	4.4895	4.4895
ACA1_125080	hypothetical protein	5.62494	4.4895	4.4895	4.4895	4.4895	4.4895	4.4895	4.4895	4.4895
ACA1_125090	hypothetical protein	4.69064	4.4895	4.4895	4.4895	4.4895	4.4895	4.4895	4.4895	4.4895
ACA1_125100	hypothetical protein	5.23214	5.39251	4.4895	4.4895	4.4895	4.4895	4.4895	4.4895	4.4895
ACA1_125120	hypothetical protein	5.46948	4.4895	5.1739	4.4895	4.4895	4.4895	4.4895	4.4895	4.4895
ACA1_125550	DNAdirected RNA polymerase	11.763	11.34	11.4463	12.0416	11.3638	13.0662	11.3511	12.6882	12.1684
ACA1_125800	PHprotein kinase domain containing protein	4.69064	4.4895	4.4895	4.4895	4.4895	4.4895	4.4895	4.4895	4.4895
ACA1_125930	hypothetical protein	4.69064	5.01053	5.1739	4.4895	4.4895	4.4895	4.4895	4.4895	4.4895
ACA1_126000	hypothetical protein	4.78159	4.4895	4.4895	4.4895	4.4895	4.4895	4.4895	4.4895	4.4895
ACA1_126140	helicase associated domain containin	5.41371	5.01053	4.4895	4.4895	4.4895	4.4895	4.4895	4.4895	4.4895
ACA1_126330	FYVE zinc finger domain containing protein	5.41371	4.4895	5.1739	4.4895	4.4895	4.4895	4.4895	4.4895	4.4895
ACA1_126460	hypothetical protein	5.52318	4.4895	5.1739	4.4895	4.4895	4.4895	4.4895	4.4895	4.4895
ACA1_126690	Phosphatidylinositol4-ph	6.61586	5.94363	4.4895	4.4895	4.4895	4.4895	4.4895	4.4895	4.4895
ACA1_126740	hypothetical protein	4.9479	4.4895	5.98576	4.4895	4.4895	4.4895	4.4895	4.4895	4.4895
ACA1_127090	hypothetical protein	4.86714	4.4895	4.4895	4.4895	4.4895	4.4895	4.4895	4.4895	4.4895
ACA1_127420	aconitate hydratase	11.3693	12.4766	12.9779	14.2283	15.4183	15.2332	13.2165	12.5642	12.4473
ACA1_127580	hypothetical protein	6.53974	5.39251	5.1739	4.4895	4.4895	4.4895	4.4895	4.4895	4.4895
ACA1_127590	hypothetical protein	4.69064	4.4895	5.1739	4.4895	4.4895	4.4895	4.4895	4.4895	4.4895
ACA1_127860	hypothetical protein	4.59358	4.4895	4.4895	4.4895	4.4895	4.4895	4.4895	4.4895	4.4895
ACA1_127890	spermidine synthase	13.4624	14.2069	14.6043	14.0359	14.2111	14.1638	13.756	13.0628	12.2675
ACA1_127910	acetyltransferase, GNAT superfamily protein	4.78159	4.4895	5.1739	4.4895	4.4895	4.4895	4.4895	4.4895	4.4895
ACA1_128170	DNAdirected RNA polymera	8.71088	8.50958	8.39271	9.27968	10.376	9.30718	10.7724	9.51	9.40272
ACA1_128180	methyltransferase	4.69064	4.4895	4.4895	4.4895	4.4895	4.4895	4.4895	4.4895	4.4895
ACA1_128450	0	14.9152	15.1462	14.4441	12.6909	12.9405	12.7193	11.7631	10.374	9.40272
ACA1_128520	hypothetical protein	4.86714	4.4895	4.4895	4.4895	4.4895	4.4895	4.4895	4.4895	4.4895
ACA1_128570	0	4.9479	4.4895	5.6362	4.4895	4.4895	4.4895	4.4895	4.4895	4.4895
ACA1_129000	Raslike protein rasS, putative	4.59358	4.4895	4.4895	4.4895	4.4895	4.4895	4.4895	4.4895	4.4895
ACA1_129210	WD domain, G-beta repeat-containing protein	5.29523	6.15621	5.6362	4.4895	4.4895	4.4895	4.4895	4.4895	4.4895
ACA1_129220	Nucleoside-triphosphatase	4.86714	4.4895	4.4895	4.4895	4.4895	4.4895	4.4895	4.4895	4.4895
ACA1_129920	hypothetical protein	6.40319	6.15621	5.6362	4.4895	4.4895	4.4895	4.4895	4.4895	4.4895
ACA1_129940	hypothetical protein	5.16615	4.4895	5.1739	4.4895	4.4895	4.4895	4.4895	4.4895	4.4895
ACA1_130300	BTB/POZ domain containing protein	4.69064	4.4895	5.1739	4.4895	4.4895	4.4895	4.4895	4.4895	4.4895
ACA1_130310	sterol desaturase	4.78159	4.4895	4.4895	4.4895	4.4895	4.4895	4.4895	4.4895	4.4895
ACA1_130440	hypothetical protein	4.59358	4.4895	4.4895	4.4895	4.4895	4.4895	4.4895	4.4895	4.4895
ACA1_130450	BTB/POZ domain containing protein	6.15366	6.34145	5.6362	4.4895	4.4895	4.4895	4.4895	4.4895	4.4895
ACA1_130460	C5orf4 protein	5.09701	5.01053	5.1739	4.4895	4.4895	4.4895	4.4895	4.4895	4.4895
ACA1_130600	hypothetical protein	5.71999	5.39251	5.6362	4.4895	4.4895	4.4895	4.4895	4.4895	4.4895
ACA1_130730	metaldependent hydrolase	4.59358	4.4895	5.1739	4.4895	4.4895	4.4895	4.4895	4.4895	4.4895
ACA1_131170	integrase core domain containing protein	4.69064	4.4895	4.4895	4.4895	4.4895	4.4895	4.4895	4.4895	4.4895
ACA1_131250	hypothetical protein	5.16615	5.01053	4.4895	4.4895	4.4895	4.4895	4.4895	4.4895	4.4895
ACA1_131450	FHA domain containing protein	4.69064	5.01053	5.1739	4.4895	4.4895	4.4895	4.4895	4.4895	4.4895
ACA1_131520	SAM domain (Sterile alpha motif) dom	5.57496	5.39251	5.1739	4.4895	4.4895	4.4895	4.4895	4.4895	4.4895
ACA1_131530	hydrolase, NUDIX domain containing protein	5.35569	4.4895	4.4895	4.4895	4.4895	4.4895	4.4895	4.4895	4.4895
ACA1_131550	cyclic nucleotidebinding domain containing protein	6.64037	6.34145	5.98576	4.4895	4.4895	4.4895	4.4895	4.4895	4.4895
ACA1_131580	glycerol3-phosphate dehydro	4.9479	4.4895	5.6362	4.4895	4.4895	4.4895	4.4895	4.4895	4.4895
ACA1_131740	amino acid adenylation subfamily protein	9.87123	9.68596	9.91192	10.2534	10.9529	10.8576	10.7724	9.27705	9.40272
ACA1_131750	hypothetical protein	5.35569	5.69423	5.6362	4.4895	4.4895	4.4895	4.4895	4.4895	4.4895
ACA1_131790	protein from patent family protein	5.16615	4.4895	5.1739	4.4895	4.4895	4.4895	4.4895	4.4895	4.4895
ACA1_131820	zinc knuckle domain containing protein	5.02438	5.39251	5.1739	4.4895	4.4895	4.4895	4.4895	4.4895	4.4895
ACA1_132010	hypothetical protein	4.69064	5.01053	4.4895	4.4895	4.4895	4.4895	4.4895	4.4895	4.4895
ACA1_132140	hypothetical protein	4.69064	4.4895	5.1739	4.4895	4.4895	4.4895	4.4895	4.4895	4.4895
ACA1_132360	glutamine-tRNA	10.0715	9.96517	9.54143	9.27968	10.376	11.5876	11.3511	10.1848	10.1894
ACA1_132400	pirin domain containing protein	4.86714	4.4895	5.1739	4.4895	4.4895	4.4895	4.4895	4.4895	4.4895
ACA1_132420	TolA protein	4.69064	4.4895	4.4895	4.4895	4.4895	4.4895	4.4895	4.4895	4.4895
ACA1_132580	hypothetical protein	4.9479	5.69423	4.4895	4.4895	4.4895	4.4895	4.4895	4.4895	4.4895
ACA1_132640	hypothetical protein	6.844	6.65295	6.50213	4.4895	4.4895	4.4895	4.4895	6.26343	4.4895
ACA1_132800	formin domain containing protein	5.29523	5.69423	5.1739	4.4895	4.4895	4.4895	4.4895	4.4895	4.4895
ACA1_132860	DJ1/PfpI superfamily protein	5.35569	5.01053	4.4895	4.4895	4.4895	4.4895	4.4895	4.4895	4.4895
ACA1_132900	CBS domain containing protein	4.69064	4.4895	4.4895	4.4895	4.4895	4.4895	4.4895	4.4895	4.4895
ACA1_133130	Helixloop-helix DNA-binding domain containing protein	5.23214	5.01053	5.98576	4.4895	4.4895	4.4895	4.4895	4.4895	4.4895
ACA1_133180	Ser/Thr phosphatase family superfamily protein	7.23044	6.50559	5.6362	4.4895	4.4895	4.4895	4.4895	4.4895	4.4895
ACA1_133210	SH3 domain containing protein	5.76526	4.4895	5.6362	4.4895	4.4895	4.4895	4.4895	4.4895	4.4895
ACA1_133350	acyltra	5.76526	5.94363	5.1739	4.4895	4.4895	4.4895	4.4895	4.4895	4.4895
ACA1_133490	hypothetical protein	4.78159	4.4895	4.4895	4.4895	4.4895	4.4895	4.4895	4.4895	4.4895
ACA1_133580	hypothetical protein	4.69064	4.4895	4.4895	4.4895	4.4895	4.4895	4.4895	4.4895	4.4895
ACA1_133610	Calponin domain containing protein	4.78159	4.4895	5.1739	4.4895	4.4895	4.4895	4.4895	4.4895	4.4895
ACA1_133850	hypothetical protein	5.23214	5.01053	5.1739	4.4895	4.4895	4.4895	4.4895	4.4895	4.4895
ACA1_134290	hypothetical protein	4.86714	4.4895	4.4895	4.4895	4.4895	4.4895	4.4895	4.4895	4.4895
ACA1_134400	hypothetical protein	6.45937	5.69423	5.1739	4.4895	4.4895	4.4895	4.4895	4.4895	4.4895
ACA1_134620	hypothetical protein	5.35569	5.01053	4.4895	4.4895	4.4895	4.4895	4.4895	4.4895	4.4895
ACA1_135140	hypothetical protein	6.86495	5.94363	5.98576	4.4895	4.4895	4.4895	4.4895	4.4895	4.4895
ACA1_135570	hypothetical protein	4.59358	4.4895	4.4895	4.4895	4.4895	4.4895	4.4895	4.4895	4.4895
ACA1_135650	MYND finger domain containing protein	5.09701	5.01053	4.4895	4.4895	4.4895	4.4895	4.4895	4.4895	4.4895
ACA1_135670	ATP pump family proteinprotein ENTH domain epsin related family protein	5.02438	5.39251	4.4895	4.4895	4.4895	4.4895	4.4895	4.4895	4.4895
ACA1_135680	AMP-activated protein kin	4.78159	5.01053	4.4895	4.4895	4.4895	4.4895	4.4895	4.4895	4.4895
ACA1_135960	vacuolar atp synthase subunit h, putative	13.0209	12.5953	12.3226	11.8205	11.6833	12.2617	12.0831	10.7829	10.1894
ACA1_136110	Fbox domain containing protein	4.86714	4.4895	5.1739	4.4895	4.4895	4.4895	4.4895	4.4895	4.4895
ACA1_136120	tetratricopeptide domain containing protein	4.78159	4.4895	5.1739	4.4895	4.4895	4.4895	4.4895	4.4895	4.4895
ACA1_136160	primase zinc finger protein	7.63588	6.15621	5.98576	4.4895	4.4895	4.4895	4.4895	4.4895	4.4895
ACA1_136750	hypothetical protein	4.69064	4.4895	4.4895	4.4895	4.4895	4.4895	4.4895	4.4895	4.4895
ACA1_136790	Tubulin/FtsZ family, GTPase domain containing protein	5.41371	4.4895	5.6362	4.4895	4.4895	4.4895	4.4895	4.4895	4.4895
ACA1_136800	hypothetical protein	4.78159	5.01053	4.4895	4.4895	4.4895	4.4895	4.4895	4.4895	4.4895
ACA1_136810	hypothetical protein	5.16615	4.4895	4.4895	4.4895	4.4895	4.4895	4.4895	4.4895	4.4895
ACA1_137280	hypothetical protein	4.78159	4.4895	4.4895	4.4895	4.4895	4.4895	4.4895	4.4895	4.4895
ACA1_137290	hypothetical protein	4.69064	4.4895	4.4895	4.4895	4.4895	4.4895	4.4895	4.4895	4.4895
ACA1_137440	hypothetical protein	4.59358	4.4895	4.4895	4.4895	4.4895	4.4895	4.4895	4.4895	4.4895
ACA1_137470	hypothetical protein	4.59358	4.4895	4.4895	4.4895	4.4895	4.4895	4.4895	4.4895	4.4895
ACA1_138040	elongation factor 1alpha, somatic form, putative	15.3523	15.5763	16.231	14.0864	13.8772	14.466	14.1478	14.799	15.1231
ACA1_138070	protein kinase domain containing protein	7.02242	6.78664	6.70431	4.4895	4.4895	4.4895	4.4895	4.4895	4.4895
ACA1_138320	brix domain containing protein	5.85176	5.39251	5.98576	4.4895	4.4895	4.4895	4.4895	4.4895	4.4895
ACA1_138370	Ras subfamily protein	5.76526	5.01053	5.6362	4.4895	4.4895	4.4895	4.4895	4.4895	4.4895
ACA1_138380	cathepsin Llike cysteine protease	5.09701	4.4895	4.4895	4.4895	4.4895	4.4895	4.4895	4.4895	4.4895
ACA1_138400	hypothetical protein	5.67324	5.94363	5.6362	4.4895	4.4895	4.4895	4.4895	4.4895	4.4895
ACA1_138420	hypothetical protein	6.34474	5.39251	6.26693	4.4895	4.4895	4.4895	4.4895	4.4895	4.4895
ACA1_138470	ribosomal protein L12e, putative	4.69064	4.4895	4.4895	4.4895	4.4895	4.4895	4.4895	4.4895	4.4895
ACA1_138530	peptidase, S54 (rhomboid) subfamily protein	4.78159	4.4895	4.4895	4.4895	4.4895	4.4895	4.4895	4.4895	4.4895
ACA1_138750	hypothetical protein	5.23214	5.01053	5.1739	4.4895	4.4895	4.4895	4.4895	4.4895	4.4895
ACA1_138970	hypothetical protein	4.78159	4.4895	4.4895	4.4895	4.4895	4.4895	4.4895	4.4895	4.4895
ACA1_138980	dynamin family protein	5.97249	6.34145	5.98576	4.4895	4.4895	4.4895	4.4895	4.4895	4.4895
ACA1_139010	dTDPD-glucose 4,6-dehydratase	4.69064	5.01053	4.4895	4.4895	4.4895	4.4895	4.4895	4.4895	4.4895
ACA1_139280	protein kinase domain containing protein	5.23214	5.69423	4.4895	4.4895	4.4895	4.4895	4.4895	4.4895	4.4895
ACA1_139390	hypothetical protein	5.35569	4.4895	5.6362	4.4895	4.4895	4.4895	4.4895	4.4895	4.4895
ACA1_139410	hypothetical protein	5.16615	5.01053	4.4895	4.4895	4.4895	4.4895	4.4895	6.26343	4.4895
ACA1_139430	kinesin motor domain containing protein	9.85562	10.1125	10.3789	11.24	11.9447	10.8576	10.7724	10.374	9.71504
ACA1_139560	hypothetical protein	5.57496	5.01053	5.6362	4.4895	4.4895	4.4895	4.4895	4.4895	4.4895
ACA1_139700	hypothetical protein	4.9479	5.01053	4.4895	4.4895	4.4895	4.4895	4.4895	4.4895	4.4895
ACA1_140250	hypothetical protein	5.29523	5.39251	5.98576	4.4895	4.4895	4.4895	4.4895	4.4895	4.4895
ACA1_140400	Fbox domain containing protein	5.35569	4.4895	5.6362	4.4895	4.4895	4.4895	4.4895	4.4895	4.4895
ACA1_140540	MORN repeatcontaining protein	4.69064	4.4895	4.4895	4.4895	4.4895	4.4895	4.4895	4.4895	4.4895
ACA1_140720	GATA zinc finger domain containing protein	5.41371	5.01053	4.4895	4.4895	4.4895	4.4895	4.4895	4.4895	4.4895
ACA1_140730	kelch repeat protein	7.29361	6.65295	6.50213	4.4895	4.4895	4.4895	4.4895	4.4895	4.4895
ACA1_140770	ATPase, AAA domain containing protein	5.80916	5.69423	4.4895	4.4895	4.4895	4.4895	4.4895	4.4895	4.4895
ACA1_140920	Ser/Thr protein phosphatase superfamily	4.59358	4.4895	5.1739	4.4895	4.4895	4.4895	4.4895	4.4895	4.4895
ACA1_140970	SH3 domain containing protein	4.86714	5.39251	4.4895	4.4895	4.4895	4.4895	4.4895	4.4895	4.4895
ACA1_141090	SAM domain (Sterile alpha motif) domain containing protein	4.78159	4.4895	4.4895	4.4895	4.4895	4.4895	4.4895	4.4895	4.4895
ACA1_141550	ribosome biogenesis GTPase Der, putative	6.43155	6.65295	5.6362	4.4895	4.4895	4.4895	4.4895	4.4895	4.4895
ACA1_141810	hypothetical protein	4.78159	4.4895	4.4895	4.4895	4.4895	4.4895	4.4895	4.4895	4.4895
ACA1_141880	RNA editing ligase	4.9479	4.4895	5.1739	4.4895	4.4895	4.4895	4.4895	4.4895	4.4895
ACA1_141940	hypothetical protein	7.05924	5.69423	5.6362	4.4895	4.4895	4.4895	4.4895	4.4895	4.4895
ACA1_142240	actin subfamily protein	5.02438	5.01053	4.4895	4.4895	4.4895	4.4895	4.4895	4.4895	4.4895
ACA1_142280	hypothetical protein	4.78159	4.4895	4.4895	4.4895	4.4895	4.4895	4.4895	4.4895	4.4895
ACA1_142290	hypothetical protein	6.844	5.69423	5.98576	4.4895	4.4895	4.4895	4.4895	4.4895	4.4895
ACA1_142330	peptidyltRNA hydrolase domain containing protein	5.89313	5.01053	4.4895	4.4895	4.4895	4.4895	4.4895	4.4895	4.4895
ACA1_142360	hypothetical protein	5.76526	5.39251	5.98576	4.4895	4.4895	4.4895	4.4895	4.4895	4.4895
ACA1_142380	hypothetical protein	4.69064	4.4895	4.4895	4.4895	4.4895	4.4895	4.4895	4.4895	4.4895
ACA1_142560	Ehepsin, putative	5.67324	5.69423	4.4895	4.4895	4.4895	4.4895	4.4895	4.4895	4.4895
ACA1_142620	ATPdependent RNA helicase dbp2,	10.7422	10.9979	11.5219	10.8295	11.3638	10.2814	10.7724	9.61374	10.1894
ACA1_142840	hypothetical protein	5.09701	5.01053	5.6362	4.4895	4.4895	4.4895	4.4895	4.4895	4.4895
ACA1_142940	RhoGEF domain containing protein	5.09701	5.01053	5.6362	4.4895	4.4895	4.4895	4.4895	4.4895	4.4895
ACA1_143310	ribosomal L29e protein family	14.1623	14.3487	15.7846	13.1371	12.8154	12.5823	10.7724	10.3137	9.71504
ACA1_143320	hypothetical protein	4.9479	4.4895	4.4895	4.4895	4.4895	4.4895	4.4895	4.4895	4.4895
ACA1_143560	hypothetical protein	4.69064	4.4895	4.4895	4.4895	4.4895	4.4895	4.4895	4.4895	4.4895
ACA1_143570	hypothetical protein	5.23214	4.4895	4.4895	4.4895	4.4895	4.4895	4.4895	4.4895	4.4895
ACA1_143640	hypothetical protein	5.41371	5.01053	5.1739	4.4895	4.4895	4.4895	4.4895	4.4895	4.4895
ACA1_143660	hypothetical protein	6.59093	6.15621	6.26693	4.4895	4.4895	4.4895	4.4895	4.4895	4.4895
ACA1_143700	Ras subfamily protein	5.71999	6.15621	6.26693	4.4895	4.4895	4.4895	4.4895	4.4895	4.4895
ACA1_143760	hypothetical protein	5.76526	4.4895	5.98576	4.4895	4.4895	4.4895	4.4895	4.4895	4.4895
ACA1_144050	eukaryotic translation initiation factor SUI1 fam	5.02438	5.39251	5.6362	4.4895	4.4895	4.4895	4.4895	4.4895	4.4895
ACA1_144060	vitamin Kdependent gamma-carboxylase	5.57496	5.69423	5.6362	4.4895	4.4895	4.4895	4.4895	4.4895	4.4895
ACA1_144120	protein kinase domain containing protein	5.23214	5.01053	5.1739	4.4895	4.4895	4.4895	4.4895	4.4895	4.4895
ACA1_144280	hypothetical protein	5.93336	6.50559	5.6362	4.4895	4.4895	4.4895	4.4895	4.4895	4.4895
ACA1_144300	RNA recognition motif domain containing protein	5.85176	5.69423	5.1739	4.4895	4.4895	4.4895	4.4895	4.4895	4.4895
ACA1_144310	ubiquitin fusion degradation protein ufd1 p	6.0839	5.39251	5.6362	4.4895	4.4895	4.4895	4.4895	4.4895	4.4895
ACA1_144330	GTPase-activator protein for Ras family GTPase	4.9479	4.4895	4.4895	4.4895	4.4895	4.4895	4.4895	4.4895	4.4895
ACA1_144400	WD repeat protein WDR3, putative	9.95666	10.6399	11.4393	12.5539	10.9529	10.8576	9.79076	10.691	11.6123
ACA1_144460	hypothetical protein	5.29523	5.69423	5.1739	4.4895	4.4895	4.4895	4.4895	4.4895	4.4895
ACA1_144680	hypothetical protein	4.9479	4.4895	4.4895	4.4895	4.4895	4.4895	4.4895	4.4895	4.4895
ACA1_144810	putative DNA helicase	5.41371	5.39251	4.4895	4.4895	4.4895	4.4895	4.4895	4.4895	4.4895
ACA1_144820	Ankyrin	5.80916	5.39251	5.98576	4.4895	4.4895	4.4895	4.4895	4.4895	4.4895
ACA1_144870	phospholipase D/transphosphatidylase	4.69064	4.4895	4.4895	4.4895	4.4895	4.4895	4.4895	4.4895	4.4895
ACA1_144900	phosphoenolpyruvate phosphomutase	11.5937	12.4365	14.2171	14.4759	14.2111	14.466	15.3394	15.3082	15.0485
ACA1_144910	Synapsin, ATP binding domain containing protein	5.97249	5.39251	5.1739	4.4895	4.4895	4.4895	4.4895	4.4895	4.4895
ACA1_145190	RNA 3'-terminal phosphate cyc	5.89313	5.69423	4.4895	4.4895	4.4895	4.4895	4.4895	4.4895	4.4895
ACA1_145200	hypothetical protein	4.59358	4.4895	4.4895	4.4895	4.4895	4.4895	4.4895	4.4895	4.4895
ACA1_145260	DnaJ domain containing protein	5.46948	5.69423	5.98576	4.4895	4.4895	4.4895	4.4895	4.4895	4.4895
ACA1_145720	SAM domain (Sterile alpha motif) domain containi	4.86714	4.4895	4.4895	4.4895	4.4895	4.4895	4.4895	4.4895	4.4895
ACA1_145900	hypothetical protein	5.02438	5.01053	4.4895	4.4895	4.4895	4.4895	4.4895	4.4895	4.4895
ACA1_146270	ubiquitin domain containing protein	5.46948	5.01053	5.1739	4.4895	4.4895	4.4895	4.4895	4.4895	4.4895
ACA1_146430	catalase	5.23214	5.01053	5.1739	4.4895	4.4895	4.4895	4.4895	4.4895	4.4895
ACA1_146470	MORN repeatcontaining protein	4.69064	5.01053	5.1739	4.4895	4.4895	4.4895	4.4895	4.4895	4.4895
ACA1_146510	hypothetical protein	4.78159	5.39251	4.4895	4.4895	4.4895	4.4895	4.4895	4.4895	4.4895
ACA1_146520	hypothetical protein	6.01059	5.39251	4.4895	4.4895	4.4895	4.4895	4.4895	4.4895	4.4895
ACA1_146560	hypothetical protein	4.59358	4.4895	4.4895	4.4895	4.4895	4.4895	4.4895	4.4895	4.4895
ACA1_146570	Ceramidase	4.86714	4.4895	4.4895	4.4895	4.4895	4.4895	4.4895	4.4895	4.4895
ACA1_146590	hypothetical protein	4.86714	4.4895	4.4895	4.4895	4.4895	4.4895	4.4895	4.4895	4.4895
ACA1_146860	HEAT repeat-containing protein	6.01059	5.39251	5.98576	4.4895	4.4895	4.4895	4.4895	4.4895	4.4895
ACA1_147390	acetyltransferase, GNAT superfamily protein	5.23214	4.4895	5.6362	4.4895	4.4895	4.4895	4.4895	4.4895	4.4895
ACA1_147530	hypothetical protein	5.09701	4.4895	5.6362	4.4895	4.4895	4.4895	4.4895	4.4895	4.4895
ACA1_147540	hypothetical protein	5.35569	5.01053	5.6362	4.4895	4.4895	4.4895	4.4895	4.4895	4.4895
ACA1_147550	transmembrane ami	4.9479	4.4895	4.4895	4.4895	4.4895	4.4895	4.4895	4.4895	4.4895
ACA1_147560	hypothetical protein	5.35569	5.01053	4.4895	4.4895	4.4895	4.4895	4.4895	4.4895	4.4895
ACA1_147680	hypothetical protein	5.02438	4.4895	4.4895	4.4895	4.4895	4.4895	4.4895	4.4895	4.4895
ACA1_147710	FGGAP repeat domain con	4.78159	5.01053	4.4895	4.4895	4.4895	4.4895	4.4895	4.4895	4.4895
ACA1_147730	hypothetical protein	4.59358	4.4895	4.4895	4.4895	4.4895	4.4895	4.4895	4.4895	4.4895
ACA1_148000	GMC oxidoreductase	5.35569	5.01053	4.4895	4.4895	4.4895	4.4895	4.4895	4.4895	4.4895
ACA1_148130	Mpv17 / PMP22 family protein	4.59358	4.4895	5.1739	4.4895	4.4895	4.4895	4.4895	4.4895	4.4895
ACA1_148480	I/LWEQ domain containing protein	10.9828	11.0117	11.5873	10.2534	10.9529	10.8576	11.3511	10.4876	11.8224
ACA1_148520	TBC domain containing protein	5.85176	6.65295	5.6362	4.4895	4.4895	4.4895	4.4895	4.4895	4.4895
ACA1_148530	zinc knuckle domain containing protein	5.57496	4.4895	4.4895	4.4895	4.4895	4.4895	4.4895	4.4895	4.4895
ACA1_148670	hypothetical protein	5.29523	4.4895	4.4895	4.4895	4.4895	4.4895	4.4895	4.4895	4.4895
ACA1_149010	rapid response to glucose protein 1, putative	5.80916	6.15621	5.6362	4.4895	4.4895	4.4895	4.4895	4.4895	4.4895
ACA1_149040	CUE domain containing protein	4.78159	4.4895	4.4895	4.4895	4.4895	4.4895	4.4895	4.4895	4.4895
ACA1_149090	betamannosidase	4.69064	4.4895	4.4895	4.4895	4.4895	4.4895	4.4895	4.4895	4.4895
ACA1_149110	hypothetical protein	5.02438	5.01053	4.4895	4.4895	4.4895	4.4895	4.4895	4.4895	4.4895
ACA1_149120	ribosomal protein L11 methyltransferase	5.76526	6.34145	5.6362	4.4895	4.4895	4.4895	4.4895	4.4895	4.4895
ACA1_149200	PHprotein kinase domain containing protein	4.9479	4.4895	5.1739	4.4895	4.4895	4.4895	4.4895	4.4895	4.4895
ACA1_149250	hypothetical protein	4.9479	4.4895	4.4895	4.4895	4.4895	4.4895	4.4895	4.4895	4.4895
ACA1_149280	hypothetical protein	4.59358	4.4895	4.4895	4.4895	4.4895	4.4895	4.4895	4.4895	4.4895
ACA1_149330	GATA zinc finger domain containing protein	4.78159	4.4895	4.4895	4.4895	4.4895	4.4895	4.4895	4.4895	4.4895
ACA1_149390	hypothetical protein	5.85176	5.01053	5.1739	4.4895	4.4895	4.4895	4.4895	4.4895	4.4895
ACA1_149430	hypothetical protein	4.69064	4.4895	4.4895	4.4895	4.4895	4.4895	4.4895	4.4895	4.4895
ACA1_149520	WD domain, Gbeta repeat-containing	6.15366	5.94363	6.26693	4.4895	4.4895	4.4895	4.4895	4.4895	4.4895
ACA1_149850	hypothetical protein	5.97249	6.50559	6.26693	4.4895	4.4895	4.4895	4.4895	4.4895	4.4895
ACA1_149870	RhoGAP domain containing protein	5.09701	5.01053	4.4895	4.4895	4.4895	4.4895	4.4895	4.4895	4.4895
ACA1_149880	RasGEF domain containing protein	5.35569	5.01053	5.6362	4.4895	4.4895	4.4895	4.4895	4.4895	4.4895
ACA1_149910	SWIM zinc finger domain containing protein	5.29523	5.01053	5.6362	4.4895	4.4895	4.4895	4.4895	4.4895	4.4895
ACA1_149950	Ser/Thr phosphatase family superfamily protein	5.46948	5.39251	4.4895	4.4895	4.4895	4.4895	4.4895	4.4895	4.4895
ACA1_149970	Poly(ADPribose) polymerase catalytic do	6.73444	6.34145	5.98576	4.4895	4.4895	4.4895	4.4895	4.4895	4.4895
ACA1_150050	tRNA methyl transferase	5.93336	5.94363	5.1739	4.4895	4.4895	4.4895	4.4895	4.4895	4.4895
ACA1_150060	twinarginine translocation pathway signal, putative	4.69064	4.4895	4.4895	4.4895	4.4895	4.4895	4.4895	4.4895	4.4895
ACA1_150100	spermidine synthase	4.59358	4.4895	5.1739	4.4895	4.4895	4.4895	4.4895	4.4895	4.4895
ACA1_150430	serine/threonine protein kinase	4.69064	4.4895	4.4895	4.4895	4.4895	4.4895	4.4895	4.4895	4.4895
ACA1_150540	hypothetical protein	4.59358	4.4895	4.4895	4.4895	4.4895	4.4895	4.4895	4.4895	4.4895
ACA1_150580	hypothetical protein	6.25236	5.69423	5.1739	4.4895	4.4895	4.4895	4.4895	4.4895	4.4895
ACA1_150730	hypothetical protein	5.52318	5.39251	4.4895	4.4895	4.4895	4.4895	4.4895	4.4895	4.4895
ACA1_151240	OTU family cysteine protease	6.80117	5.69423	6.88161	4.4895	4.4895	4.4895	4.4895	4.4895	4.4895
ACA1_151270	hypothetical protein	4.78159	4.4895	4.4895	4.4895	4.4895	4.4895	4.4895	4.4895	4.4895
ACA1_151280	Peroxin-3 protein	6.1192	5.69423	4.4895	4.4895	4.4895	4.4895	4.4895	4.4895	4.4895
ACA1_151300	TIM21 protein	5.52318	5.94363	5.1739	4.4895	4.4895	4.4895	4.4895	4.4895	4.4895
ACA1_151500	Ras subfamily protein	4.86714	5.01053	4.4895	4.4895	4.4895	4.4895	4.4895	4.4895	4.4895
ACA1_152200	Ras subfamily protein	4.86714	4.4895	5.1739	4.4895	4.4895	4.4895	4.4895	4.4895	4.4895
ACA1_152430	Fbox domain containing protein	4.69064	4.4895	4.4895	4.4895	4.4895	4.4895	4.4895	4.4895	4.4895
ACA1_152980	slime mold cyclic amp receptor prote	4.78159	4.4895	4.4895	4.4895	4.4895	4.4895	4.4895	4.4895	4.4895
ACA1_153000	hypothetical protein	6.1192	5.94363	5.1739	4.4895	4.4895	4.4895	4.4895	4.4895	4.4895
ACA1_153010	hypothetical protein	4.86714	5.01053	4.4895	4.4895	4.4895	4.4895	4.4895	4.4895	4.4895
ACA1_153020	ubiquitin carrier protein	5.71999	5.39251	5.1739	4.4895	4.4895	4.4895	4.4895	4.4895	4.4895
ACA1_153050	hypothetical protein	5.02438	4.4895	5.1739	4.4895	4.4895	4.4895	4.4895	4.4895	4.4895
ACA1_153210	0	5.09701	5.39251	4.4895	4.4895	4.4895	4.4895	4.4895	4.4895	4.4895
ACA1_153220	hypothetical protein	4.86714	4.4895	4.4895	4.4895	4.4895	4.4895	4.4895	4.4895	4.4895
ACA1_153530	SAM domain (Sterile alpha motif) domain containing protein	6.75702	6.65295	5.6362	4.4895	4.4895	4.4895	4.4895	4.4895	4.4895
ACA1_153580	hypothetical protein	4.78159	4.4895	5.1739	4.4895	4.4895	4.4895	4.4895	4.4895	4.4895
ACA1_153590	hypothetical protein	5.57496	5.01053	4.4895	4.4895	4.4895	4.4895	4.4895	4.4895	4.4895
ACA1_153600	tRNA pseudouridine synthase A, put	6.48666	7.02176	6.26693	4.4895	4.4895	4.4895	4.4895	4.4895	4.4895
ACA1_153630	OTUlike cysteine protease family protein	5.52318	5.39251	5.1739	4.4895	4.4895	4.4895	4.4895	4.4895	4.4895
ACA1_153710	hypothetical protein	5.29523	5.39251	4.4895	4.4895	4.4895	4.4895	4.4895	4.4895	4.4895
ACA1_153830	RNA binding, putative	13.058	13.1298	15.0129	14.6541	15.2349	15.682	15.5357	15.6854	15.6675
ACA1_153940	hypothetical protein	4.78159	4.4895	4.4895	4.4895	4.4895	4.4895	4.4895	4.4895	4.4895
ACA1_154180	shortchain dehydrogenase/reductase SDR, putative	4.69064	4.4895	4.4895	4.4895	4.4895	4.4895	4.4895	4.4895	4.4895
ACA1_154410	hypothetical protein	4.86714	4.4895	4.4895	4.4895	4.4895	4.4895	4.4895	4.4895	4.4895
ACA1_154540	alcohol dehydrogenase, zinccontaining, putative	5.85176	6.50559	5.6362	4.4895	4.4895	4.4895	4.4895	4.4895	4.4895
ACA1_154560	class II glutamine amidotransferase domain containing protein	4.9479	5.01053	4.4895	4.4895	4.4895	4.4895	4.4895	4.4895	4.4895
ACA1_154690	Fbox domain containing protein	6.04771	5.39251	5.1739	4.4895	4.4895	4.4895	4.4895	4.4895	4.4895
ACA1_154720	SNARE domain containing protein	5.80916	5.39251	4.4895	4.4895	4.4895	4.4895	4.4895	4.4895	4.4895
ACA1_154730	protein kinase domain contain	5.41371	6.50559	5.6362	4.4895	4.4895	4.4895	4.4895	4.4895	4.4895
ACA1_154840	mitogen-activated protein kinase kinase kinase	5.71999	5.39251	5.1739	4.4895	4.4895	4.4895	4.4895	4.4895	4.4895
ACA1_154950	hypothetical protein	4.78159	4.4895	4.4895	4.4895	4.4895	4.4895	4.4895	4.4895	4.4895
ACA1_155070	methyltransferase domain containing protein	5.02438	5.01053	4.4895	4.4895	4.4895	4.4895	4.4895	4.4895	4.4895
ACA1_155080	hypothetical protein	6.0839	4.4895	5.98576	4.4895	4.4895	4.4895	4.4895	4.4895	4.4895
ACA1_155120	hypothetical protein	4.59358	4.4895	4.4895	4.4895	4.4895	4.4895	4.4895	4.4895	4.4895
ACA1_155130	RhoGEF domain containing protein	5.71999	5.94363	5.98576	4.4895	4.4895	4.4895	4.4895	4.4895	4.4895
ACA1_155180	saposin B domain containing protein	4.59358	4.4895	4.4895	4.4895	4.4895	4.4895	4.4895	4.4895	4.4895
ACA1_155190	NAD dependent epimerase/dehydratase superfamily protein	5.02438	5.01053	5.6362	4.4895	4.4895	4.4895	4.4895	4.4895	4.4895
ACA1_155230	hypothetical protein	6.94583	6.50559	6.26693	4.4895	4.4895	4.4895	4.4895	4.4895	4.4895
ACA1_155300	receptor protein-tyrosine kinase	4.86714	4.4895	4.4895	4.4895	4.4895	4.4895	4.4895	4.4895	4.4895
ACA1_155480	ubiquitin conjugating enzyme, putative	10.8234	9.83231	9.80602	9.27968	9.40022	10.8576	9.79076	10.691	9.40272
ACA1_155640	vacuolar sorting protein 9 (vps9) doma	5.93336	5.69423	6.50213	4.4895	4.4895	4.4895	4.4895	4.4895	4.4895
ACA1_155670	SPRY domain containing protein	6.43155	5.94363	5.6362	4.4895	4.4895	4.4895	4.4895	4.4895	4.4895
ACA1_155680	hypothetical protein	4.69064	4.4895	4.4895	4.4895	4.4895	4.4895	4.4895	4.4895	4.4895
ACA1_155690	NADP oxidoreductase coenzyme F420-dependent	5.85176	6.34145	5.98576	4.4895	4.4895	4.4895	4.4895	4.4895	4.4895
ACA1_155760	phosphoribosyltransferase	4.59358	4.4895	5.1739	4.4895	4.4895	4.4895	4.4895	4.4895	4.4895
ACA1_155790	hypothetical protein	5.67324	5.39251	4.4895	4.4895	4.4895	4.4895	4.4895	4.4895	4.4895
ACA1_156720	dioxygenase subfamily protein	6.1192	5.94363	5.6362	4.4895	4.4895	4.4895	4.4895	4.4895	4.4895
ACA1_156740	hypothetical protein	4.59358	4.4895	4.4895	4.4895	4.4895	4.4895	4.4895	4.4895	4.4895
ACA1_157200	zinc transporter ZupT, putative	4.9479	5.39251	4.4895	4.4895	4.4895	4.4895	4.4895	4.4895	4.4895
ACA1_157250	tRNA pseudouridine synthase D, putati	11.4846	11.5707	13.1017	12.6909	13.9973	13.9576	13.9257	14.0096	13.714
ACA1_157260	hypothetical protein	5.52318	5.01053	4.4895	4.4895	4.4895	4.4895	4.4895	4.4895	4.4895
ACA1_157290	ankyrin, putative	6.01059	6.15621	5.6362	4.4895	4.4895	4.4895	4.4895	4.4895	4.4895
ACA1_157480	Ras family protein	4.59358	4.4895	4.4895	4.4895	4.4895	4.4895	4.4895	4.4895	4.4895
ACA1_157590	hypothetical protein	5.02438	4.4895	4.4895	4.4895	4.4895	4.4895	4.4895	4.4895	4.4895
ACA1_157600	NmrAlike family protein	4.78159	5.39251	5.6362	4.4895	4.4895	4.4895	4.4895	4.4895	4.4895
ACA1_157740	rasrelated C3 botulinum toxin substrate 2, putative	5.35569	5.69423	5.1739	4.4895	4.4895	4.4895	4.4895	4.4895	4.4895
ACA1_157780	polysaccharide deacetylase domain containing protein	4.78159	5.39251	5.1739	4.4895	4.4895	4.4895	4.4895	4.4895	4.4895
ACA1_157830	NHL repeat-containing protein	4.69064	4.4895	4.4895	4.4895	4.4895	4.4895	4.4895	4.4895	4.4895
ACA1_157840	hypothetical protein	6.56556	5.94363	6.50213	4.4895	4.4895	4.4895	4.4895	4.4895	4.4895
ACA1_157850	endonuclease/exonuclease/phosphatase family protein	5.02438	4.4895	5.1739	4.4895	4.4895	4.4895	4.4895	4.4895	4.4895
ACA1_157880	ferredoxin/adrenodoxin reductase	5.62494	5.39251	5.6362	4.4895	4.4895	4.4895	4.4895	4.4895	4.4895
ACA1_157920	hypothetical protein	4.86714	5.01053	4.4895	4.4895	4.4895	4.4895	4.4895	4.4895	4.4895
ACA1_157970	hypothetical protein	5.16615	4.4895	5.1739	4.4895	4.4895	4.4895	4.4895	4.4895	4.4895
ACA1_158000	hypothetical protein	6.01059	5.69423	5.6362	4.4895	4.4895	4.4895	4.4895	4.4895	4.4895
ACA1_158210	hypothetical protein	4.78159	4.4895	4.4895	4.4895	4.4895	4.4895	4.4895	4.4895	4.4895
ACA1_158320	ATPbinding cassette, sub-family	5.16615	5.69423	4.4895	4.4895	4.4895	4.4895	4.4895	4.4895	4.4895
ACA1_158500	hydrolase nudix family protein	5.85176	6.34145	5.6362	4.4895	4.4895	4.4895	4.4895	4.4895	4.4895
ACA1_158900	hypothetical protein	4.78159	4.4895	4.4895	4.4895	4.4895	4.4895	4.4895	4.4895	4.4895
ACA1_158940	oxidoreductase	6.59093	6.50559	5.98576	4.4895	4.4895	4.4895	4.4895	4.4895	4.4895
ACA1_158990	hypothetical protein	5.23214	4.4895	4.4895	4.4895	4.4895	4.4895	4.4895	4.4895	4.4895
ACA1_159010	NmrAlike family protein	5.29523	5.39251	5.1739	4.4895	4.4895	4.4895	4.4895	4.4895	4.4895
ACA1_159030	peptidase, M28 family protein	5.23214	5.69423	5.6362	4.4895	4.4895	4.4895	4.4895	4.4895	4.4895
ACA1_159040	hypothetical protein	4.69064	5.01053	4.4895	4.4895	4.4895	4.4895	4.4895	4.4895	4.4895
ACA1_159160	hypothetical protein	6.43155	5.39251	5.1739	4.4895	4.4895	4.4895	4.4895	4.4895	4.4895
ACA1_159170	hypothetical protein	5.02438	5.39251	4.4895	4.4895	4.4895	4.4895	4.4895	4.4895	4.4895
ACA1_159180	hypothetical protein	5.02438	4.4895	5.1739	4.4895	4.4895	4.4895	4.4895	4.4895	4.4895
ACA1_159210	MYND finger domain containing protein	4.69064	4.4895	5.6362	4.4895	4.4895	4.4895	4.4895	4.4895	4.4895
ACA1_159550	poly(A)-specific ribonuclease, putativ	4.59358	4.4895	4.4895	4.4895	4.4895	4.4895	4.4895	4.4895	4.4895
ACA1_159810	hypothetical protein	5.16615	4.4895	4.4895	4.4895	4.4895	4.4895	4.4895	4.4895	4.4895
ACA1_160000	hypothetical protein	4.78159	5.01053	4.4895	4.4895	4.4895	4.4895	4.4895	4.4895	4.4895
ACA1_160010	hypothetical protein	4.59358	4.4895	4.4895	4.4895	4.4895	4.4895	4.4895	4.4895	4.4895
ACA1_160160	cellulose binding domain containing protein	4.86714	4.4895	4.4895	4.4895	4.4895	4.4895	4.4895	4.4895	4.4895
ACA1_160170	xanthine dehydrogenase	6.48666	6.78664	5.98576	4.4895	4.4895	4.4895	4.4895	4.4895	4.4895
ACA1_160390	hypothetical protein	5.02438	4.4895	4.4895	4.4895	4.4895	4.4895	4.4895	4.4895	4.4895
ACA1_160870	hypothetical protein	4.69064	4.4895	4.4895	4.4895	4.4895	4.4895	4.4895	4.4895	4.4895
ACA1_160880	clathrin adaptor complex small chain subfamily protein	5.46948	5.94363	5.1739	4.4895	4.4895	4.4895	4.4895	4.4895	4.4895
ACA1_161190	hypothetical protein	5.52318	5.39251	5.1739	4.4895	4.4895	4.4895	4.4895	4.4895	4.4895
ACA1_161300	hypothetical protein	4.86714	4.4895	4.4895	4.4895	4.4895	4.4895	4.4895	4.4895	4.4895
ACA1_161410	SPT2 chromatin protein	4.86714	5.01053	4.4895	4.4895	4.4895	4.4895	4.4895	4.4895	4.4895
ACA1_161630	LIM domain containing protein	5.52318	5.01053	5.6362	4.4895	4.4895	4.4895	4.4895	4.4895	4.4895
ACA1_161760	hypothetical protein	4.78159	5.01053	4.4895	4.4895	4.4895	4.4895	4.4895	4.4895	4.4895
ACA1_162550	regulator of chromosome condensati	4.78159	4.4895	4.4895	4.4895	4.4895	4.4895	4.4895	4.4895	4.4895
ACA1_162670	EF hand domain containing protein	4.69064	5.01053	4.4895	4.4895	4.4895	4.4895	4.4895	4.4895	4.4895
ACA1_162780	ankyrin repeat domain 50, putative	4.78159	4.4895	5.1739	4.4895	4.4895	4.4895	4.4895	4.4895	4.4895
ACA1_163110	hypothetical protein	5.16615	4.4895	4.4895	4.4895	4.4895	4.4895	4.4895	4.4895	4.4895
ACA1_163170	actin, putative	5.02438	5.39251	5.6362	4.4895	4.4895	4.4895	4.4895	4.4895	4.4895
ACA1_163180	hypothetical protein	4.78159	5.01053	4.4895	4.4895	4.4895	4.4895	4.4895	4.4895	4.4895
ACA1_163200	hypothetical protein	4.78159	4.4895	4.4895	4.4895	4.4895	4.4895	4.4895	4.4895	4.4895
ACA1_163210	hypothetical protein	4.69064	5.01053	5.1739	4.4895	4.4895	4.4895	4.4895	4.4895	4.4895
ACA1_163310	CBS domain containing protein	4.69064	4.4895	4.4895	4.4895	4.4895	4.4895	4.4895	4.4895	4.4895
ACA1_163360	Ras subfamily protein	5.23214	4.4895	4.4895	4.4895	4.4895	4.4895	4.4895	4.4895	4.4895
ACA1_163440	tetratricopeptide repeat domain containing protein	4.78159	5.01053	4.4895	4.4895	4.4895	4.4895	4.4895	4.4895	4.4895
ACA1_163620	hypothetical protein	4.59358	4.4895	4.4895	4.4895	4.4895	4.4895	4.4895	4.4895	4.4895
ACA1_163790	Oxidoreductase, 2OG-Fe(II) oxygenase family protein	4.9479	4.4895	5.1739	4.4895	4.4895	4.4895	4.4895	4.4895	4.4895
ACA1_163810	hypothetical protein	4.59358	4.4895	4.4895	4.4895	4.4895	4.4895	4.4895	4.4895	4.4895
ACA1_163830	C5 cytosine-specific DNA methyl	6.94583	7.02176	7.18178	4.4895	4.4895	4.4895	4.4895	4.4895	4.4895
ACA1_163850	TBC domain containing protein	5.23214	4.4895	4.4895	4.4895	4.4895	4.4895	4.4895	4.4895	4.4895
ACA1_163890	hypothetical protein	7.69557	8.38861	9.91192	9.27968	9.40022	9.30718	10.7724	8.83708	9.00355
ACA1_163980	hypothetical protein	5.62494	5.01053	4.4895	4.4895	4.4895	4.4895	4.4895	4.4895	4.4895
ACA1_163990	glycosyl hydrolases family 32 superfamily pr	5.80916	6.78664	5.98576	4.4895	4.4895	4.4895	4.4895	4.4895	4.4895
ACA1_164010	haloacid dehalogenase family hydrolase family protein	6.844	6.50559	6.26693	4.4895	4.4895	4.4895	4.4895	4.4895	4.4895
ACA1_164020	hypothetical protein	6.43155	6.15621	6.70431	4.4895	4.4895	4.4895	4.4895	4.4895	4.4895
ACA1_164030	Ankyrin repeatcontaining protein	5.29523	5.01053	4.4895	4.4895	4.4895	4.4895	4.4895	4.4895	4.4895
ACA1_164080	SGT1 protein	6.04771	5.69423	5.98576	4.4895	4.4895	4.4895	4.4895	4.4895	4.4895
ACA1_164130	hypothetical protein	6.0839	5.39251	4.4895	4.4895	4.4895	4.4895	4.4895	4.4895	4.4895
ACA1_164160	peptidase, M50 domain containing protein	5.71999	6.34145	6.26693	4.4895	4.4895	4.4895	4.4895	4.4895	4.4895
ACA1_164350	hypothetical protein	6.37426	6.15621	5.6362	4.4895	4.4895	4.4895	4.4895	4.4895	4.4895
ACA1_164360	hypothetical protein	4.59358	4.4895	4.4895	4.4895	4.4895	4.4895	4.4895	4.4895	4.4895
ACA1_164370	zinc finger domain containing protei	5.23214	5.01053	5.1739	4.4895	4.4895	4.4895	4.4895	4.4895	4.4895
ACA1_164390	carboxylesterase superfamily protein	5.62494	4.4895	4.4895	4.4895	4.4895	4.4895	4.4895	4.4895	4.4895
ACA1_164520	hypothetical protein	4.59358	4.4895	4.4895	4.4895	4.4895	4.4895	4.4895	4.4895	4.4895
ACA1_164810	hypothetical protein	5.62494	5.01053	5.6362	4.4895	4.4895	4.4895	4.4895	4.4895	4.4895
ACA1_165080	hypothetical protein	4.69064	4.4895	4.4895	4.4895	4.4895	4.4895	4.4895	4.4895	4.4895
ACA1_165390	F-box domain containing protein	5.16615	4.4895	4.4895	4.4895	4.4895	4.4895	4.4895	4.4895	4.4895
ACA1_165580	BTB/POZ domain containing protein	6.0839	5.94363	4.4895	4.4895	4.4895	4.4895	4.4895	4.4895	4.4895
ACA1_165600	hypothetical protein	6.28381	6.65295	5.6362	4.4895	4.4895	4.4895	4.4895	4.4895	4.4895
ACA1_165800	hypothetical protein	4.86714	4.4895	5.1739	4.4895	4.4895	4.4895	4.4895	4.4895	4.4895
ACA1_166100	WD domain, G-beta repeat-containing protein	4.9479	4.4895	4.4895	4.4895	4.4895	4.4895	4.4895	4.4895	4.4895
ACA1_166220	rRNA-processing protein EBP2, putative	5.02438	5.01053	4.4895	4.4895	4.4895	4.4895	4.4895	4.4895	4.4895
ACA1_166770	hypothetical protein	4.69064	4.4895	4.4895	4.4895	4.4895	4.4895	4.4895	4.4895	4.4895
ACA1_166990	hypothetical protein	4.86714	4.4895	4.4895	4.4895	4.4895	4.4895	4.4895	4.4895	4.4895
ACA1_167030	hypothetical protein	5.29523	5.39251	5.1739	4.4895	4.4895	4.4895	4.4895	4.4895	4.4895
ACA1_167080	hypothetical protein	4.78159	4.4895	4.4895	4.4895	4.4895	4.4895	4.4895	4.4895	4.4895
ACA1_167810	methyltransferase domain containing protein	4.69064	4.4895	4.4895	4.4895	4.4895	4.4895	4.4895	4.4895	4.4895
ACA1_168910	hypothetical protein	4.69064	4.4895	4.4895	4.4895	4.4895	4.4895	4.4895	4.4895	4.4895
ACA1_170210	hypothetical protein	4.9479	4.4895	5.1739	4.4895	4.4895	4.4895	4.4895	4.4895	4.4895
ACA1_170250	hypothetical protein	5.89313	5.01053	4.4895	4.4895	4.4895	4.4895	4.4895	4.4895	4.4895
ACA1_170300	hypothetical protein	5.09701	4.4895	5.6362	4.4895	4.4895	4.4895	4.4895	4.4895	4.4895
ACA1_170530	hypothetical protein	5.23214	5.01053	5.1739	4.4895	4.4895	4.4895	4.4895	4.4895	4.4895
ACA1_170640	serine/threoni	5.46948	4.4895	5.1739	4.4895	4.4895	4.4895	4.4895	4.4895	4.4895
ACA1_171240	ribosomal protein L7Ae protein	5.71999	5.01053	5.6362	4.4895	4.4895	4.4895	4.4895	4.4895	4.4895
ACA1_171270	hypothetical protein	5.46948	5.39251	4.4895	4.4895	4.4895	4.4895	4.4895	4.4895	4.4895
ACA1_171320	von Willebrand factor type A domain containing protein	4.86714	4.4895	5.1739	4.4895	4.4895	4.4895	4.4895	4.4895	4.4895
ACA1_171330	Nitrilase/cyanide hydratase and apolipoprotein Nacyltransferase	4.78159	5.01053	4.4895	4.4895	4.4895	4.4895	4.4895	4.4895	4.4895
ACA1_171380	COMM domain containing protein 8, putative	5.16615	5.01053	5.1739	4.4895	4.4895	4.4895	4.4895	4.4895	4.4895
ACA1_171400	ATPase/histidine kinase/DNA gyrase B/HSP90 domain containing protein	5.52318	4.4895	5.1739	4.4895	4.4895	4.4895	4.4895	4.4895	4.4895
ACA1_171410	FAD binding domain containing protein	4.59358	4.4895	4.4895	4.4895	4.4895	4.4895	4.4895	4.4895	4.4895
ACA1_171450	PeptidyltRNA hydrolase	9.59852	9.83231	9.54143	9.27968	9.40022	9.30718	9.79076	9.51	9.00355
ACA1_171480	hypothetical protein	5.35569	5.01053	5.1739	4.4895	4.4895	4.4895	4.4895	4.4895	4.4895
ACA1_171670	oxidoreductase, FADbinding family protein	6.48666	6.15621	5.98576	4.4895	4.4895	4.4895	4.4895	4.4895	4.4895
ACA1_171730	hypothetical protein	4.78159	5.01053	4.4895	4.4895	4.4895	4.4895	4.4895	4.4895	4.4895
ACA1_171810	zinc finger, C3HC4 type (RING f	4.59358	4.4895	4.4895	4.4895	4.4895	4.4895	4.4895	4.4895	4.4895
ACA1_171930	hypothetical protein	6.01059	5.69423	5.6362	4.4895	4.4895	4.4895	4.4895	4.4895	4.4895
ACA1_171940	hypothetical protein	4.69064	4.4895	4.4895	4.4895	4.4895	4.4895	4.4895	4.4895	4.4895
ACA1_171950	hypothetical protein	4.86714	5.01053	4.4895	4.4895	4.4895	4.4895	4.4895	4.4895	4.4895
ACA1_171960	hypothetical protein	5.41371	4.4895	5.1739	4.4895	4.4895	4.4895	4.4895	4.4895	4.4895
ACA1_171970	hypothetical protein	5.35569	4.4895	4.4895	4.4895	4.4895	4.4895	4.4895	4.4895	4.4895
ACA1_172010	hypothetical protein	5.46948	4.4895	5.1739	4.4895	4.4895	4.4895	4.4895	4.4895	4.4895
ACA1_172050	hypothetical protein	5.02438	4.4895	4.4895	4.4895	4.4895	4.4895	4.4895	4.4895	4.4895
ACA1_172070	RIC1 protein	6.37426	5.94363	6.26693	4.4895	4.4895	4.4895	4.4895	6.26343	4.4895
ACA1_172080	GRAM domain containing protein	5.09701	5.01053	4.4895	4.4895	4.4895	4.4895	4.4895	4.4895	4.4895
ACA1_172120	hypothetical protein	4.59358	4.4895	4.4895	4.4895	4.4895	4.4895	4.4895	4.4895	4.4895
ACA1_172210	hypothetical protein	5.93336	6.65295	5.6362	4.4895	4.4895	4.4895	4.4895	4.4895	4.4895
ACA1_172240	hypothetical protein	4.86714	4.4895	4.4895	4.4895	4.4895	4.4895	4.4895	4.4895	4.4895
ACA1_172370	hypothetical protein	4.59358	4.4895	4.4895	4.4895	4.4895	4.4895	4.4895	4.4895	4.4895
ACA1_172490	hypothetical protein	4.69064	4.4895	4.4895	4.4895	4.4895	4.4895	4.4895	4.4895	4.4895
ACA1_172600	hypothetical protein	4.69064	4.4895	4.4895	4.4895	4.4895	4.4895	4.4895	4.4895	4.4895
ACA1_172730	PKD domain containing protein	5.16615	4.4895	4.4895	4.4895	4.4895	4.4895	4.4895	4.4895	4.4895
ACA1_172740	oxidoreductase, zincbinding dehydrogenase superfamily protein	5.16615	4.4895	5.1739	4.4895	4.4895	4.4895	4.4895	4.4895	4.4895
ACA1_172770	domain found in dishevelled, egl10, and pleckstrin domain containing prote	5.29523	5.01053	5.98576	4.4895	4.4895	4.4895	4.4895	4.4895	4.4895
ACA1_172860	20beta-hydroxysteroid dehy	6.28381	5.39251	5.1739	4.4895	4.4895	4.4895	4.4895	4.4895	4.4895
ACA1_172920	hypothetical protein	6.90596	6.34145	6.26693	4.4895	4.4895	4.4895	4.4895	6.26343	4.4895
ACA1_172940	protein kinase domain containing protein	5.85176	5.94363	5.1739	4.4895	4.4895	4.4895	4.4895	4.4895	4.4895
ACA1_172980	hypothetical protein	4.59358	4.4895	4.4895	4.4895	4.4895	4.4895	4.4895	4.4895	4.4895
ACA1_173000	hypothetical protein	4.69064	4.4895	4.4895	4.4895	4.4895	4.4895	4.4895	4.4895	4.4895
ACA1_173120	leucine rich repeat domain containing protein	4.86714	4.4895	4.4895	4.4895	4.4895	4.4895	4.4895	4.4895	4.4895
ACA1_173140	silent information regulator protein Sir2, putative	5.35569	5.01053	5.1739	4.4895	4.4895	4.4895	4.4895	4.4895	4.4895
ACA1_173150	hypothetical protein	5.71999	5.01053	5.1739	4.4895	4.4895	4.4895	4.4895	4.4895	4.4895
ACA1_173200	hypothetical protein	4.9479	4.4895	5.6362	4.4895	4.4895	4.4895	4.4895	4.4895	4.4895
ACA1_173230	hypothetical protein	5.29523	5.01053	5.1739	4.4895	4.4895	4.4895	4.4895	4.4895	4.4895
ACA1_173250	C2 domain containing protein	4.69064	4.4895	4.4895	4.4895	4.4895	4.4895	4.4895	4.4895	4.4895
ACA1_173260	Fbox domain/WD domain, G-beta repeat-containing p	5.46948	5.01053	4.4895	4.4895	4.4895	4.4895	4.4895	4.4895	4.4895
ACA1_173280	hypothetical protein	5.29523	4.4895	4.4895	4.4895	4.4895	4.4895	4.4895	4.4895	4.4895
ACA1_173290	UBX domain containing protein	5.41371	5.01053	5.6362	4.4895	4.4895	4.4895	4.4895	4.4895	4.4895
ACA1_173300	hypothetical protein	5.09701	4.4895	5.1739	4.4895	4.4895	4.4895	4.4895	4.4895	4.4895
ACA1_173370	'chromo' (CHRromatin Organization MOdifier) domain containing protein	4.78159	4.4895	4.4895	4.4895	4.4895	4.4895	4.4895	4.4895	4.4895
ACA1_173650	HEAT repeat domain containing protein	6.01059	5.69423	5.1739	4.4895	4.4895	4.4895	4.4895	4.4895	4.4895
ACA1_173870	adaptin subfamily protein	6.68817	5.69423	5.6362	4.4895	4.4895	4.4895	4.4895	4.4895	4.4895
ACA1_173900	Fbox domain containing protein	5.46948	5.39251	4.4895	4.4895	4.4895	4.4895	4.4895	4.4895	4.4895
ACA1_173910	aimless RasGEF, putative	4.9479	5.01053	5.1739	4.4895	4.4895	4.4895	4.4895	4.4895	4.4895
ACA1_173920	hypothetical protein	4.59358	4.4895	4.4895	4.4895	4.4895	4.4895	4.4895	4.4895	4.4895
ACA1_173930	dual specificity phos	4.69064	4.4895	4.4895	4.4895	4.4895	4.4895	4.4895	4.4895	4.4895
ACA1_173940	SH3 domain containing protein	5.52318	4.4895	6.26693	4.4895	4.4895	4.4895	4.4895	4.4895	4.4895
ACA1_173980	OTU family cysteine protease	5.29523	4.4895	4.4895	4.4895	4.4895	4.4895	4.4895	4.4895	4.4895
ACA1_174050	hypothetical protein	5.52318	4.4895	4.4895	4.4895	4.4895	4.4895	4.4895	4.4895	4.4895
ACA1_174080	vesicle soluble NSF attachme	5.67324	5.01053	5.1739	4.4895	4.4895	4.4895	4.4895	4.4895	4.4895
ACA1_174170	glutathione Stransferase, C-terminal domai	11.9826	11.6118	11.5152	10.8295	9.40022	10.8576	9.79076	7.90626	9.00355
ACA1_174180	hypothetical protein	5.80916	5.01053	5.6362	4.4895	4.4895	4.4895	4.4895	4.4895	4.4895
ACA1_174200	Aga27A, putative	6.3146	6.65295	5.6362	4.4895	4.4895	4.4895	4.4895	4.4895	4.4895
ACA1_174220	TBC domain containing protein	5.76526	5.01053	5.98576	4.4895	4.4895	4.4895	4.4895	4.4895	4.4895
ACA1_174270	hypothetical protein	5.67324	4.4895	5.6362	4.4895	4.4895	4.4895	4.4895	4.4895	4.4895
ACA1_174300	hypothetical protein	4.9479	5.01053	4.4895	4.4895	4.4895	4.4895	4.4895	4.4895	4.4895
ACA1_174380	ubiquinone/menaquinone biosynth	5.16615	4.4895	5.1739	4.4895	4.4895	4.4895	4.4895	4.4895	4.4895
ACA1_174480	universal stress domain containing protein	5.02438	4.4895	5.98576	4.4895	4.4895	4.4895	4.4895	4.4895	4.4895
ACA1_174540	fucosylgalactoside 3-alpha-galactosyltransferase	5.09701	5.01053	5.1739	4.4895	4.4895	4.4895	4.4895	4.4895	4.4895
ACA1_174570	hypothetical protein	4.59358	4.4895	4.4895	4.4895	4.4895	4.4895	4.4895	4.4895	4.4895
ACA1_174600	vault protein inter-alpha-trypsin protein	7.2142	7.02176	6.70431	4.4895	4.4895	4.4895	4.4895	4.4895	4.4895
ACA1_174640	hypothetical protein	5.16615	4.4895	4.4895	4.4895	4.4895	4.4895	4.4895	4.4895	4.4895
ACA1_174660	hypothetical protein	5.67324	5.01053	4.4895	4.4895	4.4895	4.4895	4.4895	4.4895	4.4895
ACA1_174720	hypothetical protein	4.86714	5.01053	4.4895	4.4895	4.4895	4.4895	4.4895	4.4895	4.4895
ACA1_174750	zinc finger domain containing protein	6.45937	6.65295	6.50213	4.4895	4.4895	4.4895	4.4895	4.4895	4.4895
ACA1_174770	leucinezipper-like transcriptional	5.71999	4.4895	4.4895	4.4895	4.4895	4.4895	4.4895	4.4895	4.4895
ACA1_174880	cation transport domain containing protein	5.09701	4.4895	4.4895	4.4895	4.4895	4.4895	4.4895	4.4895	4.4895
ACA1_175060	vacuolar proton ATPase, putative	12.6685	12.5677	13.418	14.3156	13.5241	13.5058	13.9257	13.9061	14.2864
ACA1_175220	hypothetical protein	4.69064	4.4895	4.4895	4.4895	4.4895	4.4895	4.4895	4.4895	4.4895
ACA1_175280	alcohol dehydrogenase zinc-binding domain containing protein	5.93336	5.69423	5.98576	4.4895	4.4895	4.4895	4.4895	4.4895	4.4895
ACA1_175300	zinc knuckle domain containing protein	5.16615	4.4895	5.1739	4.4895	4.4895	4.4895	4.4895	4.4895	4.4895
ACA1_175330	hypothetical protein	6.53974	5.69423	5.6362	4.4895	4.4895	4.4895	4.4895	7.03539	7.53965
ACA1_175370	hypothetical protein	5.09701	4.4895	5.1739	4.4895	4.4895	4.4895	4.4895	4.4895	4.4895
ACA1_175400	sulfate adenylyltransferase	5.02438	4.4895	5.1739	4.4895	4.4895	4.4895	4.4895	4.4895	4.4895
ACA1_175420	hypothetical protein	5.80916	5.94363	5.1739	4.4895	4.4895	4.4895	4.4895	4.4895	4.4895
ACA1_175490	variant sh3 domain containing protein	5.02438	4.4895	4.4895	4.4895	4.4895	4.4895	4.4895	4.4895	4.4895
ACA1_175500	hypothetical protein	4.86714	4.4895	4.4895	4.4895	4.4895	4.4895	4.4895	4.4895	4.4895
ACA1_175520	KID repeat-containing protein	5.62494	4.4895	5.98576	4.4895	4.4895	4.4895	4.4895	4.4895	4.4895
ACA1_175540	ATPase, AAA domain containing protein	5.41371	5.39251	5.1739	4.4895	4.4895	4.4895	4.4895	4.4895	4.4895
ACA1_175560	hypothetical prote	5.09701	5.01053	5.6362	4.4895	4.4895	4.4895	4.4895	4.4895	4.4895
ACA1_175580	hypothetical protein	6.22021	6.15621	5.6362	4.4895	4.4895	4.4895	4.4895	4.4895	4.4895
ACA1_175600	hypothetical protein	5.09701	4.4895	5.1739	4.4895	4.4895	4.4895	4.4895	4.4895	4.4895
ACA1_175650	hypothetical protein	5.09701	4.4895	5.1739	4.4895	4.4895	4.4895	4.4895	4.4895	4.4895
ACA1_175660	hypothetical protein	5.02438	4.4895	5.1739	4.4895	4.4895	4.4895	4.4895	4.4895	4.4895
ACA1_175700	Frizzled/Smoothened family membrane region protein	4.78159	4.4895	5.1739	4.4895	4.4895	4.4895	4.4895	4.4895	4.4895
ACA1_175760	phosphoglycerate mutase family domain containing protein	5.80916	5.39251	5.1739	4.4895	4.4895	4.4895	4.4895	4.4895	4.4895
ACA1_175790	NADPHdependent FMN reductase d	5.23214	5.01053	4.4895	4.4895	4.4895	4.4895	4.4895	4.4895	4.4895
ACA1_175800	hypothetical protein	7.04094	6.50559	5.98576	4.4895	4.4895	4.4895	4.4895	4.4895	4.4895
ACA1_175880	hypothetical protein	4.78159	4.4895	4.4895	4.4895	4.4895	4.4895	4.4895	4.4895	4.4895
ACA1_175920	Ras subfamily protein	5.41371	4.4895	5.1739	4.4895	4.4895	4.4895	4.4895	4.4895	4.4895
ACA1_175930	hypothetical protein	5.62494	5.01053	5.1739	4.4895	4.4895	4.4895	4.4895	4.4895	4.4895
ACA1_176050	Poly(ADPribose) polymerase cat	7.2142	7.12636	6.26693	4.4895	4.4895	4.4895	4.4895	4.4895	4.4895
ACA1_176090	Sel1 repeatcontaining protein	4.9479	4.4895	4.4895	4.4895	4.4895	4.4895	4.4895	4.4895	4.4895
ACA1_176120	armadillo repeat containing 7 isoform 1 family protein	5.97249	5.39251	5.1739	4.4895	4.4895	4.4895	4.4895	4.4895	4.4895
ACA1_176170	Bicoidinteracting protein 3	6.48666	6.15621	5.6362	4.4895	4.4895	4.4895	4.4895	4.4895	4.4895
ACA1_176180	transporter, major facilitator superfamily superfamily protein	4.86714	4.4895	4.4895	4.4895	4.4895	4.4895	4.4895	4.4895	4.4895
ACA1_176520	hypothetical protein	4.59358	4.4895	4.4895	4.4895	4.4895	4.4895	4.4895	4.4895	4.4895
ACA1_177080	hypothetical protein	4.9479	5.01053	4.4895	4.4895	4.4895	4.4895	4.4895	4.4895	4.4895
ACA1_177400	hypothetical protein	5.02438	4.4895	4.4895	4.4895	4.4895	4.4895	4.4895	4.4895	4.4895
ACA1_177440	hypothetical protein	5.52318	5.39251	4.4895	4.4895	4.4895	4.4895	4.4895	4.4895	4.4895
ACA1_177510	hypothetical protein	4.59358	4.4895	5.1739	4.4895	4.4895	4.4895	4.4895	4.4895	4.4895
ACA1_177750	DENN (AEX-3) domain containing protein	5.09701	5.01053	5.1739	4.4895	4.4895	4.4895	4.4895	4.4895	4.4895
ACA1_177860	formin domain containing protein	4.86714	4.4895	4.4895	4.4895	4.4895	4.4895	4.4895	4.4895	4.4895
ACA1_177880	SH3 domain containing protein	6.01059	5.94363	4.4895	4.4895	4.4895	4.4895	4.4895	4.4895	4.4895
ACA1_177920	Rab GTPase domain containing protein	5.09701	5.01053	4.4895	4.4895	4.4895	4.4895	4.4895	4.4895	4.4895
ACA1_178070	Dedicator of cytokinesis	6.75702	6.34145	7.03949	4.4895	4.4895	4.4895	4.4895	6.26343	7.53965
ACA1_178350	regulator of chromosome condensation (RCC1) repeat domain containing prote	4.86714	4.4895	4.4895	4.4895	4.4895	4.4895	4.4895	4.4895	4.4895
ACA1_178470	hypothetical protein	6.43155	7.22388	6.88161	4.4895	4.4895	4.4895	4.4895	6.26343	7.53965
ACA1_178500	coppertranslocating P-type ATPase	6.18732	6.34145	6.26693	4.4895	4.4895	4.4895	4.4895	4.4895	4.4895
ACA1_178510	endonuclease/exonuclease/phosphatase family protein	6.04771	5.69423	5.6362	4.4895	4.4895	4.4895	4.4895	4.4895	4.4895
ACA1_178580	F-box domain containing p	5.02438	5.01053	4.4895	4.4895	4.4895	4.4895	4.4895	4.4895	4.4895
ACA1_178590	hypothetical protein	4.59358	4.4895	4.4895	4.4895	4.4895	4.4895	4.4895	4.4895	4.4895
ACA1_178730	histidine acid phosphatase superfamily protein	6.3146	6.34145	5.6362	4.4895	4.4895	4.4895	4.4895	4.4895	4.4895
ACA1_178760	hypothetical protein	5.16615	5.39251	5.1739	4.4895	4.4895	4.4895	4.4895	4.4895	4.4895
ACA1_178890	hypothetical protein	5.23214	5.01053	4.4895	4.4895	4.4895	4.4895	4.4895	4.4895	4.4895
ACA1_179000	hypothetical protein	4.59358	4.4895	4.4895	4.4895	4.4895	4.4895	4.4895	4.4895	4.4895
ACA1_179140	Ras subfamily protein	4.86714	4.4895	4.4895	4.4895	4.4895	4.4895	4.4895	4.4895	4.4895
ACA1_179170	hypothetical protein	4.9479	4.4895	4.4895	4.4895	4.4895	4.4895	4.4895	4.4895	4.4895
ACA1_180630	Peptide-aspartate beta-dioxygenase	5.67324	4.4895	5.6362	4.4895	4.4895	4.4895	4.4895	4.4895	4.4895
ACA1_180830	STAS domain containing protein	5.46948	5.94363	5.6362	4.4895	4.4895	4.4895	4.4895	4.4895	4.4895
ACA1_180940	sulfate permease subfamily protein	5.76526	5.94363	5.1739	4.4895	4.4895	4.4895	4.4895	4.4895	4.4895
ACA1_181380	hypothetical protein	4.59358	4.4895	4.4895	4.4895	4.4895	4.4895	4.4895	4.4895	4.4895
ACA1_181400	hypothetical protein	5.02438	5.69423	4.4895	4.4895	4.4895	4.4895	4.4895	4.4895	4.4895
ACA1_181520	cathepsin L, putative	4.78159	4.4895	4.4895	4.4895	4.4895	4.4895	4.4895	4.4895	4.4895
ACA1_181560	hypothetical protein	4.78159	4.4895	4.4895	4.4895	4.4895	4.4895	4.4895	4.4895	4.4895
ACA1_181620	hypothetical protein	5.02438	4.4895	4.4895	4.4895	4.4895	4.4895	4.4895	4.4895	4.4895
ACA1_181630	hypothetical protein	5.02438	5.69423	5.1739	4.4895	4.4895	4.4895	4.4895	4.4895	4.4895
ACA1_181850	hypothetical protein	5.09701	4.4895	5.6362	4.4895	4.4895	4.4895	4.4895	4.4895	4.4895
ACA1_181870	betatransducin repeat containing protein, putative	4.9479	4.4895	5.6362	4.4895	4.4895	4.4895	4.4895	4.4895	4.4895
ACA1_181890	Fbox domain containing protein	6.22021	5.94363	5.98576	4.4895	4.4895	4.4895	4.4895	4.4895	4.4895
ACA1_181900	hypothetical protein	5.09701	5.39251	5.1739	4.4895	4.4895	4.4895	4.4895	4.4895	4.4895
ACA1_182090	BTB/POZ domain containing p	5.80916	5.39251	5.6362	4.4895	4.4895	4.4895	4.4895	4.4895	4.4895
ACA1_182130	hypothetical protein	5.41371	5.94363	4.4895	4.4895	4.4895	4.4895	4.4895	4.4895	4.4895
ACA1_182150	hypothetical protein	5.09701	4.4895	4.4895	4.4895	4.4895	4.4895	4.4895	4.4895	4.4895
ACA1_182250	hypothetical protein	4.86714	4.4895	4.4895	4.4895	4.4895	4.4895	4.4895	4.4895	4.4895
ACA1_182350	carbamoylphosphate synthase, large subunit	6.18732	5.39251	5.6362	4.4895	4.4895	4.4895	4.4895	6.26343	4.4895
ACA1_182360	argininosuccinate lyase, putative	4.9479	4.4895	5.1739	4.4895	4.4895	4.4895	4.4895	4.4895	4.4895
ACA1_182830	ATPase/histidine kinase/DNA gyrase B/HSP90 domain containing protein	5.09701	4.4895	5.1739	4.4895	4.4895	4.4895	4.4895	4.4895	4.4895
ACA1_182860	ankyrin repeat protein, putative	5.35569	5.94363	5.6362	4.4895	4.4895	4.4895	4.4895	4.4895	4.4895
ACA1_182890	hypothetical protein	4.78159	4.4895	4.4895	4.4895	4.4895	4.4895	4.4895	4.4895	4.4895
ACA1_182960	rhodaneselike domain containing protei	6.43155	5.39251	5.98576	4.4895	4.4895	4.4895	4.4895	4.4895	4.4895
ACA1_183000	Hypothetical protein	4.9479	5.01053	4.4895	4.4895	4.4895	4.4895	4.4895	4.4895	4.4895
ACA1_183050	kelch repeat-containing protein	6.59093	5.94363	6.50213	4.4895	4.4895	4.4895	4.4895	4.4895	4.4895
ACA1_183070	cysteine synthase 2, putative	6.59093	5.94363	5.1739	4.4895	4.4895	4.4895	4.4895	4.4895	4.4895
ACA1_183090	hypothetical protein	5.16615	4.4895	5.1739	4.4895	4.4895	4.4895	4.4895	4.4895	4.4895
ACA1_183160	cytochrome p450 superfamily protein	6.71149	6.78664	6.26693	4.4895	4.4895	4.4895	4.4895	4.4895	4.4895
ACA1_183250	PhytanoylCoA dioxygenase (PhyH) superfamily protein	4.69064	4.4895	4.4895	4.4895	4.4895	4.4895	4.4895	4.4895	4.4895
ACA1_183300	hypothetical protein	6.28381	6.34145	5.6362	4.4895	4.4895	4.4895	4.4895	4.4895	4.4895
ACA1_183420	L-2-hydroxyglutarate dehydrogenase, mitochondrial precursor, putative	7.19778	7.12636	5.98576	4.4895	4.4895	4.4895	4.4895	4.4895	4.4895
ACA1_183440	transporter, major facilitator subfamily protein	5.89313	4.4895	4.4895	4.4895	4.4895	4.4895	4.4895	4.4895	4.4895
ACA1_183460	BTB/POZ domain containing protein	5.35569	5.01053	4.4895	4.4895	4.4895	4.4895	4.4895	4.4895	4.4895
ACA1_183590	ankyrin 2	4.9479	4.4895	4.4895	4.4895	4.4895	4.4895	4.4895	4.4895	4.4895
ACA1_183600	kinase, pfkB superfamily protein	5.93336	5.94363	5.98576	4.4895	4.4895	4.4895	4.4895	4.4895	4.4895
ACA1_183740	hypothetical protein	5.52318	5.94363	5.6362	4.4895	4.4895	4.4895	4.4895	4.4895	4.4895
ACA1_183770	acylCoA dehydrogenase, C-terminal domain containing protein	7.35413	7.31523	6.26693	4.4895	4.4895	4.4895	4.4895	4.4895	4.4895
ACA1_183910	glycerate kinase subfamily protein	5.67324	6.34145	5.98576	4.4895	4.4895	4.4895	4.4895	4.4895	4.4895
ACA1_183940	GTPase activating Rap/RanGAP domainlike 3, putative	5.23214	5.39251	5.98576	4.4895	4.4895	4.4895	4.4895	4.4895	4.4895
ACA1_183950	hypothetical protein	6.80117	6.65295	5.6362	4.4895	4.4895	4.4895	4.4895	4.4895	4.4895
ACA1_183970	hypothetical protein	5.23214	5.94363	4.4895	4.4895	4.4895	4.4895	4.4895	4.4895	4.4895
ACA1_184020	RHOD YceA domain containing protein	6.56556	5.69423	5.6362	4.4895	4.4895	4.4895	4.4895	4.4895	4.4895
ACA1_184070	hypothetical protein	4.69064	4.4895	4.4895	4.4895	4.4895	4.4895	4.4895	4.4895	4.4895
ACA1_184150	Myblike DNA-binding domain containing protein	4.86714	5.01053	5.6362	4.4895	4.4895	4.4895	4.4895	4.4895	4.4895
ACA1_184190	protein kinase domain containing protein	5.35569	5.39251	5.6362	4.4895	4.4895	4.4895	4.4895	4.4895	4.4895
ACA1_184250	SPFH domain / Band 7 domain containing protein	4.9479	4.4895	4.4895	4.4895	4.4895	4.4895	4.4895	4.4895	4.4895
ACA1_184260	Phytanoyl-CoA dioxygenase	5.35569	5.39251	4.4895	4.4895	4.4895	4.4895	4.4895	4.4895	4.4895
ACA1_184280	hypothetical protein	8.63364	8.1112	7.03949	4.4895	4.4895	4.4895	4.4895	6.26343	4.4895
ACA1_184300	ABC transporter, ATPbinding domain containing protein	4.86714	5.39251	5.1739	4.4895	4.4895	4.4895	4.4895	4.4895	4.4895
ACA1_184320	homeobox domain containing protein	4.59358	4.4895	4.4895	4.4895	4.4895	4.4895	4.4895	4.4895	4.4895
ACA1_184330	hypothetical protein	4.78159	4.4895	4.4895	4.4895	4.4895	4.4895	4.4895	4.4895	4.4895
ACA1_184370	fungal Zn(2)-Cys(6) binuclear cluster domain containing protein	4.86714	4.4895	5.1739	4.4895	4.4895	4.4895	4.4895	4.4895	4.4895
ACA1_184410	hypothetical protein	4.69064	4.4895	4.4895	4.4895	4.4895	4.4895	4.4895	4.4895	4.4895
ACA1_184430	Solu	7.33923	6.65295	5.98576	4.4895	4.4895	4.4895	4.4895	4.4895	4.4895
ACA1_184440	soluble guanylyl cyclase beta1	5.29523	4.4895	6.26693	4.4895	4.4895	4.4895	4.4895	4.4895	4.4895
ACA1_184470	hypothetical protein	4.78159	4.4895	4.4895	4.4895	4.4895	4.4895	4.4895	4.4895	4.4895
ACA1_184600	alpha-N-acetylglucosaminidase family p	5.41371	6.15621	6.26693	4.4895	4.4895	4.4895	4.4895	4.4895	4.4895
ACA1_184650	hypothetical protein	9.76379	9.38231	11.0234	10.2534	10.9529	11.2683	11.3511	11.5303	11.3664
ACA1_184730	hypothetical protein	12.86	12.3873	12.437	13.2299	12.6783	12.07	12.7584	13.1168	12.3602
ACA1_184740	hypothetical protein	5.93336	5.39251	5.1739	4.4895	4.4895	4.4895	4.4895	4.4895	4.4895
ACA1_184900	WD domain, Gbeta repeat domain containing protein	4.78159	4.4895	5.1739	4.4895	4.4895	4.4895	4.4895	4.4895	4.4895
ACA1_184910	hypothetical protein	5.29523	5.94363	5.6362	4.4895	4.4895	4.4895	4.4895	4.4895	4.4895
ACA1_184920	hypothetical protein	4.69064	4.4895	4.4895	4.4895	4.4895	4.4895	4.4895	4.4895	4.4895
ACA1_185040	hypothetical protein	5.23214	5.94363	5.1739	4.4895	4.4895	4.4895	4.4895	4.4895	4.4895
ACA1_185180	LIM domain containing protein	5.35569	5.01053	5.1739	4.4895	4.4895	4.4895	4.4895	4.4895	4.4895
ACA1_185710	hypothetical protein	4.9479	4.4895	4.4895	4.4895	4.4895	4.4895	4.4895	4.4895	4.4895
ACA1_185850	acetyltransferase, GNAT superfamily protein	4.59358	4.4895	4.4895	4.4895	4.4895	4.4895	4.4895	4.4895	4.4895
ACA1_185870	BTB/POZ domain containing protein	5.41371	5.39251	4.4895	4.4895	4.4895	4.4895	4.4895	4.4895	4.4895
ACA1_186020	hypothetical protein	4.69064	5.01053	5.1739	4.4895	4.4895	4.4895	4.4895	4.4895	4.4895
ACA1_186070	ATPase/histidine kinase/DNA gyrase B/HSP90 domain containing protein	5.09701	4.4895	4.4895	4.4895	4.4895	4.4895	4.4895	4.4895	4.4895
ACA1_186350	RhoGEF domain containing protein	4.69064	4.4895	4.4895	4.4895	4.4895	4.4895	4.4895	4.4895	4.4895
ACA1_186670	hypothetical protein	4.78159	4.4895	5.1739	4.4895	4.4895	4.4895	4.4895	4.4895	4.4895
ACA1_186700	ADPribosylation factor subfamily protein	5.89313	5.94363	6.50213	4.4895	4.4895	4.4895	4.4895	4.4895	4.4895
ACA1_186860	golgi family protein, putative	4.86714	4.4895	5.1739	4.4895	4.4895	4.4895	4.4895	4.4895	4.4895
ACA1_186890	hypothetical protein	4.59358	4.4895	4.4895	4.4895	4.4895	4.4895	4.4895	4.4895	4.4895
ACA1_187250	hypothetical protein	5.41371	5.01053	4.4895	4.4895	4.4895	4.4895	4.4895	4.4895	4.4895
ACA1_187260	hypothetical protein	4.86714	4.4895	5.1739	4.4895	4.4895	4.4895	4.4895	4.4895	4.4895
ACA1_187340	transporter, major facilitator subfamily protein	5.62494	5.39251	5.1739	4.4895	4.4895	4.4895	4.4895	4.4895	4.4895
ACA1_187350	hypothetical protein	4.59358	4.4895	4.4895	4.4895	4.4895	4.4895	4.4895	4.4895	4.4895
ACA1_187370	RNA ligase, T4 RnlA family protein	5.16615	5.39251	4.4895	4.4895	4.4895	4.4895	4.4895	4.4895	4.4895
ACA1_187380	hypothetical protein	4.69064	4.4895	4.4895	4.4895	4.4895	4.4895	4.4895	4.4895	4.4895
ACA1_187610	hypothetical protein	4.78159	5.01053	4.4895	4.4895	4.4895	4.4895	4.4895	4.4895	4.4895
ACA1_187730	hypothetical protein	4.69064	4.4895	4.4895	4.4895	4.4895	4.4895	4.4895	4.4895	4.4895
ACA1_188030	hypothetical protein	5.41371	5.94363	5.6362	4.4895	4.4895	4.4895	4.4895	4.4895	4.4895
ACA1_188050	isocitrate dehydrogenase, NADPdependent, pu	13.8668	13.2833	13.5068	12.2333	11.3638	12.8445	12.3449	10.374	10.1894
ACA1_188200	SCPlike extracellular subfamily protein	4.69064	4.4895	4.4895	4.4895	4.4895	4.4895	4.4895	4.4895	4.4895
ACA1_188220	hypothetical protein	5.67324	5.94363	5.6362	4.4895	4.4895	4.4895	4.4895	4.4895	4.4895
ACA1_188250	GATA zinc finger domain containing protein	4.78159	4.4895	4.4895	4.4895	4.4895	4.4895	4.4895	4.4895	4.4895
ACA1_188310	hypothetical protein	5.23214	4.4895	5.1739	4.4895	4.4895	4.4895	4.4895	4.4895	4.4895
ACA1_188510	PH domain containing protein	5.52318	5.01053	5.1739	4.4895	4.4895	4.4895	4.4895	4.4895	4.4895
ACA1_188570	golgi family protei	4.86714	5.01053	5.1739	4.4895	4.4895	4.4895	4.4895	4.4895	4.4895
ACA1_189300	hypothetical protein	4.86714	4.4895	4.4895	4.4895	4.4895	4.4895	4.4895	4.4895	4.4895
ACA1_189390	hypothetical protein	5.57496	5.01053	4.4895	4.4895	4.4895	4.4895	4.4895	4.4895	4.4895
ACA1_189410	BTB/POZ domain containing protein	6.0839	5.39251	5.1739	4.4895	4.4895	4.4895	4.4895	4.4895	4.4895
ACA1_189440	von Willebrand factor type A domain containing protein	6.28381	6.50559	6.26693	4.4895	4.4895	4.4895	4.4895	4.4895	4.4895
ACA1_189590	transcriptional regulatorrelated, putativ	9.49482	9.44433	9.80602	10.8295	10.376	11.8489	10.7724	10.374	10.5458
ACA1_189870	DEAD/DEAH box helicase domain containing protein	5.09701	4.4895	4.4895	4.4895	4.4895	4.4895	4.4895	4.4895	4.4895
ACA1_189880	hypothetical protein	6.94583	6.15621	5.6362	4.4895	4.4895	4.4895	4.4895	4.4895	4.4895
ACA1_190000	glycosyltransferase, group 1 domain containing protein	5.09701	5.01053	4.4895	4.4895	4.4895	4.4895	4.4895	4.4895	4.4895
ACA1_190060	TM2 domain containing protein	4.59358	4.4895	4.4895	4.4895	4.4895	4.4895	4.4895	4.4895	4.4895
ACA1_190070	Synapsin, ATP binding domain containing protein	5.16615	5.01053	5.1739	4.4895	4.4895	4.4895	4.4895	4.4895	4.4895
ACA1_190390	NADbinding domain 4 domain containing protein	4.78159	5.01053	5.1739	4.4895	4.4895	4.4895	4.4895	4.4895	4.4895
ACA1_190400	RasGEF domain containing protein	5.35569	5.69423	5.98576	4.4895	4.4895	4.4895	4.4895	4.4895	4.4895
ACA1_190770	RhoGAP domain containing protein	6.37426	6.15621	6.88161	4.4895	4.4895	4.4895	4.4895	4.4895	4.4895
ACA1_191480	CS domain containing protein	7.70722	7.40113	8.39271	9.27968	10.9529	11.5876	11.7631	12.7803	13.2642
ACA1_191710	hypothetical protein	4.86714	4.4895	4.4895	4.4895	4.4895	4.4895	4.4895	4.4895	4.4895
ACA1_191890	hypothetical protein	4.69064	5.01053	4.4895	4.4895	4.4895	4.4895	4.4895	4.4895	4.4895
ACA1_192600	ganglioside gm2 activator precursor, putative	5.71999	5.94363	5.1739	4.4895	4.4895	4.4895	4.4895	4.4895	4.4895
ACA1_192620	hypothetical protein	4.69064	4.4895	4.4895	4.4895	4.4895	4.4895	4.4895	4.4895	4.4895
ACA1_192980	hypothetical protein	4.78159	5.01053	4.4895	4.4895	4.4895	4.4895	4.4895	4.4895	4.4895
ACA1_193120	hypothetical protein	5.23214	5.69423	5.1739	4.4895	4.4895	4.4895	4.4895	4.4895	4.4895
ACA1_193150	Serine/threonine protein phosphatase	5.76526	5.39251	4.4895	4.4895	4.4895	4.4895	4.4895	4.4895	4.4895
ACA1_193230	macro domain containing protein	6.34474	6.15621	5.6362	4.4895	4.4895	4.4895	4.4895	4.4895	4.4895
ACA1_193300	sterol 24c-methyltransferase	13.4776	13.7182	14.1353	14.7196	13.7461	13.2584	13.0794	12.0389	12.1684
ACA1_193340	Mpv17 / PMP22 family protein	4.59358	4.4895	4.4895	4.4895	4.4895	4.4895	4.4895	4.4895	4.4895
ACA1_194280	hypothetical protein	4.9479	5.01053	4.4895	4.4895	4.4895	4.4895	4.4895	4.4895	4.4895
ACA1_194860	hypothetical protein	4.78159	4.4895	4.4895	4.4895	4.4895	4.4895	4.4895	4.4895	4.4895
ACA1_194870	multiple CXCXC repeat domain containing protein	4.78159	4.4895	4.4895	4.4895	4.4895	4.4895	4.4895	4.4895	4.4895
ACA1_194940	hypothetical protein	6.98463	5.94363	5.1739	4.4895	4.4895	4.4895	4.4895	4.4895	4.4895
ACA1_195050	CyclinC, putative	4.9479	5.01053	4.4895	4.4895	4.4895	4.4895	4.4895	4.4895	4.4895
ACA1_195060	hypothetical protein	9.33884	8.62119	9.07851	9.27968	10.376	10.2814	10.7724	9.71052	9.40272
ACA1_195270	hypothetical protein	4.59358	4.4895	4.4895	4.4895	4.4895	4.4895	4.4895	4.4895	4.4895
ACA1_195530	Zn-finger in Ran binding protein and others domain containing protein	5.09701	5.39251	5.1739	4.4895	4.4895	4.4895	4.4895	4.4895	4.4895
ACA1_195560	RIO1 family/Rio2, Nterminal domain containing protein	6.77927	6.15621	5.6362	4.4895	4.4895	4.4895	4.4895	4.4895	4.4895
ACA1_195960	RFX DNA-binding domain containing protein	4.59358	4.4895	4.4895	4.4895	4.4895	4.4895	4.4895	4.4895	4.4895
ACA1_196080	protein kinase domain containing protein	5.35569	5.69423	5.98576	4.4895	4.4895	4.4895	4.4895	4.4895	4.4895
ACA1_196960	nitrate reductase (NADH), putative	5.02438	5.01053	4.4895	4.4895	4.4895	4.4895	4.4895	4.4895	4.4895
ACA1_197290	hypothetical protein	4.9479	4.4895	4.4895	4.4895	4.4895	4.4895	4.4895	4.4895	4.4895
ACA1_197320	hypothetical protein	4.69064	4.4895	5.1739	4.4895	4.4895	4.4895	4.4895	4.4895	4.4895
ACA1_197460	hypothetical protein	4.9479	5.01053	4.4895	4.4895	4.4895	4.4895	4.4895	4.4895	4.4895
ACA1_197610	hypothetical protein	6.48666	6.34145	6.26693	4.4895	4.4895	4.4895	4.4895	4.4895	4.4895
ACA1_197840	hypothetical protein	5.52318	5.39251	5.1739	4.4895	4.4895	4.4895	4.4895	4.4895	4.4895
ACA1_198250	hypothetical protein	5.57496	5.01053	5.6362	4.4895	4.4895	4.4895	4.4895	4.4895	4.4895
ACA1_198330	Iglike, group 2, putative	4.86714	4.4895	4.4895	4.4895	4.4895	4.4895	4.4895	4.4895	4.4895
ACA1_198430	RasGEF domain containing protein	5.23214	5.01053	5.98576	4.4895	4.4895	4.4895	4.4895	4.4895	4.4895
ACA1_198480	t	7.05924	5.94363	5.6362	4.4895	4.4895	4.4895	4.4895	4.4895	4.4895
ACA1_198570	COP9 signalosome complex subunit 4, putative	11.4581	10.5674	11.4107	11.24	10.376	10.2814	10.7724	10.1848	10.8314
ACA1_198830	vitamin k epoxide reductase family protein	5.46948	5.01053	4.4895	4.4895	4.4895	4.4895	4.4895	4.4895	4.4895
ACA1_198990	hypothetical protein	4.9479	4.4895	4.4895	4.4895	4.4895	4.4895	4.4895	4.4895	4.4895
ACA1_199050	pentatricopeptide repeat domain containing protein	5.57496	5.94363	4.4895	4.4895	4.4895	4.4895	4.4895	4.4895	4.4895
ACA1_199080	PPR repeat-containing protein	5.62494	5.94363	5.1739	4.4895	4.4895	4.4895	4.4895	4.4895	4.4895
ACA1_199290	RhoGAP domain containing protein	6.80117	5.94363	5.6362	4.4895	4.4895	4.4895	4.4895	4.4895	4.4895
ACA1_199340	BRCA1 C Terminus (BRCT) domain containing protein	5.02438	5.01053	5.98576	4.4895	4.4895	4.4895	4.4895	4.4895	4.4895
ACA1_199370	hypothetical protein	6.53974	6.50559	4.4895	4.4895	4.4895	4.4895	4.4895	6.26343	4.4895
ACA1_199550	DNA cross-link repair protein, putative	6.25236	5.69423	5.98576	4.4895	4.4895	4.4895	4.4895	4.4895	4.4895
ACA1_199660	hypothetical protein	5.46948	4.4895	4.4895	4.4895	4.4895	4.4895	4.4895	4.4895	4.4895
ACA1_200030	hypothetical protein	4.78159	4.4895	5.1739	4.4895	4.4895	4.4895	4.4895	4.4895	4.4895
ACA1_200370	Fbox domain containing protein	5.89313	5.69423	5.6362	4.4895	4.4895	4.4895	4.4895	4.4895	4.4895
ACA1_200400	glycoside hydrolase family protein	4.86714	5.39251	4.4895	4.4895	4.4895	4.4895	4.4895	4.4895	4.4895
ACA1_200430	elongation factor 1-alpha, putative	14.6514	15.629	15.0206	14.1825	14.1606	13.6499	13.756	13.3525	14.2261
ACA1_200550	protein kinase domain containing protein	4.78159	4.4895	5.1739	4.4895	4.4895	4.4895	4.4895	4.4895	4.4895
ACA1_200690	calcium binding atopyrelated autoantigen 1	5.02438	4.4895	4.4895	4.4895	4.4895	4.4895	4.4895	4.4895	4.4895
ACA1_201040	hypothetical protein	4.69064	4.4895	4.4895	4.4895	4.4895	4.4895	4.4895	4.4895	4.4895
ACA1_201050	hypothetical protein	4.59358	4.4895	5.1739	4.4895	4.4895	4.4895	4.4895	4.4895	4.4895
ACA1_201140	hypothetical protein	4.69064	4.4895	4.4895	4.4895	4.4895	4.4895	4.4895	4.4895	4.4895
ACA1_201200	Ras subfamily protein	4.86714	5.01053	5.1739	4.4895	4.4895	4.4895	4.4895	4.4895	4.4895
ACA1_201330	hypothetical protein	4.78159	5.01053	5.1739	4.4895	4.4895	4.4895	4.4895	4.4895	4.4895
ACA1_201360	regulator of chromosome condensation (RCC1) repeat domain containing prote	5.35569	5.39251	5.6362	4.4895	4.4895	4.4895	4.4895	4.4895	4.4895
ACA1_201530	polysaccharide lyase family 8, supersandwich subfamily protein	4.9479	4.4895	5.1739	4.4895	4.4895	4.4895	4.4895	4.4895	4.4895
ACA1_201590	ankyrin repeat-containing protein	5.71999	5.39251	5.1739	4.4895	4.4895	4.4895	4.4895	4.4895	4.4895
ACA1_201600	hypothetical protein	4.78159	4.4895	4.4895	4.4895	4.4895	4.4895	4.4895	4.4895	4.4895
ACA1_201610	hypothetical protein	4.69064	4.4895	4.4895	4.4895	4.4895	4.4895	4.4895	4.4895	4.4895
ACA1_201640	hypothetical protein	4.69064	4.4895	4.4895	4.4895	4.4895	4.4895	4.4895	4.4895	4.4895
ACA1_201660	DEADbox ATP-dependent RNA helicase	8.26734	7.55897	9.37364	10.2534	9.40022	10.8576	9.79076	9.14476	10.5458
ACA1_201670	DNAJ heat shock domain containing protein	5.41371	5.39251	4.4895	4.4895	4.4895	4.4895	4.4895	4.4895	4.4895
ACA1_202230	hypothetical protein	4.59358	4.4895	4.4895	4.4895	4.4895	4.4895	4.4895	4.4895	4.4895
ACA1_202370	protein kinase domain containing protein	5.35569	4.4895	5.98576	4.4895	4.4895	4.4895	4.4895	4.4895	4.4895
ACA1_202420	hypothetical protein	5.35569	5.01053	5.6362	4.4895	4.4895	4.4895	4.4895	4.4895	4.4895
ACA1_202470	GRAM domain containing protein	5.71999	5.01053	5.1739	4.4895	4.4895	4.4895	4.4895	4.4895	4.4895
ACA1_202660	hypothetical protein	4.59358	4.4895	4.4895	4.4895	4.4895	4.4895	4.4895	4.4895	4.4895
ACA1_202720	hypothetical protein	4.78159	4.4895	4.4895	4.4895	4.4895	4.4895	4.4895	4.4895	4.4895
ACA1_202740	Myblike DNA-binding domain containing protein	6.94583	6.50559	6.26693	4.4895	4.4895	4.4895	4.4895	4.4895	4.4895
ACA1_203000	hypothetical protein	6.86495	6.34145	5.98576	4.4895	4.4895	4.4895	4.4895	4.4895	4.4895
ACA1_203100	Helixloop-helix DNA-binding domain containing protein	4.59358	4.4895	4.4895	4.4895	4.4895	4.4895	4.4895	4.4895	4.4895
ACA1_203670	DnaJ domain containing protein	4.69064	4.4895	4.4895	4.4895	4.4895	4.4895	4.4895	4.4895	4.4895
ACA1_203680	Cofilin/tropomyosin-type actin-binding protein	4.86714	5.01053	4.4895	4.4895	4.4895	4.4895	4.4895	4.4895	4.4895
ACA1_203720	E1E2 ATPase subfa	4.69064	5.01053	5.1739	4.4895	4.4895	4.4895	4.4895	4.4895	4.4895
ACA1_203910	HEC/Ndc80p family protein	7.49517	6.78664	6.26693	4.4895	4.4895	4.4895	4.4895	4.4895	4.4895
ACA1_203920	Rap/ran-GAP protein	4.78159	4.4895	4.4895	4.4895	4.4895	4.4895	4.4895	4.4895	4.4895
ACA1_203970	HECTdomain (ubiquitin-transferase)	5.85176	5.39251	5.98576	4.4895	4.4895	4.4895	4.4895	6.26343	7.53965
ACA1_204040	mutanase	5.71999	5.39251	5.6362	4.4895	4.4895	4.4895	4.4895	4.4895	4.4895
ACA1_204060	hypothetical protein	5.16615	5.39251	5.1739	4.4895	4.4895	4.4895	4.4895	4.4895	4.4895
ACA1_204120	RNA polymerase Rpb1 protei	10.325	10.2692	9.82783	10.2534	11.3638	11.2683	9.79076	9.71052	10.1894
ACA1_204610	BTB/POZ domain containing protein	4.78159	5.39251	4.4895	4.4895	4.4895	4.4895	4.4895	4.4895	4.4895
ACA1_205670	WD domain, Gbeta repeat domain containing protein	4.9479	5.01053	4.4895	4.4895	4.4895	4.4895	4.4895	4.4895	4.4895
ACA1_205780	hypothetical protein	4.59358	4.4895	4.4895	4.4895	4.4895	4.4895	4.4895	4.4895	4.4895
ACA1_205980	ankyrin 2,3/unc44, putative	5.23214	5.94363	5.1739	4.4895	4.4895	4.4895	4.4895	4.4895	4.4895
ACA1_206040	MORN repeat-containing protein	5.16615	4.4895	4.4895	4.4895	4.4895	4.4895	4.4895	4.4895	4.4895
ACA1_206060	Ras subfamily protein	6.45937	5.69423	5.6362	4.4895	4.4895	4.4895	4.4895	4.4895	4.4895
ACA1_206070	Ras subfamily protein	4.86714	5.39251	4.4895	4.4895	4.4895	4.4895	4.4895	4.4895	4.4895
ACA1_206310	0	5.09701	4.4895	4.4895	4.4895	4.4895	4.4895	4.4895	4.4895	4.4895
ACA1_206740	hypothetical protein	4.59358	4.4895	4.4895	4.4895	4.4895	4.4895	4.4895	4.4895	4.4895
ACA1_206980	hypothetical protein	4.59358	4.4895	5.1739	4.4895	4.4895	4.4895	4.4895	4.4895	4.4895
ACA1_207090	hypothetical protein	5.23214	4.4895	5.1739	4.4895	4.4895	4.4895	4.4895	4.4895	4.4895
ACA1_207320	diacylglycerol oacyltransferase	5.23214	4.4895	4.4895	4.4895	4.4895	4.4895	4.4895	4.4895	4.4895
ACA1_207500	hypothetical protein	4.78159	5.01053	4.4895	4.4895	4.4895	4.4895	4.4895	4.4895	4.4895
ACA1_207940	TBC domain containing protein	7.2142	7.31523	7.31128	4.4895	4.4895	4.4895	4.4895	6.26343	4.4895
ACA1_208080	hypothetical protein	4.59358	4.4895	4.4895	4.4895	4.4895	4.4895	4.4895	4.4895	4.4895
ACA1_208130	calponin domain containing protein	5.23214	5.39251	5.6362	4.4895	4.4895	4.4895	4.4895	4.4895	4.4895
ACA1_208180	villin headpiece domain containing protein	6.90596	6.90898	6.26693	4.4895	4.4895	4.4895	4.4895	4.4895	4.4895
ACA1_208200	hypothetical protein	5.16615	5.01053	5.6362	4.4895	4.4895	4.4895	4.4895	4.4895	4.4895
ACA1_208280	hypothetical protein	5.16615	5.01053	5.1739	4.4895	4.4895	4.4895	4.4895	4.4895	4.4895
ACA1_208320	ADPribosylglycohydrolase superfamily protein	5.29523	4.4895	4.4895	4.4895	4.4895	4.4895	4.4895	4.4895	4.4895
ACA1_208410	hypothetical protein	6.3146	7.31523	6.26693	4.4895	4.4895	4.4895	4.4895	4.4895	4.4895
ACA1_208420	Fbox domain containing protein	6.48666	6.50559	5.6362	4.4895	4.4895	4.4895	4.4895	4.4895	4.4895
ACA1_208430	hypothetical protein	5.93336	5.69423	5.1739	4.4895	4.4895	4.4895	4.4895	4.4895	4.4895
ACA1_208450	hypothetical protein	12.4524	12.4914	11.3289	9.27968	10.9529	10.2814	9.79076	9.27705	9.97163
ACA1_208460	abhydrolase associated lipase	6.01059	5.39251	5.6362	4.4895	4.4895	4.4895	4.4895	4.4895	4.4895
ACA1_208480	hypothetical protein	6.1192	5.39251	4.4895	4.4895	4.4895	4.4895	4.4895	4.4895	4.4895
ACA1_208490	Hypothetical protein	5.16615	5.01053	5.1739	4.4895	4.4895	4.4895	4.4895	4.4895	4.4895
ACA1_209100	RasGEF domain containing protein	6.04771	6.15621	5.98576	4.4895	4.4895	4.4895	4.4895	6.26343	7.53965
ACA1_209250	Hsp20/alpha crystallin superfamily protein	4.78159	4.4895	5.6362	4.4895	4.4895	4.4895	4.4895	4.4895	4.4895
ACA1_209660	hypothetical protein	4.86714	4.4895	5.1739	4.4895	4.4895	4.4895	4.4895	4.4895	4.4895
ACA1_209780	glycogen debranching enzyme	5.16615	5.39251	4.4895	4.4895	4.4895	4.4895	4.4895	4.4895	4.4895
ACA1_209870	hypothetical protein	4.78159	4.4895	4.4895	4.4895	4.4895	4.4895	4.4895	4.4895	4.4895
ACA1_210400	pr	5.67324	6.15621	5.6362	4.4895	4.4895	4.4895	4.4895	4.4895	4.4895
ACA1_210530	pyruvate:ferredoxin (flavodoxin) oxidoreductase	5.89313	5.39251	6.50213	4.4895	4.4895	4.4895	4.4895	6.26343	7.53965
ACA1_210560	hypothetical protein	4.9479	4.4895	5.1739	4.4895	4.4895	4.4895	4.4895	4.4895	4.4895
ACA1_210670	universal stress domain containing protein	4.59358	4.4895	4.4895	4.4895	4.4895	4.4895	4.4895	4.4895	4.4895
ACA1_211130	kinase, pfkB superfamily protein	4.59358	4.4895	4.4895	4.4895	4.4895	4.4895	4.4895	4.4895	4.4895
ACA1_211510	DEAD/DEAH box helicase domain containing protein	4.59358	4.4895	4.4895	4.4895	4.4895	4.4895	4.4895	4.4895	4.4895
ACA1_211770	tetratricopeptide repeat domain containing protein	6.64037	6.34145	5.98576	4.4895	4.4895	4.4895	4.4895	4.4895	4.4895
ACA1_212220	hypothetical protein	4.86714	4.4895	4.4895	4.4895	4.4895	4.4895	4.4895	4.4895	4.4895
ACA1_212230	hypothetical protein	4.59358	4.4895	4.4895	4.4895	4.4895	4.4895	4.4895	4.4895	4.4895
ACA1_212350	diacylglycerol kinase catalytic domain containing protein	4.9479	5.01053	5.6362	4.4895	4.4895	4.4895	4.4895	4.4895	4.4895
ACA1_212360	hypothetical protein	4.69064	4.4895	4.4895	4.4895	4.4895	4.4895	4.4895	4.4895	4.4895
ACA1_212830	Protein-tyrosine-phosphatase	5.67324	5.01053	5.1739	4.4895	4.4895	4.4895	4.4895	4.4895	4.4895
ACA1_213080	hypothetical protein	4.9479	5.01053	4.4895	4.4895	4.4895	4.4895	4.4895	4.4895	4.4895
ACA1_213320	hypothetical protein	6.43155	5.94363	5.1739	4.4895	4.4895	4.4895	4.4895	4.4895	4.4895
ACA1_214220	hypothetical protein	5.29523	5.01053	4.4895	4.4895	4.4895	4.4895	4.4895	4.4895	4.4895
ACA1_214350	hypothetical protein	5.29523	5.01053	5.6362	4.4895	4.4895	4.4895	4.4895	4.4895	4.4895
ACA1_214600	hypothetical protein	4.69064	4.4895	4.4895	4.4895	4.4895	4.4895	4.4895	4.4895	4.4895
ACA1_214630	hypothetical protein	5.76526	5.01053	4.4895	4.4895	4.4895	4.4895	4.4895	4.4895	4.4895
ACA1_214900	hypothetical protein	4.69064	5.01053	4.4895	4.4895	4.4895	4.4895	4.4895	4.4895	4.4895
ACA1_214930	hypothetical protein	5.46948	5.01053	5.1739	4.4895	4.4895	4.4895	4.4895	4.4895	4.4895
ACA1_214960	hypothetical protein	5.29523	5.01053	5.6362	4.4895	4.4895	4.4895	4.4895	4.4895	4.4895
ACA1_214970	SNF2 family Nterminal doma	5.67324	5.69423	5.98576	4.4895	4.4895	4.4895	4.4895	4.4895	4.4895
ACA1_214990	hypothetical protein	5.23214	4.4895	5.1739	4.4895	4.4895	4.4895	4.4895	4.4895	4.4895
ACA1_215000	GATA zinc finger domain containing protein	6.18732	6.15621	6.50213	4.4895	4.4895	4.4895	4.4895	4.4895	4.4895
ACA1_215070	RasGEF domain containing protein	5.29523	4.4895	4.4895	4.4895	4.4895	4.4895	4.4895	4.4895	4.4895
ACA1_215480	FHA domain containing protein	5.76526	5.39251	5.1739	4.4895	4.4895	4.4895	4.4895	4.4895	4.4895
ACA1_215680	hypothetical protein	4.86714	5.01053	4.4895	4.4895	4.4895	4.4895	4.4895	4.4895	4.4895
ACA1_215690	bromodomain domain containing protein	5.93336	5.39251	5.98576	4.4895	4.4895	4.4895	4.4895	4.4895	4.4895
ACA1_215730	Hypothetical protein	5.97249	5.39251	5.1739	4.4895	4.4895	4.4895	4.4895	4.4895	4.4895
ACA1_216070	selenide, water dikinase	6.48666	5.69423	6.26693	4.4895	4.4895	4.4895	4.4895	4.4895	4.4895
ACA1_216300	Ras family protein	5.02438	5.39251	5.6362	4.4895	4.4895	4.4895	4.4895	4.4895	4.4895
ACA1_216430	ubiquitin specific pept	6.68817	5.69423	6.50213	4.4895	4.4895	4.4895	4.4895	4.4895	4.4895
ACA1_216460	formyl transferase, c-terminal domain containing protein	4.78159	4.4895	5.1739	4.4895	4.4895	4.4895	4.4895	4.4895	4.4895
ACA1_216570	hypothetical protein	4.69064	4.4895	4.4895	4.4895	4.4895	4.4895	4.4895	4.4895	4.4895
ACA1_217170	Microfibrillar associated protein	5.89313	5.69423	5.6362	4.4895	4.4895	4.4895	4.4895	4.4895	4.4895
ACA1_217200	glutathione transferase subfamily protein	4.78159	4.4895	4.4895	4.4895	4.4895	4.4895	4.4895	4.4895	4.4895
ACA1_217230	RasGEF domain containing protein	5.57496	5.01053	5.1739	4.4895	4.4895	4.4895	4.4895	4.4895	4.4895
ACA1_217280	protein kinase domain containing protein	10.8525	10.1626	9.69173	10.8295	10.376	11.5876	9.79076	10.1159	9.97163
ACA1_217710	Fbox domain containing protein	5.09701	4.4895	5.1739	4.4895	4.4895	4.4895	4.4895	4.4895	4.4895
ACA1_218580	leucine rich repeat domain containing protein	5.76526	5.94363	6.70431	4.4895	4.4895	4.4895	4.4895	4.4895	4.4895
ACA1_218670	urease accessory protein UreD, putative	5.85176	5.01053	5.1739	4.4895	4.4895	4.4895	4.4895	4.4895	4.4895
ACA1_218680	PH domain containing protein	5.76526	5.39251	5.98576	4.4895	4.4895	4.4895	4.4895	4.4895	4.4895
ACA1_219020	hypothetical protein	4.9479	4.4895	5.6362	4.4895	4.4895	4.4895	4.4895	4.4895	4.4895
ACA1_219030	hypothetical protein	4.9479	4.4895	4.4895	4.4895	4.4895	4.4895	4.4895	4.4895	4.4895
ACA1_219040	Ubox domain containing protein	4.78159	4.4895	5.1739	4.4895	4.4895	4.4895	4.4895	4.4895	4.4895
ACA1_219690	hypothetical protein	4.78159	4.4895	4.4895	4.4895	4.4895	4.4895	4.4895	4.4895	4.4895
ACA1_219750	geranylgeranyl reductase subfamily protein	5.23214	5.39251	4.4895	4.4895	4.4895	4.4895	4.4895	4.4895	4.4895
ACA1_219800	hypothetical protein	6.844	6.90898	5.98576	4.4895	4.4895	4.4895	4.4895	4.4895	4.4895
ACA1_219810	hypothetical protein	5.35569	5.01053	5.1739	4.4895	4.4895	4.4895	4.4895	4.4895	4.4895
ACA1_219850	radical SAM domain containing protein	6.59093	6.65295	6.26693	4.4895	4.4895	4.4895	4.4895	4.4895	4.4895
ACA1_220110	hypothetical protein	5.02438	5.01053	4.4895	4.4895	4.4895	4.4895	4.4895	4.4895	4.4895
ACA1_220490	hypothetical protein	5.09701	4.4895	4.4895	4.4895	4.4895	4.4895	4.4895	4.4895	4.4895
ACA1_220600	leucine rich repeat domain containing protein	4.59358	4.4895	4.4895	4.4895	4.4895	4.4895	4.4895	4.4895	4.4895
ACA1_220620	hypothetical protein	4.69064	4.4895	5.1739	4.4895	4.4895	4.4895	4.4895	4.4895	4.4895
ACA1_220670	tetratricopeptide repeat-containing protein	5.62494	4.4895	4.4895	4.4895	4.4895	4.4895	4.4895	4.4895	4.4895
ACA1_220680	hypothetical protein	5.52318	5.01053	4.4895	4.4895	4.4895	4.4895	4.4895	4.4895	4.4895
ACA1_220730	DEAD/DEAH box helicase domain conta	5.02438	4.4895	5.1739	4.4895	4.4895	4.4895	4.4895	4.4895	4.4895
ACA1_220780	urease, gamma subunit	6.56556	6.50559	5.6362	4.4895	4.4895	4.4895	4.4895	4.4895	4.4895
ACA1_221010	Fbox domain containing protein	5.57496	5.94363	5.6362	4.4895	4.4895	4.4895	4.4895	4.4895	4.4895
ACA1_221020	MYND finger domain containing protein	4.86714	4.4895	4.4895	4.4895	4.4895	4.4895	4.4895	4.4895	4.4895
ACA1_221080	LIM domain containing protein	4.9479	5.01053	4.4895	4.4895	4.4895	4.4895	4.4895	4.4895	4.4895
ACA1_221320	hypothetical protein	4.69064	4.4895	4.4895	4.4895	4.4895	4.4895	4.4895	4.4895	4.4895
ACA1_222770	YDG/SRA domain containing protein	7.16437	6.34145	6.50213	4.4895	4.4895	4.4895	4.4895	4.4895	4.4895
ACA1_223220	0	6.37426	6.50559	5.6362	4.4895	4.4895	4.4895	4.4895	4.4895	4.4895
ACA1_223290	K+ channel tetramerisation subfamily protein	4.86714	4.4895	4.4895	4.4895	4.4895	4.4895	4.4895	4.4895	4.4895
ACA1_223330	peptidase S8 and S53 subtilisin kexin sedolisin, putative	10.7675	10.8144	9.73853	10.2534	10.9529	9.30718	10.7724	8.65452	8.44982
ACA1_223340	hypothetical protein	5.80916	5.39251	4.4895	4.4895	4.4895	4.4895	4.4895	4.4895	4.4895
ACA1_223570	protein kinase domain containing protein	5.89313	5.94363	5.6362	4.4895	4.4895	4.4895	4.4895	4.4895	4.4895
ACA1_224160	hypothetical protein	5.29523	5.39251	5.1739	4.4895	4.4895	4.4895	4.4895	4.4895	4.4895
ACA1_224170	RapGAP/RanGAP domain containing protein	4.86714	4.4895	4.4895	4.4895	4.4895	4.4895	4.4895	4.4895	4.4895
ACA1_224370	Exportin 1like protein	8.00016	8.30193	9.403	9.27968	9.40022	9.30718	9.79076	7.90626	7.53965
ACA1_224410	hypothetical protein	5.41371	4.4895	5.1739	4.4895	4.4895	4.4895	4.4895	4.4895	4.4895
ACA1_224430	hypothetical protein	5.09701	5.01053	5.1739	4.4895	4.4895	4.4895	4.4895	4.4895	4.4895
ACA1_224480	hypothetical protein	4.78159	4.4895	4.4895	4.4895	4.4895	4.4895	4.4895	4.4895	4.4895
ACA1_224530	hypothetical protein	4.9479	5.39251	5.1739	4.4895	4.4895	4.4895	4.4895	4.4895	4.4895
ACA1_224560	phosphate ABC transporter, phosphatebinding protein PstS, putative	5.29523	5.94363	5.6362	4.4895	4.4895	4.4895	4.4895	4.4895	4.4895
ACA1_224860	myosin head (motor domain) domain containing protein	5.23214	5.01053	5.6362	4.4895	4.4895	4.4895	4.4895	6.26343	4.4895
ACA1_224910	NAD dependent epimerase/dehydratase superfamily protein	4.69064	4.4895	5.1739	4.4895	4.4895	4.4895	4.4895	4.4895	4.4895
ACA1_224920	hypothetical protein	4.9479	4.4895	5.1739	4.4895	4.4895	4.4895	4.4895	4.4895	4.4895
ACA1_224950	Fbox domain containing protein	5.16615	5.94363	5.1739	4.4895	4.4895	4.4895	4.4895	4.4895	4.4895
ACA1_225950	thiamine pyrophosphokinase	4.78159	5.01053	5.6362	4.4895	4.4895	4.4895	4.4895	4.4895	4.4895
ACA1_226210	Fbox domain containing protein	6.45937	5.39251	5.1739	4.4895	4.4895	4.4895	4.4895	4.4895	4.4895
ACA1_226700	selenocysteinespecific elongation factor	6.22021	5.39251	5.1739	4.4895	4.4895	4.4895	4.4895	4.4895	4.4895
ACA1_226710	hypothetical protein	5.46948	4.4895	4.4895	4.4895	4.4895	4.4895	4.4895	4.4895	4.4895
ACA1_226730	PH domain containing protein	5.52318	5.01053	5.98576	4.4895	4.4895	4.4895	4.4895	4.4895	4.4895
ACA1_227050	hypothetical protein	5.02438	5.01053	5.6362	4.4895	4.4895	4.4895	4.4895	4.4895	4.4895
ACA1_227740	hypothetical protein	4.9479	4.4895	4.4895	4.4895	4.4895	4.4895	4.4895	4.4895	4.4895
ACA1_228050	hypothetical protein	5.09701	4.4895	4.4895	4.4895	4.4895	4.4895	4.4895	4.4895	4.4895
ACA1_228400	hypothetical protein	4.59358	4.4895	4.4895	4.4895	4.4895	4.4895	4.4895	4.4895	4.4895
ACA1_228630	hypothetical protein	6.64037	5.69423	5.6362	4.4895	4.4895	4.4895	4.4895	4.4895	4.4895
ACA1_228690	MORN repeatcontaining protein	5.52318	5.39251	5.6362	4.4895	4.4895	4.4895	4.4895	4.4895	4.4895
ACA1_228760	Mitochondrial carrier protein	5.67324	5.01053	5.6362	4.4895	4.4895	4.4895	4.4895	4.4895	4.4895
ACA1_228770	PH domain containing protein	5.97249	5.39251	5.98576	4.4895	4.4895	4.4895	4.4895	4.4895	4.4895
ACA1_228790	IgA-specific serine endopeptidase	6.82274	6.50559	5.98576	4.4895	4.4895	4.4895	4.4895	4.4895	4.4895
ACA1_229040	Omethyltransferase family protein	4.59358	4.4895	4.4895	4.4895	4.4895	4.4895	4.4895	4.4895	4.4895
ACA1_229170	hypothetical protein	6.01059	6.34145	5.98576	4.4895	4.4895	4.4895	4.4895	4.4895	4.4895
ACA1_229250	hypothetical protein	4.78159	4.4895	4.4895	4.4895	4.4895	4.4895	4.4895	4.4895	4.4895
ACA1_229550	RUN domain containing protein	4.86714	5.01053	4.4895	4.4895	4.4895	4.4895	4.4895	4.4895	4.4895
ACA1_230210	phosphatidylinositol transfer protein	4.78159	5.01053	4.4895	4.4895	4.4895	4.4895	4.4895	4.4895	4.4895
ACA1_230250	hypothetical protein	4.69064	4.4895	4.4895	4.4895	4.4895	4.4895	4.4895	4.4895	4.4895
ACA1_230290	hypothetical protein	4.78159	5.01053	4.4895	4.4895	4.4895	4.4895	4.4895	4.4895	4.4895
ACA1_230320	CUGbinding protein LYLQ isoform, putative	4.59358	4.4895	4.4895	4.4895	4.4895	4.4895	4.4895	4.4895	4.4895
ACA1_231120	hypothetical protein	4.59358	4.4895	4.4895	4.4895	4.4895	4.4895	4.4895	4.4895	4.4895
ACA1_231580	hypothetical protein	4.59358	4.4895	4.4895	4.4895	4.4895	4.4895	4.4895	4.4895	4.4895
ACA1_231800	hypothetical protein	4.59358	4.4895	4.4895	4.4895	4.4895	4.4895	4.4895	4.4895	4.4895
ACA1_231810	hypothetical protein	5.16615	5.94363	5.1739	4.4895	4.4895	4.4895	4.4895	4.4895	4.4895
ACA1_231930	TPR repeat-containing protein	4.69064	4.4895	5.6362	4.4895	4.4895	4.4895	4.4895	4.4895	4.4895
ACA1_232140	hypothetical protein	4.86714	4.4895	4.4895	4.4895	4.4895	4.4895	4.4895	4.4895	4.4895
ACA1_232270	elongation factor Tu GTP binding domain containing prote	4.78159	5.01053	4.4895	4.4895	4.4895	4.4895	4.4895	4.4895	4.4895
ACA1_232420	tetratricopeptide repeat domain containing protein	6.51344	5.69423	5.1739	4.4895	4.4895	4.4895	4.4895	4.4895	4.4895
ACA1_232440	transporter, major facilitator subfamily protein	4.86714	4.4895	4.4895	4.4895	4.4895	4.4895	4.4895	4.4895	4.4895
ACA1_232520	SIT4 phosphataseassoci	12.4279	12.0242	10.9948	9.27968	10.376	10.2814	10.7724	8.65452	9.00355
ACA1_232810	CHY zinc finger protein	6.1192	6.15621	5.98576	4.4895	4.4895	4.4895	4.4895	4.4895	4.4895
ACA1_232850	hypothetical protein	4.59358	4.4895	4.4895	4.4895	4.4895	4.4895	4.4895	4.4895	4.4895
ACA1_232880	Fucokinase	5.93336	6.15621	5.98576	4.4895	4.4895	4.4895	4.4895	4.4895	4.4895
ACA1_233090	eukaryotic translation initiation factor	12.3696	12.2053	12.2477	11.5593	11.3638	11.2683	9.79076	11.0279	10.9554
ACA1_233410	NFX1type zinc finger-containing protein 1, putative	4.86714	4.4895	5.1739	4.4895	4.4895	4.4895	4.4895	4.4895	4.4895
ACA1_233590	hypothetical protein	5.29523	5.69423	4.4895	4.4895	4.4895	4.4895	4.4895	6.26343	4.4895
ACA1_233850	pxPhosphoserine phosphatase	4.59358	4.4895	4.4895	4.4895	4.4895	4.4895	4.4895	4.4895	4.4895
ACA1_233860	von Willebrand factor type A domain containing protein, putative	5.23214	4.4895	4.4895	4.4895	4.4895	4.4895	4.4895	4.4895	4.4895
ACA1_234010	hypothetical protein	4.59358	4.4895	4.4895	4.4895	4.4895	4.4895	4.4895	4.4895	4.4895
ACA1_234080	LBP / BPI / CETP family, Nterminal domain containing protein	5.02438	4.4895	4.4895	4.4895	4.4895	4.4895	4.4895	4.4895	4.4895
ACA1_234200	hypothetical protein	5.29523	5.01053	5.6362	4.4895	4.4895	4.4895	4.4895	4.4895	4.4895
ACA1_234230	peptidase, S8/S53 subfamily protein	5.16615	5.69423	5.98576	4.4895	4.4895	4.4895	4.4895	4.4895	4.4895
ACA1_234300	hypothetical protein	6.51344	6.15621	5.98576	4.4895	4.4895	4.4895	4.4895	4.4895	4.4895
ACA1_234310	RNA recognition motif domain containing protein	5.41371	5.01053	4.4895	4.4895	4.4895	4.4895	4.4895	4.4895	4.4895
ACA1_234470	pentatricopeptide repeat domain/PPR repeatcontaining protein	6.1192	5.94363	5.98576	4.4895	4.4895	4.4895	4.4895	4.4895	4.4895
ACA1_234580	RWPRK domain containing protein	5.41371	4.4895	4.4895	4.4895	4.4895	4.4895	4.4895	4.4895	4.4895
ACA1_234590	PH domain containing protein	6.80117	5.94363	5.1739	4.4895	4.4895	4.4895	4.4895	4.4895	4.4895
ACA1_234620	polyadenylate-binding protein family protein	12.0128	11.6949	11.9574	10.8295	10.376	10.2814	9.79076	8.83708	9.97163
ACA1_234800	hypothetical protein	4.9479	4.4895	5.1739	4.4895	4.4895	4.4895	4.4895	4.4895	4.4895
ACA1_235410	hypothetical protein	5.23214	5.69423	4.4895	4.4895	4.4895	4.4895	4.4895	4.4895	4.4895
ACA1_235540	thioredoxin domain containing protein	4.59358	4.4895	4.4895	4.4895	4.4895	4.4895	4.4895	4.4895	4.4895
ACA1_235700	TLD protein	5.41371	5.01053	4.4895	4.4895	4.4895	4.4895	4.4895	4.4895	4.4895
ACA1_235750	rufy2 protein	4.69064	5.01053	4.4895	4.4895	4.4895	4.4895	4.4895	4.4895	4.4895
ACA1_235760	Viral Atype inclusion protein repeat-containing protein	5.16615	4.4895	5.98576	4.4895	4.4895	4.4895	4.4895	4.4895	4.4895
ACA1_235780	hypothetical protein	4.78159	4.4895	4.4895	4.4895	4.4895	4.4895	4.4895	4.4895	4.4895
ACA1_236060	hypothetical protein	5.16615	4.4895	4.4895	4.4895	4.4895	4.4895	4.4895	4.4895	4.4895
ACA1_236110	protein phosphatase 2C domain containing protein	7.2142	5.94363	5.98576	4.4895	4.4895	4.4895	4.4895	4.4895	4.4895
ACA1_236160	type II CPD DNA photolyase	6.34474	5.94363	5.98576	4.4895	4.4895	4.4895	4.4895	4.4895	4.4895
ACA1_236170	GTPase activating Rap/RanGAP domainlike 3, putative	5.52318	5.39251	5.1739	4.4895	4.4895	4.4895	4.4895	4.4895	4.4895
ACA1_236300	hypothetical protein	4.69064	4.4895	4.4895	4.4895	4.4895	4.4895	4.4895	4.4895	4.4895
ACA1_236500	UBA/TSN domain containing protein	5.93336	5.94363	5.1739	4.4895	4.4895	4.4895	4.4895	4.4895	4.4895
ACA1_236930	hypothetical protein	4.59358	4.4895	4.4895	4.4895	4.4895	4.4895	4.4895	4.4895	4.4895
ACA1_237550	hypothetical protein	4.59358	4.4895	4.4895	4.4895	4.4895	4.4895	4.4895	4.4895	4.4895
ACA1_237820	hypothetical protein	5.23214	5.01053	4.4895	4.4895	4.4895	4.4895	4.4895	4.4895	4.4895
ACA1_237830	F-box domain containing protein	5.02438	4.4895	4.4895	4.4895	4.4895	4.4895	4.4895	4.4895	4.4895
ACA1_238110	hypothetical protein	5.09701	4.4895	5.1739	4.4895	4.4895	4.4895	4.4895	4.4895	4.4895
ACA1_238120	RFX DNAbinding domain containing protein	4.69064	4.4895	4.4895	4.4895	4.4895	4.4895	4.4895	4.4895	4.4895
ACA1_238130	RapGAP/RanGAP domain containing protein	5.09701	4.4895	4.4895	4.4895	4.4895	4.4895	4.4895	4.4895	4.4895
ACA1_238140	hypothetical protein	5.16615	4.4895	5.1739	4.4895	4.4895	4.4895	4.4895	4.4895	4.4895
ACA1_238420	PH domain containing protein	6.43155	6.34145	6.88161	4.4895	4.4895	4.4895	4.4895	4.4895	4.4895
ACA1_238590	CBS domain containing protein	5.41371	5.01053	5.1739	4.4895	4.4895	4.4895	4.4895	4.4895	4.4895
ACA1_238880	RhoGEF domain containing protein	5.02438	4.4895	5.98576	4.4895	4.4895	4.4895	4.4895	4.4895	4.4895
ACA1_239090	hemerythrin hhe cation binding subfamily protein	4.9479	5.01053	4.4895	4.4895	4.4895	4.4895	4.4895	4.4895	4.4895
ACA1_239200	MYND finger domain containing protein	5.29523	5.39251	5.1739	4.4895	4.4895	4.4895	4.4895	4.4895	4.4895
ACA1_239240	RhoGEF domain containing protein	6.53974	5.94363	6.70431	4.4895	4.4895	4.4895	4.4895	4.4895	4.4895
ACA1_239390	hypothetical protein	4.9479	5.01053	5.1739	4.4895	4.4895	4.4895	4.4895	4.4895	4.4895
ACA1_239540	hypothetical protein	4.69064	4.4895	4.4895	4.4895	4.4895	4.4895	4.4895	4.4895	4.4895
ACA1_239680	tetrahydrofolate dehydrogenase/cyclohydrolase, NAD(P)binding domain contai	5.46948	5.39251	5.1739	4.4895	4.4895	4.4895	4.4895	4.4895	4.4895
ACA1_240290	NOL1/NOP2/sun family domain containing protei	5.97249	6.34145	5.6362	4.4895	4.4895	4.4895	4.4895	4.4895	4.4895
ACA1_240370	hypothetical protein	4.69064	4.4895	4.4895	4.4895	4.4895	4.4895	4.4895	4.4895	4.4895
ACA1_240380	hypothetical protein	4.59358	4.4895	4.4895	4.4895	4.4895	4.4895	4.4895	4.4895	4.4895
ACA1_240390	acylCoA dehydrogenase domain containing protein	6.59093	6.90898	5.98576	4.4895	4.4895	4.4895	4.4895	4.4895	4.4895
ACA1_240820	hypothetical protein	4.59358	4.4895	4.4895	4.4895	4.4895	4.4895	4.4895	4.4895	4.4895
ACA1_241370	hypothetical protein	4.78159	4.4895	4.4895	4.4895	4.4895	4.4895	4.4895	4.4895	4.4895
ACA1_242060	methyltransferase, YaeB/AF_0241	4.86714	5.01053	5.1739	4.4895	4.4895	4.4895	4.4895	4.4895	4.4895
ACA1_242170	hypothetical protein	4.69064	5.01053	4.4895	4.4895	4.4895	4.4895	4.4895	4.4895	4.4895
ACA1_243280	hypothetical protein	4.59358	4.4895	4.4895	4.4895	4.4895	4.4895	4.4895	4.4895	4.4895
ACA1_243390	hypothetical protein	4.9479	4.4895	4.4895	4.4895	4.4895	4.4895	4.4895	4.4895	4.4895
ACA1_243430	Fbox domain containing protein	4.69064	4.4895	4.4895	4.4895	4.4895	4.4895	4.4895	4.4895	4.4895
ACA1_243450	hypothetical protein	4.78159	4.4895	4.4895	4.4895	4.4895	4.4895	4.4895	4.4895	4.4895
ACA1_243610	hypothetical protein	4.59358	4.4895	5.1739	4.4895	4.4895	4.4895	4.4895	4.4895	4.4895
ACA1_243830	hypothetical protein	4.69064	4.4895	4.4895	4.4895	4.4895	4.4895	4.4895	4.4895	4.4895
ACA1_244350	hypothetical protein	5.16615	5.01053	4.4895	4.4895	4.4895	4.4895	4.4895	4.4895	4.4895
ACA1_244370	mitogen-activated protein kinase kinase kinase	6.0839	6.34145	5.6362	4.4895	4.4895	4.4895	4.4895	4.4895	4.4895
ACA1_244780	hypothetical protein	4.9479	5.01053	4.4895	4.4895	4.4895	4.4895	4.4895	4.4895	4.4895
ACA1_244810	tRNA pseudouridine synthase	5.16615	5.94363	5.1739	4.4895	4.4895	4.4895	4.4895	4.4895	4.4895
ACA1_245070	aminotransferase class IV, putative	6.04771	5.69423	5.1739	4.4895	4.4895	4.4895	4.4895	4.4895	4.4895
ACA1_245440	zinc finger in N-recognin protein	4.69064	4.4895	5.1739	4.4895	4.4895	4.4895	4.4895	4.4895	4.4895
ACA1_245830	alpha/beta hydrolase domain containing protein	5.09701	5.01053	4.4895	4.4895	4.4895	4.4895	4.4895	4.4895	4.4895
ACA1_245950	CBS domain containing protein	4.69064	4.4895	4.4895	4.4895	4.4895	4.4895	4.4895	4.4895	4.4895
ACA1_246080	ATPase, AAA domain containing protein	4.59358	4.4895	4.4895	4.4895	4.4895	4.4895	4.4895	4.4895	4.4895
ACA1_246140	GATA zinc finger domain containing protein	4.78159	4.4895	4.4895	4.4895	4.4895	4.4895	4.4895	4.4895	4.4895
ACA1_246260	hypothetical protein	4.78159	4.4895	4.4895	4.4895	4.4895	4.4895	4.4895	4.4895	4.4895
ACA1_246370	hypothetical protein	4.69064	5.01053	4.4895	4.4895	4.4895	4.4895	4.4895	4.4895	4.4895
ACA1_246380	hypothetical protein	4.59358	4.4895	4.4895	4.4895	4.4895	4.4895	4.4895	4.4895	4.4895
ACA1_246820	SNF2 family Nterminal domain containing protein	5.71999	5.39251	4.4895	4.4895	4.4895	4.4895	4.4895	6.26343	7.53965
ACA1_246830	ERCC4 domain containing protei	5.97249	5.69423	5.98576	4.4895	4.4895	4.4895	4.4895	4.4895	4.4895
ACA1_246840	hypothetical protein	5.29523	5.69423	5.6362	4.4895	4.4895	4.4895	4.4895	4.4895	4.4895
ACA1_247140	hypothetical protein	5.09701	4.4895	4.4895	4.4895	4.4895	4.4895	4.4895	4.4895	4.4895
ACA1_247160	HEAT repeat domain containing protein	6.45937	5.39251	5.98576	4.4895	4.4895	4.4895	4.4895	4.4895	4.4895
ACA1_247240	ATPase/histidine kinase/DNA gyrase B/HSP90 domain containing protein	5.46948	5.39251	4.4895	4.4895	4.4895	4.4895	4.4895	4.4895	4.4895
ACA1_247250	hypothetical protein	5.76526	5.39251	6.50213	4.4895	4.4895	4.4895	4.4895	4.4895	4.4895
ACA1_247490	hypothetical protein	5.52318	5.01053	5.1739	4.4895	4.4895	4.4895	4.4895	4.4895	4.4895
ACA1_247610	FYVEtype Zn finger-containing protein	5.29523	5.39251	5.1739	4.4895	4.4895	4.4895	4.4895	4.4895	4.4895
ACA1_248060	hypothetical protein	5.76526	4.4895	5.1739	4.4895	4.4895	4.4895	4.4895	4.4895	4.4895
ACA1_248530	AMPdependent synthetase and ligase	4.69064	4.4895	4.4895	4.4895	4.4895	4.4895	4.4895	4.4895	4.4895
ACA1_248560	ATPase/histidine kinase/DNA gyrase B/HSP90 domain containing protein	4.69064	5.01053	5.1739	4.4895	4.4895	4.4895	4.4895	4.4895	4.4895
ACA1_248590	hypothetical protein	6.01059	5.69423	5.6362	4.4895	4.4895	4.4895	4.4895	4.4895	4.4895
ACA1_248600	mannosebinding protein	6.15366	5.94363	5.6362	4.4895	4.4895	4.4895	4.4895	4.4895	4.4895
ACA1_248610	hypothetical protein	4.78159	4.4895	5.1739	4.4895	4.4895	4.4895	4.4895	4.4895	4.4895
ACA1_248680	SAC3/GANP family protein	7.00365	6.90898	7.43012	4.4895	4.4895	4.4895	4.4895	7.03539	4.4895
ACA1_248690	Fbox domain containing protein	4.69064	5.01053	5.1739	4.4895	4.4895	4.4895	4.4895	4.4895	4.4895
ACA1_248800	hypothetical protein	5.62494	5.94363	5.1739	4.4895	4.4895	4.4895	4.4895	4.4895	4.4895
ACA1_248820	serine/threonine protein kinase, putative	5.46948	5.94363	5.6362	4.4895	4.4895	4.4895	4.4895	6.26343	4.4895
ACA1_249120	hypothetical protein	4.78159	4.4895	4.4895	4.4895	4.4895	4.4895	4.4895	4.4895	4.4895
ACA1_249350	GATSlike protein 1, putative	5.41371	4.4895	4.4895	4.4895	4.4895	4.4895	4.4895	4.4895	4.4895
ACA1_249900	hypothetical protein	5.85176	5.69423	5.6362	4.4895	4.4895	4.4895	4.4895	4.4895	4.4895
ACA1_249910	EGF family domain containing protein	5.09701	4.4895	5.6362	4.4895	4.4895	4.4895	4.4895	4.4895	4.4895
ACA1_250020	hypothetical protein	4.59358	4.4895	4.4895	4.4895	4.4895	4.4895	4.4895	4.4895	4.4895
ACA1_250050	Leucine-rich repeat-containing protein	5.09701	5.39251	5.1739	4.4895	4.4895	4.4895	4.4895	4.4895	4.4895
ACA1_250160	hypothetical protein	4.69064	4.4895	4.4895	4.4895	4.4895	4.4895	4.4895	4.4895	4.4895
ACA1_250310	serine/threonine protein kinase	4.86714	5.39251	4.4895	4.4895	4.4895	4.4895	4.4895	4.4895	4.4895
ACA1_250420	hypothetical protein	4.69064	4.4895	4.4895	4.4895	4.4895	4.4895	4.4895	4.4895	4.4895
ACA1_250430	hypothetical protein	5.02438	4.4895	4.4895	4.4895	4.4895	4.4895	4.4895	4.4895	4.4895
ACA1_250540	tau-protein kinase	6.01059	5.39251	4.4895	4.4895	4.4895	4.4895	4.4895	4.4895	4.4895
ACA1_250780	Fbox domain containing protein	4.69064	4.4895	4.4895	4.4895	4.4895	4.4895	4.4895	4.4895	4.4895
ACA1_250790	hypothetical protein	5.02438	5.39251	4.4895	4.4895	4.4895	4.4895	4.4895	4.4895	4.4895
ACA1_250820	Ankyrin repeatcontaining protein	5.23214	5.39251	5.1739	4.4895	4.4895	4.4895	4.4895	4.4895	4.4895
ACA1_251060	CCAATbox-binding transcription factor, putative	6.66447	5.69423	4.4895	4.4895	4.4895	4.4895	4.4895	4.4895	4.4895
ACA1_251310	LICD family protein	4.69064	4.4895	4.4895	4.4895	4.4895	4.4895	4.4895	4.4895	4.4895
ACA1_251340	hypothetical protein	4.69064	4.4895	4.4895	4.4895	4.4895	4.4895	4.4895	4.4895	4.4895
[truncated: 1,038 more rows]
